# Supplementary material for: Fine-mapping the MHC locus in juvenile idiopathic arthritis (JIA) reveals genetic heterogeneity corresponding to distinct adult inflammatory arthritic diseases
Source: Ann Rheum Dis. 2016 Dec 20;76(4):765–72. doi: 10.1136/annrheumdis-2016-210025 (PMC5530326; doi:10.1136/annrheumdis-2016-210025)
Supplement: Supplementary table 8 [file annrheumdis-2016-210025supp003.xlsx]

## Sheet: Supplementary Table 8
							AllJIA	sJIA	persistent oligoarthritis	extended oligo	RF neg polyarthritis	RF pos polyarthritis	ERA	jPSA
Gene	amino acid	name	model.type	num.residues	degrees of freedom	position	p-value	p-value	p-value	p-value	p-value	p-value	p-value	p-value
A	105	AA_A_105	logistic	1	2	30019066	5.38e-13	0.926492	1.52e-09	3.39e-08	0.0013581	0.488193	0.0187375	0.493838
A	107	AA_A_107	logistic	1	2	30019072	7.75e-54	0.564529	6.52e-41	6.62e-24	3.21e-12	0.000295645	0.000501875	0.0945479
A	109	AA_A_109	logistic	1	2	30019078	0.269479	0.863316	0.106526	0.386752	0.801266	0.556892	0.106847	0.0890159
A	0.11	AA_A_.11	omnibus	2	1	30018350	4.58e-16	0.500039	1.66e-15	0.000195236	4.82e-05	0.288229	0.794246	0.590564
A	114	AA_A_114	omnibus	4	3	30019093	5.09e-58	0.173976	5.95e-44	4.59e-24	3.76e-16	0.00965398	6.03e-05	0.752713
A	116	AA_A_116	omnibus	3	2	30019099	5.89e-59	0.0864223	7.43e-45	1.1e-24	8.87e-17	0.00348681	0.000111953	0.60517
A	127	AA_A_127	logistic	1	2	30019132	1.88e-59	0.688788	8.87e-47	1.54e-22	6.42e-17	0.0797149	2.33e-05	0.813245
A	142	AA_A_142	logistic	1	2	30019177	1.62e-52	0.729266	1.9e-42	3.99e-20	4.75e-12	0.000553067	0.00027922	0.247346
A	144	AA_A_144	omnibus	2	1	30019183	7.38e-21	0.930119	1.27e-17	2.79e-06	3.6e-08	0.355098	0.473826	0.31266
A	145	AA_A_145	logistic	1	2	30019186	1.65e-52	0.729264	1.92e-42	4.04e-20	4.77e-12	0.000553985	0.000278748	0.247432
A	149	AA_A_149	logistic	1	2	30019198	0.024883	0.668776	0.0137376	0.712245	0.534278	0.234086	0.379519	0.237562
A	0.15	AA_A_.15	omnibus	2	1	30018338	8.7e-53	0.843343	4.02e-41	1.07e-21	1.24e-15	0.243497	0.000105942	0.443148
A	150	AA_A_150	logistic	1	2	30019201	3.04e-05	0.120718	0.00224566	6.2e-06	0.0169146	0.689991	0.00277614	0.219663
A	151	AA_A_151	logistic	1	2	30019204	3.67e-18	0.861587	4.05e-14	4.14e-06	8.55e-08	0.841703	0.533159	0.761201
A	152	AA_A_152	omnibus	4	3	30019207	5.55e-27	0.373147	3.14e-19	2.51e-11	3.78e-07	0.0365379	1.78e-05	0.830377
A	156	AA_A_156	omnibus	4	3	30019219	1.43e-06	0.491428	0.000114901	1.42e-06	0.0249356	0.0492887	0.0112561	0.00708092
A	158	AA_A_158	logistic	1	2	30019225	3.16e-05	0.120102	0.00231476	6.38e-06	0.0174749	0.690527	0.00254518	0.219077
A	161	AA_A_161	logistic	1	2	30019234	1.72e-09	0.244861	4.87e-07	0.00527667	0.00517411	0.0915084	0.0211939	0.867455
A	163	AA_A_163	omnibus	2	1	30019240	2e-13	0.899383	9.11e-10	3.51e-08	0.000913563	0.496687	0.00147004	0.949069
A	166	AA_A_166	logistic	1	2	30019249	0.10017	0.0385561	0.279489	0.00625041	0.970669	0.177689	0.0831755	0.581448
A	167	AA_A_167	logistic	1	2	30019252	0.100071	0.038569	0.279069	0.00625477	0.970886	0.17769	0.0831664	0.581102
A	17	AA_A_17	logistic	1	2	30018561	0.0181262	0.0247326	0.00385292	0.0437997	0.00415387	0.0113958	0.341734	0.312131
A	184	AA_A_184	omnibus	2	1	30019881	4.62e-24	0.2497	2.25e-19	6.81e-13	1.89e-05	0.0783091	0.00370244	0.480226
A	193	AA_A_193	omnibus	2	1	30019908	3.06e-18	0.331156	2.7e-13	3.06e-10	0.000216704	0.041932	0.00332381	0.756389
A	194	AA_A_194	omnibus	2	1	30019911	3.06e-18	0.331288	2.7e-13	3.06e-10	0.000216649	0.0419251	0.00332335	0.756473
A	207	AA_A_207	omnibus	2	1	30019950	2.75e-18	0.367891	2.99e-13	3.18e-10	0.000207853	0.0414833	0.00336731	0.7547
A	245	AA_A_245	omnibus	2	1	30020064	0.485508	0.625977	0.0982026	0.122127	0.654877	0.907079	0.520081	0.204276
A	246	AA_A_246	omnibus	2	1	30020067	3.66e-17	0.409554	9.32e-17	0.000269861	7.05e-05	0.0861048	0.471165	0.295866
A	253	AA_A_253	omnibus	2	1	30020088	3.33e-18	0.346713	3.13e-13	3.18e-10	0.000238434	0.04045	0.00340866	0.731735
A	276	AA_A_276	omnibus	2	1	30020259	7.79e-27	0.839742	3.46e-19	3.89e-14	1.35e-08	0.587883	0.000114651	0.265413
A	282	AA_A_282	omnibus	2	1	30020277	0.00568193	0.278587	0.024037	0.0945412	0.00341388	0.00804894	0.211698	0.0088205
A	283	AA_A_283	omnibus	2	1	30020280	0.0393072	0.538178	0.647977	0.126381	0.0344518	0.256924	0.155916	0.35402
A	294	AA_A_294	omnibus	2	1	30020313	4.04e-18	0.348413	3.54e-13	5.14e-10	0.000230547	0.0387677	0.00337062	0.733065
A	297	AA_A_297	omnibus	2	1	30020322	0.294154	0.918033	0.113996	0.347516	0.862887	0.516055	0.135693	0.111153
A	298	AA_A_298	omnibus	2	1	30020325	3.1e-16	0.512873	1.73e-15	0.000120419	4.89e-05	0.255526	0.794611	0.596002
A	299	AA_A_299	omnibus	2	1	30020328	2.64e-17	0.46238	6.85e-17	0.000233837	6e-05	0.0796269	0.463851	0.294661
A	307	AA_A_307	omnibus	2	1	30020352	3.3e-16	0.52895	1.73e-15	0.000120285	4.93e-05	0.255345	0.794715	0.596231
A	311	AA_A_311	omnibus	2	1	30020364	0.00538694	0.272424	0.0239692	0.0810266	0.00360029	0.00783767	0.213721	0.00873675
A	321	AA_A_321	omnibus	2	1	30020836	7.18e-27	0.856683	3.54e-19	3.4e-14	1.35e-08	0.587139	0.000115643	0.264995
A	334	AA_A_334	omnibus	2	1	30021017	2.18e-17	0.400218	7.78e-17	0.000224646	5.85e-05	0.079787	0.46808	0.294335
A	44	AA_A_44	logistic	1	2	30018642	2.48e-05	0.121682	0.00199607	5.79e-06	0.0156816	0.700751	0.00254181	0.221866
A	56	AA_A_56	omnibus	2	1	30018678	7e-05	0.0627642	1.91e-06	0.000389202	0.00115302	0.00200892	0.563998	0.886399
A	62	AA_A_62	omnibus	5	4	30018696	1.8e-69	0.433528	3.62e-50	2.77e-25	5.08e-18	0.00034416	0.000521843	0.0032191
A	63	AA_A_63	omnibus	3	2	30018699	2.13e-19	0.344044	5.24e-13	0.0039365	1.09e-06	0.0348481	0.0603269	0.0198407
A	65	AA_A_65	logistic	1	2	30018705	0.00590739	0.230974	0.0263047	0.0811592	0.0039949	0.0116944	0.208039	0.0277689
A	66	AA_A_66	logistic	1	2	30018708	6.25e-59	0.846147	6.86e-44	8.14e-26	6.97e-17	0.081256	8.13e-05	0.814869
A	67	AA_A_67	logistic	1	2	30018711	2.57e-05	0.11967	0.0019884	6.09e-06	0.0158237	0.699871	0.00257806	0.219868
A	70	AA_A_70	logistic	1	2	30018720	4.5e-28	0.0765349	5.15e-18	1.32e-08	2.8e-08	0.0424005	0.0071122	0.21858
A	73	AA_A_73	omnibus	2	1	30018729	8.87e-05	0.558954	8.15e-07	0.0136253	0.095032	0.399774	0.974965	0.247096
A	74	AA_A_74	omnibus	2	1	30018732	2.73e-54	0.574362	7.74e-41	3.1e-23	1.95e-12	0.000477175	0.000752603	0.0904661
A	76	AA_A_76	omnibus	3	2	30018738	1.12e-15	0.270384	1.39e-10	1.38e-07	5.7e-05	0.03453	4.49e-05	0.764886
A	77	AA_A_77	omnibus	3	2	30018741	5.89e-09	0.328998	3.26e-07	9.72e-05	0.0315624	0.0620448	0.0669593	0.158871
A	79	AA_A_79	logistic	1	2	30018747	0.116558	0.341214	0.407422	0.237032	0.0335261	0.00914875	0.0650119	0.330412
A	80	AA_A_80	logistic	1	2	30018750	0.116558	0.341214	0.407422	0.237032	0.0335261	0.00914875	0.0650119	0.330412
A	81	AA_A_81	logistic	1	2	30018753	0.116558	0.341214	0.407422	0.237032	0.0335261	0.00914875	0.0650119	0.330412
A	82	AA_A_82	logistic	1	2	30018756	0.116558	0.341214	0.407422	0.237032	0.0335261	0.00914875	0.0650119	0.330412
A	83	AA_A_83	logistic	1	2	30018759	0.116562	0.341216	0.407428	0.237035	0.0335269	0.00914863	0.0650125	0.330411
A	9	AA_A_9	omnibus	4	3	30018537	3.98e-27	0.0780947	2.49e-22	1.35e-06	1.94e-06	0.150922	0.234255	0.00389137
A	90	AA_A_90	logistic	1	2	30018780	4.01e-13	0.867697	1.62e-09	7.84e-08	0.00103647	0.49073	0.00265036	0.869352
A	95	AA_A_95	omnibus	3	2	30019036	2.46e-65	0.710262	1.1e-48	2.64e-27	5.13e-16	0.000330503	0.000238731	0.00768415
A	97	AA_A_97	omnibus	3	2	30019042	9.72e-45	0.624338	6.41e-33	6.73e-21	1.34e-10	0.00170931	0.000611645	0.0453878
A	99	AA_A_99	omnibus	2	1	30019048	0.00522251	0.238049	0.0254546	0.0812635	0.00422454	0.00882497	0.211166	0.0171095
B	0.1	AA_B_.10	omnibus	2	1	31432871	0.0344988	0.292054	0.404534	0.0891367	0.684622	0.840484	2.23e-14	0.849906
B	103	AA_B_103	omnibus	2	1	31432162	0.316992	0.923356	0.0377436	0.349756	0.855258	0.559756	0.0130057	0.756182
B	11	AA_B_11	logistic	1	2	31432683	8.23e-05	0.740253	0.000118969	0.215148	0.376526	0.0170911	1e-21	0.939279
B	0.11	AA_B_.11	omnibus	2	1	31432874	0.0206906	0.0890402	0.259961	0.182751	0.813603	0.00298139	6.18e-19	0.41147
B	113	AA_B_113	omnibus	2	1	31432132	0.0636782	0.546057	0.00814291	0.540955	0.0052211	0.0136163	1.15e-26	0.915606
B	114	AA_B_114	omnibus	3	2	31432129	6.99e-36	0.306709	5.57e-11	0.000640591	3.61e-15	0.163544	8.18e-91	0.00814901
B	116	AA_B_116	omnibus	5	4	31432123	4.37e-08	0.615174	1.6e-07	1.11e-06	0.000564399	0.194547	1.83e-38	0.461411
B	12	AA_B_12	logistic	1	2	31432680	0.0104316	0.432517	0.00979711	0.498532	0.648947	0.00557714	4.51e-20	0.711245
B	131	AA_B_131	omnibus	2	1	31432078	0.00100879	0.754638	0.0754696	0.000217473	0.479362	0.516213	7.82e-11	0.838149
B	143	AA_B_143	omnibus	2	1	31432042	5.49e-07	0.147534	4.52e-06	0.00197003	7.47e-05	0.692914	0.00395625	0.345652
B	145	AA_B_145	omnibus	2	1	31432036	0.00372281	0.422227	0.00182762	0.549477	0.1304	0.850313	0.263667	0.0685471
B	147	AA_B_147	omnibus	2	1	31432030	5.5e-07	0.14694	4.42e-06	0.00197344	7.54e-05	0.695285	0.00397647	0.345608
B	152	AA_B_152	omnibus	2	1	31432015	1.11e-22	0.192524	8.25e-16	5.81e-10	0.00174079	0.887781	1.53e-10	0.000729516
B	156	AA_B_156	omnibus	4	3	31432003	1.57e-17	0.0488295	4.53e-06	6.31e-07	1.79e-06	1.04e-08	2.25e-12	0.129325
B	158	AA_B_158	omnibus	2	1	31431997	1.36e-29	0.16372	1.53e-21	8.48e-17	3.52e-10	0.523652	0.34974	0.0732884
B	0.16	AA_B_.16	omnibus	2	1	31432889	0.100061	0.765171	0.950453	0.215964	0.52256	0.0219264	1.42e-26	0.183038
B	163	AA_B_163	omnibus	3	2	31431982	0.0105849	0.331183	0.19188	0.860367	0.00532323	0.0436651	6.43e-23	0.309098
B	167	AA_B_167	omnibus	2	1	31431970	1.34e-07	0.336724	0.000779553	0.811439	1.58e-05	0.0242051	0.0403915	0.373264
B	171	AA_B_171	omnibus	2	1	31431958	0.0702854	0.21441	0.0044765	0.103694	0.0489345	0.624239	0.000780075	0.0161624
B	177	AA_B_177	omnibus	2	1	31431940	0.000171665	0.91157	0.0227922	7.38e-05	0.327195	0.418584	1.72e-10	0.807044
B	178	AA_B_178	omnibus	2	1	31431937	7.2e-06	0.0597777	0.144031	0.00668981	0.0651469	0.0165318	4.29e-06	0.208633
B	180	AA_B_180	omnibus	2	1	31431931	0.000171549	0.912205	0.0227733	7.37e-05	0.327061	0.418592	1.72e-10	0.806978
B	194	AA_B_194	omnibus	2	1	31431315	1.57e-06	0.056995	5.01e-06	0.00911885	0.00182534	0.605142	0.0475998	0.0549772
B	199	AA_B_199	omnibus	2	1	31431300	3.59e-06	0.357996	0.00406649	0.908566	5.61e-05	0.0379724	0.0612245	0.406103
B	0.21	AA_B_.21	omnibus	2	1	31432904	0.000381252	0.559714	0.0453594	0.00488325	0.309958	0.983652	2.13e-09	0.525718
B	0.23	AA_B_.23	omnibus	2	1	31432910	0.000366143	0.565843	0.0451395	0.00485319	0.304914	0.952938	2.27e-09	0.524347
B	24	AA_B_24	omnibus	3	2	31432644	0.00277023	0.535473	0.145693	0.00819197	0.47283	0.154199	7.9e-23	0.226992
B	282	AA_B_282	omnibus	2	1	31430958	0.0140706	0.0351021	0.0853583	0.216688	0.011396	0.00627025	5.53e-08	0.0327571
B	30	AA_B_30	logistic	1	2	31432626	0.114395	0.232576	0.110158	0.260788	0.391799	0.980132	0.134128	0.517642
B	305	AA_B_305	omnibus	2	1	31430889	0.0108293	0.0494163	0.0748181	0.197303	0.010694	0.00455221	8.58e-08	0.0387821
B	32	AA_B_32	logistic	1	2	31432620	0.000248909	0.27775	0.0146978	0.00229489	0.992315	0.152681	7.72e-25	0.24994
B	325	AA_B_325	omnibus	2	1	31430282	3.15e-06	0.564806	0.00016103	0.000201554	3.42e-05	0.026231	1.11e-09	0.0555855
B	41	AA_B_41	logistic	1	2	31432593	0.00221727	0.158259	0.0707156	0.244913	0.0423884	0.109052	3.12e-05	0.684496
B	45	AA_B_45	omnibus	4	3	31432581	1.18e-09	0.0231594	2.17e-07	0.00869761	0.000109609	0.120693	2.13e-14	0.159612
B	46	AA_B_46	logistic	1	2	31432578	6.72e-07	0.179978	4.38e-06	0.0489424	0.001462	0.032243	0.00429124	0.191903
B	62	AA_B_62	logistic	1	2	31432530	7.6e-11	0.667912	2.47e-08	4.28e-05	0.00854862	0.00130563	0.195923	0.146249
B	63	AA_B_63	logistic	1	2	31432527	0.453426	0.240386	0.0481917	0.527927	0.0433357	0.756943	4.85e-13	0.039864
B	65	AA_B_65	logistic	1	2	31432521	6.09e-11	0.757872	3.07e-08	3.04e-05	0.00864723	0.00143416	0.31649	0.224609
B	66	AA_B_66	omnibus	2	1	31432518	2.24e-11	0.768902	1.64e-09	1.38e-05	0.00736765	0.000301301	0.299032	0.233207
B	67	AA_B_67	omnibus	5	4	31432515	1.13e-48	0.0317042	1.14e-24	7.1e-17	2.09e-09	1.31e-06	9.18e-51	0.143013
B	69	AA_B_69	omnibus	2	1	31432509	4.02e-05	0.564227	0.000190657	1.37e-07	0.00226941	8.42e-06	3.61e-30	0.496846
B	70	AA_B_70	omnibus	4	3	31432506	4.68e-52	0.613969	5.3e-23	2.8e-15	4.25e-07	5.93e-06	8.69e-93	0.0137183
B	71	AA_B_71	logistic	1	2	31432503	5e-05	0.578831	0.000252829	4.58e-07	0.00244366	1.86e-05	1.53e-30	0.501256
B	74	AA_B_74	logistic	1	2	31432494	0.116697	0.81786	0.976892	0.0899224	0.392712	0.995684	6.1e-18	0.466794
B	77	AA_B_77	omnibus	3	2	31432485	4.98e-23	0.3275	2.25e-09	0.00922935	0.00227023	0.0379098	9.31e-77	0.0422687
B	0.8	AA_B_.8	omnibus	2	1	31432865	0.00967573	0.0769102	0.103493	0.0438736	0.696094	0.00938863	9.34e-20	0.578143
B	80	AA_B_80	omnibus	3	2	31432476	0.27707	0.122868	0.0038345	0.00700454	0.0255084	0.0412033	6.77e-31	0.35181
B	81	AA_B_81	logistic	1	2	31432473	6.55e-09	0.620687	1.26e-07	0.0263716	0.0233779	0.0148684	0.000749906	0.912524
B	82	AA_B_82	logistic	1	2	31432470	0.483127	0.274738	0.0030859	0.362048	0.494045	0.013182	5.13e-22	0.208711
B	83	AA_B_83	logistic	1	2	31432467	0.482974	0.274692	0.00308396	0.361958	0.493992	0.0131803	5.15e-22	0.208716
B	9	AA_B_9	omnibus	3	2	31432689	1.28e-19	0.013684	4.68e-08	0.000894609	1.22e-05	0.000436617	4.97e-30	0.0851301
B	94	AA_B_94	logistic	1	2	31432189	0.000488363	0.746251	0.642626	0.550737	1.41e-05	0.00385838	0.0165164	0.614072
B	95	AA_B_95	omnibus	3	2	31432186	0.00100315	0.308842	0.238018	0.961359	3.16e-07	0.0107926	1.37e-06	0.567424
B	97	AA_B_97	omnibus	6	5	31432180	8.28e-56	0.13972	2.94e-26	1.21e-17	1.86e-12	0.00528487	1.28e-90	0.00798998
B	99	AA_B_99	omnibus	2	1	31432174	0.455631	0.0226773	0.0495555	0.174351	0.296108	0.694202	0.00153547	0.860259
C	1	AA_C_1	omnibus	2	1	31347624	0.000435309	0.0133971	5.21e-06	0.015991	0.118608	0.0376302	0.00317099	0.866318
C	103	AA_C_103	logistic	1	2	31347068	0.0173994	0.016704	0.170362	0.523843	0.00295386	0.000609799	0.0111374	0.716313
C	11	AA_C_11	logistic	1	2	31347594	3.73e-16	0.516813	4.28e-12	2.33e-05	0.00124009	0.955957	4.86e-15	0.570754
C	113	AA_C_113	logistic	1	2	31347038	0.713492	0.154645	0.236206	0.513235	0.251001	0.620275	0.602773	0.247771
C	114	AA_C_114	omnibus	2	1	31347035	0.140207	0.0990562	0.130848	0.193738	0.00372457	0.452315	0.0131434	0.135957
C	116	AA_C_116	omnibus	4	3	31347029	1.65e-10	0.219035	0.000145353	0.00260699	8.05e-07	0.00399188	1.2e-07	0.311374
C	138	AA_C_138	logistic	1	2	31346963	7.81e-05	0.176061	0.0067319	0.557973	0.00770023	0.94647	0.0515102	0.0765375
C	14	AA_C_14	logistic	1	2	31347585	0.0025184	0.680481	4.91e-08	0.00627668	0.56765	0.559525	0.168714	0.947027
C	147	AA_C_147	logistic	1	2	31346936	0.792529	0.0864449	0.645701	0.280654	0.649849	0.164494	4.75e-06	0.88687
C	0.15	AA_C_.15	omnibus	2	1	31347799	0.00186196	0.0135477	0.00864075	0.810293	0.0737745	0.29985	0.87765	0.723582
C	152	AA_C_152	omnibus	2	1	31346921	0.00515362	0.195761	0.049077	0.07103	0.121714	0.657013	1.08e-06	0.509222
C	156	AA_C_156	omnibus	5	4	31346909	8.93e-23	0.337981	1.64e-15	0.000351755	1.87e-08	2.18e-06	1.01e-09	0.0197909
C	16	AA_C_16	logistic	1	2	31347579	2.56e-11	0.361938	2.09e-08	0.0122407	0.0163022	0.357686	3.67e-25	0.718392
C	163	AA_C_163	omnibus	3	2	31346888	2.27e-08	0.0457613	9.55e-06	0.087467	0.00341236	0.00273305	6.36e-17	0.824134
C	0.17	AA_C_.17	omnibus	2	1	31347805	0.740689	0.0810549	0.546677	0.271292	0.666665	0.171498	1.69e-06	0.890068
C	173	AA_C_173	logistic	1	2	31346858	0.0179698	0.0166597	0.176013	0.528128	0.00294052	0.000618421	0.0110567	0.718653
C	177	AA_C_177	logistic	1	2	31346846	0.0108376	0.408949	0.159033	0.773396	0.0400627	0.385032	0.122826	0.315699
C	184	AA_C_184	omnibus	2	1	31346238	0.466756	0.0501338	0.463983	0.292135	0.383276	0.124374	1.14e-06	0.820079
C	193	AA_C_193	omnibus	2	1	31346211	2.99e-19	0.160551	3.54e-12	0.0549724	1.23e-09	0.00635748	0.611633	0.0138137
C	194	AA_C_194	omnibus	2	1	31346208	0.461091	0.0483476	0.447225	0.296431	0.393116	0.129628	1.19e-06	0.815124
C	21	AA_C_21	logistic	1	2	31347564	6.78e-08	0.274467	0.000261721	0.112821	2.36e-05	0.00873471	0.000686749	0.786253
C	211	AA_C_211	omnibus	2	1	31346157	6.14e-11	0.359577	6.55e-08	0.0199087	0.018318	0.292529	1.33e-18	0.724308
C	219	AA_C_219	omnibus	2	1	31346133	2.1e-16	0.17869	6.78e-11	0.000150952	2.36e-06	0.0100033	2.17e-05	0.473685
C	24	AA_C_24	logistic	1	2	31347555	0.75432	0.00672888	0.0328346	0.0267524	0.356206	0.723287	0.470176	0.015398
C	248	AA_C_248	omnibus	2	1	31346046	4.17e-19	0.104922	0.00025677	0.000970213	2.48e-07	0.326485	1.11e-35	0.0748284
C	253	AA_C_253	omnibus	2	1	31346031	0.785075	0.0810223	0.633105	0.281833	0.657423	0.174145	1.74e-06	0.886017
C	261	AA_C_261	omnibus	2	1	31346007	0.464288	0.0477157	0.453019	0.295157	0.39141	0.130584	1.18e-06	0.816963
C	267	AA_C_267	omnibus	2	1	31345989	0.787481	0.0797349	0.635984	0.280781	0.659309	0.17444	1.73e-06	0.886952
C	273	AA_C_273	omnibus	2	1	31345971	0.469096	0.0471168	0.457126	0.293197	0.394457	0.131229	1.17e-06	0.818456
C	275	AA_C_275	omnibus	3	2	31345841	0.000102525	0.23511	7.99e-07	0.0283158	0.0143294	0.688656	0.0419091	0.223336
C	285	AA_C_285	omnibus	2	1	31345811	0.457405	0.0473479	0.464323	0.317412	0.386976	0.127286	1.14e-06	0.820223
C	295	AA_C_295	omnibus	2	1	31345781	0.461155	0.0475928	0.399824	0.281962	0.425717	0.135039	1.09e-06	0.825975
C	303	AA_C_303	omnibus	2	1	31345757	0.00212744	0.710031	1.06e-07	0.00561694	0.601099	0.538149	0.155823	0.954327
C	304	AA_C_304	omnibus	2	1	31345754	6.44e-16	0.796899	4.73e-12	0.00291818	0.000160957	0.0135025	3e-06	0.828681
C	305	AA_C_305	omnibus	2	1	31345751	0.484862	0.0460274	0.467201	0.290235	0.410047	0.132227	1.14e-06	0.821061
C	306	AA_C_306	omnibus	2	1	31345748	0.810774	0.0783806	0.650118	0.277117	0.681388	0.176186	1.69e-06	0.890354
C	307	AA_C_307	omnibus	2	1	31345745	0.484475	0.0459127	0.467019	0.290344	0.409858	0.132182	1.14e-06	0.821124
C	326	AA_C_326	omnibus	2	1	31345141	0.45336	0.047005	0.460436	0.321338	0.387708	0.127274	1.16e-06	0.81892
C	339	AA_C_339	omnibus	2	1	31345102	0.454961	0.0458226	0.459581	0.320379	0.387773	0.132223	1.16e-06	0.818649
C	35	AA_C_35	logistic	1	2	31347522	0.000107459	0.150252	0.00986906	0.479299	0.0123605	0.893446	0.0461152	0.106812
C	49	AA_C_49	logistic	1	2	31347480	0.00258853	0.698386	5.4e-08	0.00628218	0.562653	0.560881	0.168404	0.946473
C	6	AA_C_6	logistic	1	2	31347609	7.49e-20	0.090788	0.000174803	0.000554443	6.9e-08	0.269287	3.75e-47	0.0558284
C	66	AA_C_66	logistic	1	2	31347429	0.0408927	0.00734254	0.84523	0.274284	0.00478391	9.9e-06	0.00026419	0.998479
C	73	AA_C_73	logistic	1	2	31347408	0.017963	0.0828625	0.806785	0.181738	0.044847	0.174412	2.92e-13	0.07664
C	77	AA_C_77	logistic	1	2	31347396	0.403338	0.587571	0.350356	0.477101	0.0158238	0.0231253	0.146498	0.824197
C	80	AA_C_80	logistic	1	2	31347387	0.401948	0.587637	0.351541	0.479406	0.0158187	0.0231334	0.146503	0.824208
C	9	AA_C_9	omnibus	4	3	31347600	3.17e-21	0.0296896	2.84e-10	2.25e-05	5.8e-06	0.58651	1.77e-36	0.056178
C	0.9	AA_C_.9	omnibus	2	1	31347781	0.432732	0.0476394	0.377758	0.285362	0.412823	0.125267	1.15e-06	0.820364
C	90	AA_C_90	logistic	1	2	31347357	0.0328691	0.0633458	0.794661	0.0695789	0.135647	0.255151	1.14e-10	0.0917022
C	91	AA_C_91	logistic	1	2	31347104	0.613123	0.0869734	0.425548	0.231209	0.647308	0.0296229	0.442936	0.476252
C	94	AA_C_94	logistic	1	2	31347095	0.0336637	0.0907367	0.400369	0.735259	0.000930397	0.000684746	0.00907697	0.911934
C	95	AA_C_95	omnibus	3	2	31347092	0.00314139	0.0627107	0.0228496	0.047797	0.0168616	0.00130869	0.0204822	0.408149
C	97	AA_C_97	omnibus	2	1	31347086	4.28e-05	0.67885	1.64e-08	0.176788	0.100041	0.000312804	3.76e-06	0.199753
C	99	AA_C_99	omnibus	4	3	31347080	2.74e-21	0.436845	2.88e-10	0.000161367	2.77e-06	0.169226	5.52e-34	0.285238
DPA1	11	AA_DPA1_11	logistic	1	2	33145617	2.87e-06	0.70694	0.0350187	0.0240539	0.000655132	0.00681487	0.283295	0.663064
DPA1	111	AA_DPA1_111	omnibus	2	1	33144977	4.33e-12	0.174038	2.14e-06	0.0048259	0.00270817	6.02e-06	0.0742095	0.213393
DPA1	127	AA_DPA1_127	omnibus	2	1	33144929	4.34e-12	0.177701	2.04e-06	0.00470683	0.0027589	5.86e-06	0.0731231	0.213059
DPA1	160	AA_DPA1_160	omnibus	2	1	33144830	4.87e-12	0.176494	2.03e-06	0.00578909	0.00268737	5.78e-06	0.0728358	0.21217
DPA1	228	AA_DPA1_228	omnibus	2	1	33144412	4.95e-12	0.177697	2.01e-06	0.00581524	0.00274778	5.62e-06	0.0726171	0.212382
DPA1	31	AA_DPA1_31	logistic	1	2	33145557	8.82e-12	0.180308	3.77e-06	0.00588403	0.00312094	2.04e-05	0.0832099	0.225485
DPA1	50	AA_DPA1_50	logistic	1	2	33145500	8.83e-12	0.184045	3.58e-06	0.00575177	0.00314716	2.07e-05	0.0821551	0.225191
DPA1	83	AA_DPA1_83	logistic	1	2	33145401	3.64e-11	0.16757	5.47e-06	0.0101963	0.00448434	2.64e-05	0.124626	0.215296
DPB1	11	AA_DPB1_11	logistic	1	2	33156445	0.0195815	0.139541	7.61e-11	0.108669	2.85e-05	0.00104995	0.969498	0.939276
DPB1	170	AA_DPB1_170	omnibus	2	1	33160936	3.42e-12	0.106305	2.24e-18	3.75e-05	0.72967	6.94e-07	0.0443778	0.489821
DPB1	178	AA_DPB1_178	omnibus	2	1	33160960	0.580655	0.768233	0.912836	0.219925	0.831193	0.000188695	0.231769	0.218416
DPB1	194	AA_DPB1_194	omnibus	2	1	33161555	6.64e-13	0.659696	4.2e-05	0.000628511	8.49e-08	0.052519	3.04e-05	0.255182
DPB1	205	AA_DPB1_205	omnibus	2	1	33161588	2.28e-07	0.396651	0.0103855	0.0143955	0.000877074	0.00102011	0.207468	0.499775
DPB1	33	AA_DPB1_33	logistic	1	2	33156511	4.1e-05	0.61268	0.000769339	0.242928	0.00653335	0.0334043	0.0273031	0.154613
DPB1	35	AA_DPB1_35	omnibus	3	2	33156517	3.29e-22	0.63482	1.54e-10	1.23e-05	1.91e-10	3.98e-05	0.0479511	0.434303
DPB1	36	AA_DPB1_36	logistic	1	2	33156520	7.05e-28	0.258329	1.19e-14	1.56e-08	1.74e-17	0.0241038	0.949196	0.792995
DPB1	55	AA_DPB1_55	omnibus	3	2	33156577	3.88e-37	0.491161	4.25e-16	4.43e-12	5.33e-22	6.79e-05	0.550623	0.74092
DPB1	56	AA_DPB1_56	logistic	1	2	33156580	1.37e-36	0.291776	4.64e-17	6.3e-12	2.38e-22	0.0008821	0.735906	0.64519
DPB1	57	AA_DPB1_57	logistic	1	2	33156583	0.0436553	0.0510187	6.46e-09	0.00733304	5.68e-05	0.0631739	0.272665	0.94552
DPB1	65	AA_DPB1_65	logistic	1	2	33156607	0.00187016	0.0351387	1.52e-10	0.0101961	0.0176545	0.00785042	0.741243	0.766806
DPB1	69	AA_DPB1_69	omnibus	3	2	33156619	1.33e-41	0.665484	1.24e-32	1.7e-21	5.79e-13	0.018743	0.0789572	0.0876237
DPB1	76	AA_DPB1_76	omnibus	3	2	33156640	0.000860933	0.0109824	2.39e-08	0.103516	0.00204834	0.000229385	0.000933787	0.507714
DPB1	8	AA_DPB1_8	logistic	1	2	33156436	1.96e-09	0.0723966	2.66e-17	0.00060922	0.216723	9.34e-05	0.0743539	0.394153
DPB1	84	AA_DPB1_84	omnibus	2	1	33156664	5.59e-13	0.261943	2.13e-19	4.12e-05	0.66618	2.53e-06	0.0233353	0.572514
DPB1	85	AA_DPB1_85	logistic	1	2	33156667	8.68e-13	0.25996	1.7e-18	5.68e-05	0.66204	5.51e-06	0.0262569	0.574708
DPB1	86	AA_DPB1_86	logistic	1	2	33156670	7.91e-13	0.276383	1.79e-18	5.61e-05	0.671017	5.53e-06	0.026342	0.576255
DPB1	87	AA_DPB1_87	logistic	1	2	33156673	8.67e-13	0.259885	1.68e-18	5.68e-05	0.661565	5.51e-06	0.0262452	0.574694
DPB1	9	AA_DPB1_9	omnibus	3	2	33156439	1.73e-13	0.112464	4.93e-20	0.000174889	2.91e-05	0.000268361	0.107189	0.556702
DPB1	96	AA_DPB1_96	omnibus	2	1	33160714	3.39e-12	0.111433	2.28e-18	3.76e-05	0.729152	6.98e-07	0.0444374	0.503908
DQA1	107	AA_DQA1_107	omnibus	2	1	32717784	9.54e-38	1.46e-08	3.45e-32	1.88e-07	7.54e-13	0.613824	0.977371	0.829094
DQA1	11	AA_DQA1_11	omnibus	2	1	32717083	0.186112	0.00715364	0.428269	0.26336	0.458712	1.8e-07	0.708231	0.868722
DQA1	129	AA_DQA1_129	omnibus	2	1	32717850	7.61e-08	0.0243543	1.63e-06	0.00325042	0.254532	0.000268424	0.416297	0.850238
DQA1	130	AA_DQA1_130	omnibus	2	1	32717853	3.41e-13	0.283958	1.32e-12	1.28e-12	0.000398223	0.000266135	0.379497	0.493463
DQA1	156	AA_DQA1_156	omnibus	2	1	32717931	9.64e-38	1.47e-08	3.53e-32	1.89e-07	7.61e-13	0.610643	0.980055	0.829695
DQA1	0.16	AA_DQA1_.16	omnibus	2	1	32713236	1.82e-36	0.0736874	7.82e-33	1.12e-20	1.64e-14	1.13e-05	0.0235502	0.171054
DQA1	161	AA_DQA1_161	omnibus	2	1	32717946	9.64e-38	1.47e-08	3.53e-32	1.89e-07	7.61e-13	0.610642	0.980056	0.829696
DQA1	163	AA_DQA1_163	omnibus	2	1	32717952	9.64e-38	1.47e-08	3.53e-32	1.89e-07	7.61e-13	0.610651	0.980049	0.829693
DQA1	175	AA_DQA1_175	omnibus	3	2	32717988	2e-43	1.08e-07	2.83e-38	2.05e-10	5.84e-17	1.85e-08	0.902039	0.93267
DQA1	18	AA_DQA1_18	logistic	1	2	32717104	0.186359	0.00771274	0.42855	0.264976	0.460941	3.85e-07	0.71235	0.870894
DQA1	187	AA_DQA1_187	omnibus	2	1	32718380	1.56e-49	0.176295	6.6e-63	2.74e-27	3.12e-22	2.52e-24	0.401731	0.206238
DQA1	207	AA_DQA1_207	omnibus	2	1	32718440	7.38e-25	0.430902	1.26e-10	6.11e-08	3.16e-09	2.7e-08	0.0609392	0.0573565
DQA1	215	AA_DQA1_215	omnibus	2	1	32718464	2.68e-151	0.00051839	4.46e-142	3.49e-55	9.49e-53	1.08e-06	0.0137	0.0958458
DQA1	218	AA_DQA1_218	omnibus	2	1	32718473	0.187756	0.00722228	0.430336	0.264697	0.459693	1.95e-07	0.711999	0.871846
DQA1	25	AA_DQA1_25	logistic	1	2	32717125	6.39e-28	0.00242031	1.83e-15	0.012807	5.93e-09	3.79e-12	0.010708	0.718443
DQA1	26	AA_DQA1_26	logistic	1	2	32717128	4.04e-46	0.184946	8.71e-51	1.21e-21	3.48e-20	2.35e-26	0.409376	0.217701
DQA1	34	AA_DQA1_34	logistic	1	2	32717152	1.46e-91	3.15e-06	6.52e-98	9.11e-34	9.79e-25	7.57e-08	0.95789	0.792362
DQA1	40	AA_DQA1_40	logistic	1	2	32717170	1.48e-150	5.88e-11	4.05e-129	1.43e-43	1.11e-46	0.742347	0.0305931	0.117701
DQA1	41	AA_DQA1_41	logistic	1	2	32717173	1.36e-13	0.301814	1.61e-13	3.02e-14	0.000268628	0.0011907	0.396273	0.482305
DQA1	45	AA_DQA1_45	logistic	1	2	32717185	0.186525	0.00771357	0.428664	0.2649	0.460802	3.84e-07	0.71263	0.870933
DQA1	47	AA_DQA1_47	omnibus	4	3	32717191	2.03e-215	1.39e-09	1.33e-187	8.9e-66	2.88e-66	3.51e-29	0.0216773	0.301264
DQA1	48	AA_DQA1_48	logistic	1	2	32717194	0.192492	0.00757527	0.438882	0.262637	0.453705	3.95e-07	0.708035	0.867003
DQA1	50	AA_DQA1_50	omnibus	3	2	32717200	3.54e-207	1.01e-09	2.55e-187	9.08e-67	1.26e-66	9.44e-08	0.0229008	0.162935
DQA1	51	AA_DQA1_51	logistic	1	2	32717203	1.41e-150	6.05e-11	3.63e-129	1.36e-43	1.04e-46	0.749902	0.0303892	0.117473
DQA1	52	AA_DQA1_52	omnibus	3	2	32717206	2.65e-101	2.21e-06	3.53e-69	9.74e-22	6.33e-25	4.27e-22	0.0351965	0.68849
DQA1	53	AA_DQA1_53	omnibus	3	2	32717209	3.12e-207	1.06e-09	2.26e-187	8.97e-67	1.18e-66	9.89e-08	0.0227768	0.162342
DQA1	54	AA_DQA1_54	logistic	1	2	32717212	2.26e-78	0.00163828	3.54e-47	4.45e-17	2.21e-21	5.29e-09	0.0159819	0.401382
DQA1	55	AA_DQA1_55	logistic	1	2	32717215	0.188536	0.00774303	0.430874	0.264253	0.457645	3.87e-07	0.712062	0.870432
DQA1	56	AA_DQA1_56	omnibus	3	2	32717218	1.8e-59	0.00100063	2.63e-72	5.96e-28	2.64e-23	2.21e-23	0.70579	0.421411
DQA1	61	AA_DQA1_61	logistic	1	2	32717233	0.188947	0.00775347	0.430945	0.264351	0.456544	3.88e-07	0.712158	0.869972
DQA1	64	AA_DQA1_64	logistic	1	2	32717242	0.1891	0.00775965	0.431416	0.264071	0.456887	3.88e-07	0.711883	0.870067
DQA1	66	AA_DQA1_66	logistic	1	2	32717248	0.189205	0.00775926	0.43164	0.263949	0.456932	3.89e-07	0.711754	0.870175
DQA1	69	AA_DQA1_69	omnibus	3	2	32717257	2.1e-206	0.00326985	5.62e-163	1.2e-74	1.09e-62	5.42e-07	7.35e-06	0.00669178
DQA1	75	AA_DQA1_75	logistic	1	2	32717275	3.43e-38	5.96e-09	2.96e-33	1.06e-07	3.26e-13	0.616467	0.976266	0.828079
DQA1	76	AA_DQA1_76	omnibus	3	2	32717278	1.74e-59	0.00100016	2.81e-72	5.93e-28	2.44e-23	2.21e-23	0.705746	0.421412
DQA1	80	AA_DQA1_80	logistic	1	2	32717290	0.188185	0.00774812	0.431996	0.264304	0.460281	3.87e-07	0.712003	0.8704
DQB1	0.1	AA_DQB1_.10	omnibus	3	2	32742295	6.56e-41	0.411943	9.26e-23	4.93e-12	1.23e-13	4.33e-05	0.000268277	0.485941
DQB1	116	AA_DQB1_116	omnibus	2	1	32737940	1.08e-07	0.0551658	0.0836837	0.0285713	2.99e-09	0.266971	0.00139383	0.0359111
DQB1	125	AA_DQB1_125	omnibus	3	2	32737913	1.01e-12	0.0214474	0.0338582	0.0881587	1.19e-10	8.46e-13	0.00112156	0.055906
DQB1	126	AA_DQB1_126	omnibus	2	1	32737910	1.58e-07	0.666842	0.000411805	0.0634781	3.34e-06	0.482075	0.271081	0.261483
DQB1	13	AA_DQB1_13	omnibus	2	1	32740798	2.13e-22	1.91e-05	4.87e-13	0.00543674	5.6e-07	4.74e-06	0.0152574	0.844073
DQB1	130	AA_DQB1_130	omnibus	2	1	32737898	0.002942	0.808047	0.690827	0.04655	0.00726888	0.00047002	0.467051	0.522329
DQB1	135	AA_DQB1_135	omnibus	2	1	32737883	2.32e-62	0.0040742	7.09e-46	1.16e-13	1.48e-18	2.86e-06	0.143211	0.431007
DQB1	14	AA_DQB1_14	omnibus	2	1	32740795	9.5e-08	0.0470997	0.115891	0.0215784	1.65e-09	0.202827	0.00107305	0.0403206
DQB1	140	AA_DQB1_140	omnibus	2	1	32737868	2.43e-35	0.000386356	1.28e-19	1.99e-06	6.49e-08	1e-16	0.004638	0.378698
DQB1	167	AA_DQB1_167	omnibus	2	1	32737787	2.06e-22	2.01e-05	4.22e-13	0.0056152	5.52e-07	4.95e-06	0.0155158	0.838226
DQB1	0.17	AA_DQB1_.17	omnibus	2	1	32742316	0.688773	0.334307	0.316068	0.820568	0.136627	0.0657229	0.513952	0.914216
DQB1	0.18	AA_DQB1_.18	omnibus	3	2	32742319	0.00659643	0.00872889	0.0710258	0.00167225	0.0259395	0.184584	0.34248	0.701797
DQB1	182	AA_DQB1_182	omnibus	2	1	32737742	2.41e-35	0.000385086	1.23e-19	1.99e-06	6.66e-08	9.98e-17	0.00462937	0.379187
DQB1	185	AA_DQB1_185	omnibus	2	1	32737733	2.09e-06	0.803412	0.00104918	0.00914839	0.270281	8.45e-08	0.315234	0.489249
DQB1	203	AA_DQB1_203	omnibus	2	1	32737170	0.435714	0.0108336	0.775805	0.167996	0.291814	8.18e-08	0.73578	0.726059
DQB1	0.21	AA_DQB1_.21	omnibus	3	2	32742328	0.750849	0.00891916	0.463814	0.335653	0.103901	3.65e-06	0.702037	0.949172
DQB1	220	AA_DQB1_220	omnibus	2	1	32737119	0.172833	0.00715347	0.482542	0.293447	0.491432	8.72e-08	0.750165	0.931384
DQB1	221	AA_DQB1_221	omnibus	2	1	32737116	0.174289	0.00722163	0.484727	0.294925	0.489653	9.08e-08	0.748301	0.935664
DQB1	224	AA_DQB1_224	omnibus	2	1	32737107	1.08e-07	0.0574158	0.0828156	0.0270993	3.24e-09	0.288684	0.00133011	0.0355805
DQB1	26	AA_DQB1_26	omnibus	3	2	32740759	3.75e-150	0.000109716	3.78e-88	1.1e-37	1.16e-58	1.12e-07	4.07e-10	0.00275708
DQB1	0.27	AA_DQB1_.27	omnibus	3	2	32742346	6.12e-07	0.0970617	0.103245	0.0837194	1.06e-08	0.102366	0.0055507	0.101379
DQB1	28	AA_DQB1_28	logistic	1	2	32740753	1.82e-39	0.31137	4.8e-22	1.26e-11	8.24e-13	0.000171312	0.000214971	0.237532
DQB1	30	AA_DQB1_30	omnibus	3	2	32740747	5.84e-46	0.0998606	1.12e-25	8.14e-16	2.73e-17	1.23e-06	0.000310918	0.0266426
DQB1	37	AA_DQB1_37	omnibus	2	1	32740726	1.89e-41	0.347329	6.28e-24	6.96e-13	1.41e-13	9.1e-05	8.33e-05	0.228544
DQB1	38	AA_DQB1_38	logistic	1	2	32740723	2.89e-14	0.0159062	6.09e-14	9.13e-06	0.0703042	0.0219104	0.505109	0.675161
DQB1	0.4	AA_DQB1_.4	omnibus	3	2	32742277	0.74574	0.00895237	0.498755	0.33535	0.110177	3.84e-06	0.701244	0.950224
DQB1	45	AA_DQB1_45	logistic	1	2	32740702	2.32e-26	3.85e-06	1.96e-15	0.00109488	1.99e-08	1.22e-06	0.0112846	0.681506
DQB1	46	AA_DQB1_46	logistic	1	2	32740699	1.72e-39	0.30826	4.83e-22	1.21e-11	8.08e-13	0.000171146	0.000214558	0.237388
DQB1	47	AA_DQB1_47	logistic	1	2	32740696	1.7e-39	0.308117	4.83e-22	1.21e-11	8.06e-13	0.000170961	0.000214402	0.237329
DQB1	0.5	AA_DQB1_.5	omnibus	4	3	32742280	4.46e-11	0.0225812	0.0295617	0.17594	2.15e-09	9.9e-11	0.0037431	0.109731
DQB1	52	AA_DQB1_52	logistic	1	2	32740681	1.76e-39	0.308241	5.01e-22	1.21e-11	8.05e-13	0.000171284	0.000214497	0.237372
DQB1	53	AA_DQB1_53	logistic	1	2	32740678	0.189012	0.0075817	0.431584	0.283528	0.457713	5.07e-07	0.715675	0.869492
DQB1	55	AA_DQB1_55	omnibus	3	2	32740672	2.67e-49	0.00893061	2.95e-35	1.27e-20	6.9e-17	3.33e-14	0.000386079	0.360547
DQB1	56	AA_DQB1_56	logistic	1	2	32740669	4.01e-188	0.115887	3.77e-172	1.02e-85	4.82e-68	0.0530008	1.12e-07	0.000862575
DQB1	57	AA_DQB1_57	omnibus	4	3	32740666	4.67e-83	0.0593698	1.68e-65	1.33e-27	3.55e-32	0.0412625	0.000339719	0.224935
DQB1	0.6	AA_DQB1_.6	omnibus	3	2	32742283	0.755435	0.0089668	0.46722	0.336507	0.109339	3.85e-06	0.701495	0.950118
DQB1	66	AA_DQB1_66	logistic	1	2	32740639	0.0395533	0.581564	4.48e-05	0.0305902	0.707141	0.00561808	0.14789	0.926787
DQB1	67	AA_DQB1_67	logistic	1	2	32740636	0.0395608	0.581547	4.48e-05	0.0305928	0.707177	0.00561768	0.147885	0.926775
DQB1	70	AA_DQB1_70	omnibus	3	2	32740627	7.41e-195	0.0112967	1.54e-151	4.78e-72	5.72e-61	6.63e-05	6.51e-06	0.0111373
DQB1	71	AA_DQB1_71	omnibus	4	3	32740624	6.17e-217	0.0606221	1.66e-157	4.52e-72	8.61e-71	0.000279794	3.32e-09	0.00352025
DQB1	74	AA_DQB1_74	omnibus	3	2	32740615	2.63e-109	0.217571	3.86e-64	4.46e-33	8.59e-44	0.000280307	3.58e-08	0.00468523
DQB1	75	AA_DQB1_75	logistic	1	2	32740612	1.16e-10	0.0852313	7.24e-08	8.48e-05	1.18e-07	0.0973606	0.222288	0.0919853
DQB1	77	AA_DQB1_77	logistic	1	2	32740606	1.91e-12	0.0232662	1.21e-12	3.81e-05	0.145585	0.0228314	0.517962	0.565876
DQB1	84	AA_DQB1_84	omnibus	2	1	32740585	0.178129	0.00686911	0.499341	0.319557	0.491955	1.02e-07	0.759632	0.840393
DQB1	85	AA_DQB1_85	omnibus	2	1	32740582	0.178137	0.00686918	0.499364	0.319557	0.491955	1.02e-07	0.75963	0.84039
DQB1	86	AA_DQB1_86	omnibus	3	2	32740579	0.0107816	0.0145247	0.785598	0.0442225	0.00989602	8.57e-08	0.679273	0.766903
DQB1	87	AA_DQB1_87	omnibus	3	2	32740576	8.66e-08	0.0246421	0.0559789	0.52384	5.02e-06	5.2e-10	0.00651555	0.149354
DQB1	89	AA_DQB1_89	omnibus	2	1	32740570	0.171044	0.00686707	0.484131	0.319696	0.502822	1.02e-07	0.759654	0.843198
DQB1	9	AA_DQB1_9	omnibus	2	1	32740810	9.2e-14	0.556088	1.8e-19	1.12e-08	0.0030076	0.00122318	0.540098	0.412668
DQB1	0.9	AA_DQB1_.9	omnibus	3	2	32742292	6.56e-07	0.0974317	0.115266	0.0856935	1.11e-08	0.116356	0.00554256	0.101369
DQB1	90	AA_DQB1_90	omnibus	2	1	32740567	0.171477	0.00686802	0.485336	0.31967	0.50277	1.02e-07	0.759635	0.840383
DRB1	0.1	AA_DRB1_.1	omnibus	3	2	32665412	2.8e-194	0.18511	9.26e-145	1.87e-61	1.6e-62	6.73e-06	1.38e-05	0.000712316
DRB1	10	AA_DRB1_10	omnibus	2	1	32660118	4.41e-177	1.98e-08	2.99e-158	6.43e-57	4.62e-58	0.00265862	0.548174	0.0194141
DRB1	104	AA_DRB1_104	omnibus	2	1	32657566	1.51e-152	0.000310675	3.34e-143	3.45e-55	1.62e-53	6.45e-07	0.0137456	0.096846
DRB1	11	AA_DRB1_11	omnibus	6	5	32660115	7.08e-245	1.27e-06	1.18e-203	5.09e-80	1.07e-79	7.53e-30	8.53e-06	0.0115646
DRB1	12	AA_DRB1_12	logistic	1	2	32660112	3.17e-170	1.76e-08	5.16e-147	1.85e-54	3.36e-57	0.00300182	0.547411	0.0184876
DRB1	120	AA_DRB1_120	omnibus	2	1	32657518	9.82e-62	0.188061	7.87e-75	1.97e-34	3e-28	5.63e-26	0.185733	0.0395745
DRB1	13	AA_DRB1_13	omnibus	6	5	32660109	1.1226728276206e-311	1.31e-06	9e-256	1.05e-104	4.29e-99	3.65e-31	2.18e-08	0.00741467
DRB1	133	AA_DRB1_133	omnibus	2	1	32657479	9.41e-29	0.20359	1.61e-15	9.52e-09	4.63e-09	1.05e-05	0.0445531	0.0373705
DRB1	14	AA_DRB1_14	logistic	1	2	32660106	2.02e-78	0.00148026	5.78e-47	6.52e-17	1.62e-21	4.71e-09	0.0150251	0.393461
DRB1	140	AA_DRB1_140	omnibus	2	1	32657458	1.83e-64	1.86e-06	7.85e-48	6.16e-14	3.29e-16	1.55e-10	0.663592	0.445431
DRB1	142	AA_DRB1_142	omnibus	2	1	32657452	9.44e-29	0.203614	1.61e-15	9.53e-09	4.63e-09	1.06e-05	0.0445608	0.0373756
DRB1	149	AA_DRB1_149	omnibus	2	1	32657431	3.76e-177	1.25e-08	2.98e-158	4.71e-57	5.46e-58	0.00214571	0.55465	0.0190732
DRB1	16	AA_DRB1_16	omnibus	2	1	32660100	7.53e-166	0.0230129	9.98e-132	2.04e-58	1.07e-48	0.170741	2.21e-05	0.00851402
DRB1	0.16	AA_DRB1_.16	omnibus	3	2	32665457	1.15e-255	1.26e-07	9.57e-218	1.64e-83	1.97e-83	0.000760799	4.95e-05	0.00455558
DRB1	0.17	AA_DRB1_.17	omnibus	3	2	32665460	5.74e-170	0.0218378	1.02e-134	5.98e-56	2.11e-53	0.0161118	1.36e-06	0.0108322
DRB1	180	AA_DRB1_180	omnibus	3	2	32657338	4.22e-228	0.305254	2.8e-200	2.06e-90	2.02e-78	3.38e-26	4.32e-06	0.00540357
DRB1	181	AA_DRB1_181	omnibus	3	2	32657335	6.75e-247	0.00425892	2.94e-189	1.91e-80	1.07e-72	4.32e-08	2.45e-07	0.015622
DRB1	189	AA_DRB1_189	omnibus	2	1	32656611	4e-175	0.182627	7.05e-143	2.56e-60	1.51e-53	0.124683	5.46e-05	0.00385713
DRB1	231	AA_DRB1_231	omnibus	2	1	32656010	2.62e-175	0.179425	8.16e-143	2e-60	1.14e-53	0.122932	5.3e-05	0.00376524
DRB1	233	AA_DRB1_233	omnibus	3	2	32656004	3.58e-254	1.22e-06	3.83e-219	3.54e-84	1.3e-80	0.000334152	0.000239647	0.00499946
DRB1	0.24	AA_DRB1_.24	omnibus	3	2	32665481	1.6e-203	0.211976	1.21e-182	1.59e-77	1.31e-71	6.03e-26	8e-05	0.0039633
DRB1	25	AA_DRB1_25	logistic	1	2	32660073	2.09e-78	0.00148286	6.13e-47	6.51e-17	1.61e-21	4.7e-09	0.0150129	0.393248
DRB1	0.25	AA_DRB1_.25	omnibus	3	2	32665484	5.88e-256	1.28e-07	6.6e-218	1.48e-83	1.61e-83	0.000746068	4.75e-05	0.00445011
DRB1	26	AA_DRB1_26	omnibus	3	2	32660070	8.72e-05	0.209229	0.166401	0.00432752	0.0414093	0.284167	8.77e-07	0.577685
DRB1	28	AA_DRB1_28	omnibus	3	2	32660064	1.76e-27	0.000850941	1.92e-23	1.93e-05	3.55e-08	0.00167852	0.131746	0.318863
DRB1	30	AA_DRB1_30	omnibus	5	4	32660058	6.02e-90	0.000592088	5.27e-60	1.85e-20	7.93e-24	2.68e-09	6.83e-06	0.313333
DRB1	31	AA_DRB1_31	omnibus	2	1	32660055	1.64e-07	0.0180466	0.019991	0.000265511	0.000124072	0.165171	1.54e-06	0.0711428
DRB1	32	AA_DRB1_32	logistic	1	2	32660052	0.0276556	0.183148	0.000126574	0.18287	0.0972784	3.29e-05	0.000524174	0.899754
DRB1	33	AA_DRB1_33	logistic	1	2	32660049	9.53e-54	0.178912	4.09e-55	4.38e-24	1.86e-24	4.18e-27	0.368607	0.0905594
DRB1	37	AA_DRB1_37	omnibus	5	4	32660037	1.54e-93	0.000143806	8.16e-69	4.88e-22	2.79e-16	1.66e-26	4.91e-05	0.945392
DRB1	38	AA_DRB1_38	omnibus	2	1	32660034	0.0545309	0.301995	0.0247589	0.17715	0.806184	0.671883	0.202326	0.774146
DRB1	4	AA_DRB1_4	omnibus	2	1	32665400	8.48e-76	0.000713562	2.73e-54	1.2e-17	2.63e-19	3.97e-10	0.0189305	0.757701
DRB1	47	AA_DRB1_47	logistic	1	2	32660007	2.14e-08	0.000309061	1.44e-16	0.000216233	0.0246996	1.19e-10	0.0277079	0.216894
DRB1	57	AA_DRB1_57	omnibus	4	3	32659977	3.51e-190	0.023858	2.05e-142	3.11e-57	6.14e-60	3.19e-10	0.00718407	0.0493315
DRB1	58	AA_DRB1_58	omnibus	2	1	32659974	6.16e-94	6.13e-10	3.45e-62	4.02e-23	1.65e-33	0.517362	0.00105528	0.0838308
DRB1	60	AA_DRB1_60	omnibus	3	2	32659968	7.06e-62	0.0178359	1.16e-42	1.08e-13	7.3e-20	5.98e-09	0.097883	0.248891
DRB1	67	AA_DRB1_67	omnibus	3	2	32659947	1.36e-276	2.37e-09	2.5e-197	1.37e-83	1.72e-95	5.08e-29	1.96e-07	0.000249656
DRB1	70	AA_DRB1_70	omnibus	3	2	32659938	6.16e-81	0.125175	6.49e-79	5.25e-36	4.72e-29	2.05e-12	0.0362582	0.023297
DRB1	71	AA_DRB1_71	omnibus	4	3	32659935	7.74e-75	0.206862	6.25e-48	2.47e-31	1.41e-28	4.29e-16	0.000108	0.0118661
DRB1	73	AA_DRB1_73	logistic	1	2	32659929	1.12e-61	0.104853	1.32e-33	5.57e-18	4.8e-18	2.22e-08	1.3e-05	0.160397
DRB1	74	AA_DRB1_74	omnibus	5	4	32659926	3.08e-264	0.00205445	6.09e-200	2.7e-84	4.54e-78	1.95e-10	2.43e-08	0.0095635
DRB1	77	AA_DRB1_77	logistic	1	2	32659917	0.00551325	0.228031	0.48384	0.00680723	0.117763	0.204408	0.000776521	0.315313
DRB1	78	AA_DRB1_78	logistic	1	2	32659914	6.57e-67	0.00129251	1.22e-42	1.66e-14	2.64e-17	2.56e-08	0.0250421	0.758497
DRB1	85	AA_DRB1_85	logistic	1	2	32659893	0.816909	0.592486	0.750606	0.402305	0.549866	0.231657	0.222673	0.859375
DRB1	86	AA_DRB1_86	logistic	1	2	32659890	0.075772	0.701843	0.906806	0.609255	0.726078	3.8e-06	0.00118812	0.274746
DRB1	9	AA_DRB1_9	omnibus	3	2	32660121	1.73e-68	1.69e-05	5.4e-49	1.33e-14	5.24e-18	4.65e-10	0.875969	0.20541
DRB1	96	AA_DRB1_96	omnibus	4	3	32657590	8.58e-102	0.00672128	5.52e-99	1.28e-44	1.47e-39	4.51e-26	7.8e-06	0.0118997
DRB1	98	AA_DRB1_98	omnibus	2	1	32657584	1.57e-152	0.000310401	3.54e-143	3.45e-55	1.63e-53	6.43e-07	0.0137413	0.0968302
gw_060011	32292307	gw_060011	logistic	1	2	32292307	0.0424303	0.827899	0.0459446	0.120455	0.0846343	0.799025	0.0454899	0.0790646
gw_060012	32292388	gw_060012	logistic	1	2	32292388	4.36e-05	0.74298	0.000355431	0.00793838	0.00256031	0.55947	0.0921827	0.038124
HLA_A	1	HLA_A_01	logistic	1	2	30019970	2.88e-05	0.139876	0.00213311	6.33e-06	0.0184143	0.686509	0.00259774	0.216772
HLA_A	101	HLA_A_0101	logistic	1	2	30019970	2.72e-05	0.158403	0.00240028	6.71e-06	0.015695	0.676823	0.00268969	0.212869
HLA_A	2	HLA_A_02	logistic	1	2	30019970	2.05e-54	0.557905	3.18e-41	1.38e-24	1.85e-12	0.000360721	0.000708391	0.0898862
HLA_A	201	HLA_A_0201	logistic	1	2	30019970	4.58e-58	0.770481	3.25e-45	2.79e-25	2.76e-13	0.000467698	0.000822836	0.0895401
HLA_A	3	HLA_A_03	logistic	1	2	30019970	1.67e-09	0.238715	4.89e-07	0.00521833	0.00513497	0.0921267	0.0212235	0.866327
HLA_A	301	HLA_A_0301	logistic	1	2	30019970	3.39e-09	0.270415	1.26e-06	0.00859282	0.00384517	0.106637	0.018517	0.912005
HLA_A	11	HLA_A_11	logistic	1	2	30019970	1.13e-06	0.0771292	3.42e-05	0.0169575	0.0946008	0.424876	0.858219	0.604248
HLA_A	1101	HLA_A_1101	logistic	1	2	30019970	9.09e-07	0.069977	3.37e-05	0.017138	0.0826277	0.427879	0.860929	0.606353
HLA_A	23	HLA_A_23	logistic	1	2	30019970	0.041021	0.543306	0.655403	0.11315	0.051209	0.308207	0.207646	0.399272
HLA_A	2301	HLA_A_2301	logistic	1	2	30019970	0.0411628	0.543253	0.655243	0.114352	0.0511905	0.307627	0.207637	0.399263
HLA_A	24	HLA_A_24	logistic	1	2	30019970	7.76e-05	0.132976	0.0256027	0.00886356	3.43e-05	0.0273006	0.0487401	0.0328338
HLA_A	2402	HLA_A_2402	logistic	1	2	30019970	7.57e-05	0.127001	0.0237173	0.00803868	3.13e-05	0.0220933	0.0446048	0.0297189
HLA_A	26	HLA_A_26	logistic	1	2	30019970	0.0459172	0.309427	0.0352849	0.514191	0.774685	0.348636	0.42273	0.221212
HLA_A	2601	HLA_A_2601	logistic	1	2	30019970	0.0441096	0.315129	0.0345816	0.523384	0.79134	0.334188	0.43103	0.155333
HLA_A	29	HLA_A_29	logistic	1	2	30019970	1.01e-16	0.160341	2.58e-10	0.00974669	3.07e-06	0.0609471	0.0394149	0.130125
HLA_A	2902	HLA_A_2902	logistic	1	2	30019970	3.64e-18	0.0628362	2.76e-10	0.00125921	1.85e-06	0.0422765	0.0538144	0.156943
HLA_A	30	HLA_A_30	logistic	1	2	30019970	0.0213707	0.0213757	0.00531179	0.0462765	0.00338298	0.00962789	0.322515	0.304951
HLA_A	3001	HLA_A_3001	logistic	1	2	30019970	0.0269257	0.166539	0.0352228	0.209965	0.0292841	0.0288636	0.150652	0.729627
HLA_A	31	HLA_A_31	logistic	1	2	30019970	0.00122462	0.889885	0.000412675	0.0187299	0.141408	0.0632037	0.87173	0.451087
HLA_A	3101	HLA_A_3101	logistic	1	2	30019970	0.00172043	0.862863	0.000514262	0.0202567	0.159861	0.0590862	0.889787	0.459853
HLA_A	32	HLA_A_32	logistic	1	2	30019970	0.258845	0.680186	0.0876937	0.418337	0.849591	0.579675	0.106882	0.0817351
HLA_A	3201	HLA_A_3201	logistic	1	2	30019970	0.258892	0.680182	0.0876918	0.418333	0.849731	0.579793	0.106883	0.0817355
HLA_A	68	HLA_A_68	logistic	1	2	30019970	0.478176	0.627936	0.0927074	0.143292	0.642599	0.906162	0.513601	0.247933
HLA_A	6801	HLA_A_6801	logistic	1	2	30019970	0.861905	0.315555	0.34448	0.106105	0.828729	0.520492	0.419793	0.26864
HLA_B	7	HLA_B_07	logistic	1	2	31431272	4.31e-19	0.253751	3.78e-07	1.5e-07	4.32e-07	0.00288837	0.00160775	0.0382112
HLA_B	702	HLA_B_0702	logistic	1	2	31431272	5.96e-19	0.276017	3.69e-07	1.23e-07	3.21e-07	0.00391631	0.00198636	0.0445153
HLA_B	8	HLA_B_08	logistic	1	2	31431272	0.50358	0.0171281	0.335765	0.0307045	0.225331	8.85e-05	0.0011146	0.256081
HLA_B	801	HLA_B_0801	logistic	1	2	31431272	0.503721	0.017171	0.3354	0.0307041	0.226136	8.78e-05	0.00111723	0.25577
HLA_B	13	HLA_B_13	logistic	1	2	31431272	0.00354452	0.461345	0.0027364	0.558449	0.128751	0.760868	0.296008	0.0499454
HLA_B	1302	HLA_B_1302	logistic	1	2	31431272	0.00344174	0.48058	0.00328609	0.466773	0.128976	0.80294	0.187983	0.0467289
HLA_B	14	HLA_B_14	logistic	1	2	31431272	3.24e-10	0.0325708	1.43e-06	0.00266361	0.0390594	0.0577264	0.101962	0.106012
HLA_B	1401	HLA_B_1401	logistic	1	2	31431272	1e-08	0.0631075	0.000302596	0.00369973	0.0363027	0.141754	0.58199	0.494966
HLA_B	1402	HLA_B_1402	logistic	1	2	31431272	0.000153367	0.204447	0.000780611	0.132509	0.242236	0.188972	0.538416	0.37952
HLA_B	15	HLA_B_15	logistic	1	2	31431272	0.55599	0.187694	0.541883	0.630873	0.17844	4.78e-07	0.0123228	0.239685
HLA_B	1501	HLA_B_1501	logistic	1	2	31431272	0.75336	0.0943636	0.884796	0.305752	0.558133	1.09e-07	0.0174941	0.487922
HLA_B	18	HLA_B_18	logistic	1	2	31431272	0.160646	0.267592	0.167902	0.276748	0.424089	0.99311	0.153178	0.518883
HLA_B	1801	HLA_B_1801	logistic	1	2	31431272	0.168492	0.26751	0.168429	0.314809	0.415746	0.986292	0.135769	0.521525
HLA_B	27	HLA_B_27	logistic	1	2	31431272	3.61e-32	0.842116	6.45e-13	0.00017877	0.00110107	0.959006	8.81e-98	0.00269216
HLA_B	2705	HLA_B_2705	logistic	1	2	31431272	1.93e-30	0.848626	5.86e-11	0.000151339	0.0024607	0.834661	1.62e-97	0.00303525
HLA_B	35	HLA_B_35	logistic	1	2	31431272	2.83e-07	0.771934	1.25e-12	2.68e-05	0.876583	0.798812	0.381618	0.471083
HLA_B	3501	HLA_B_3501	logistic	1	2	31431272	0.0578365	0.780183	0.0004282	0.0447242	0.332313	0.855633	0.436674	0.306585
HLA_B	3503	HLA_B_3503	logistic	1	2	31431272	5.61e-05	0.838787	1.74e-07	0.000657457	0.818519	0.364475	0.180149	0.500118
HLA_B	37	HLA_B_37	logistic	1	2	31431272	0.412945	0.0133582	0.0506593	0.174976	0.290255	0.695712	0.505311	0.876983
HLA_B	3701	HLA_B_3701	logistic	1	2	31431272	0.413662	0.0134224	0.0507642	0.175245	0.28967	0.696477	0.510084	0.876776
HLA_B	38	HLA_B_38	logistic	1	2	31431272	0.127682	0.396337	0.00853827	0.404045	0.639397	0.152283	0.119054	0.473021
HLA_B	3801	HLA_B_3801	logistic	1	2	31431272	0.166929	0.429756	0.00964096	0.556329	0.69058	0.121793	0.117165	0.444165
HLA_B	39	HLA_B_39	logistic	1	2	31431272	5.12e-40	0.358296	3.64e-28	5.2e-29	3.38e-16	0.0469012	0.908814	0.066047
HLA_B	3901	HLA_B_3901	logistic	1	2	31431272	7.97e-12	0.594485	2.26e-07	1.24e-14	0.000447114	0.0875551	0.568496	0.814824
HLA_B	3906	HLA_B_3906	logistic	1	2	31431272	2e-34	0.466279	4.59e-28	4.04e-18	4.7e-17	0.268668	0.37254	0.00966783
HLA_B	40	HLA_B_40	logistic	1	2	31431272	8.4e-08	0.40383	2.12e-07	0.000334556	5.08e-05	0.796547	0.00666034	0.552699
HLA_B	4001	HLA_B_4001	logistic	1	2	31431272	4.45e-07	0.209013	2.57e-06	0.000658206	9.41e-05	0.674252	0.0135651	0.468629
HLA_B	4002	HLA_B_4002	logistic	1	2	31431272	0.310073	0.405602	0.104446	0.371053	0.63868	0.491269	0.332575	0.754623
HLA_B	44	HLA_B_44	logistic	1	2	31431272	4.84e-06	0.345323	0.00458886	0.927792	0.000101751	0.0462949	0.070611	0.414529
HLA_B	4402	HLA_B_4402	logistic	1	2	31431272	0.112765	0.908691	0.050012	0.00500451	0.616009	0.849742	0.250324	0.995523
HLA_B	4403	HLA_B_4403	logistic	1	2	31431272	8.54e-26	0.069045	1.07e-13	4.97e-05	5.65e-10	0.000823897	0.20338	0.152352
HLA_B	49	HLA_B_49	logistic	1	2	31431272	0.239664	0.195564	0.780821	0.887125	0.244975	0.00882085	0.217586	0.636954
HLA_B	4901	HLA_B_4901	logistic	1	2	31431272	0.240669	0.195811	0.779635	0.887175	0.245788	0.00884492	0.21665	0.636739
HLA_B	51	HLA_B_51	logistic	1	2	31431272	0.0152107	0.0252283	0.684137	0.967017	2.43e-07	0.364312	0.0728594	0.0443623
HLA_B	5101	HLA_B_5101	logistic	1	2	31431272	0.0139441	0.0261148	0.692106	0.987219	1.85e-07	0.395586	0.0670154	0.0453014
HLA_B	55	HLA_B_55	logistic	1	2	31431272	0.000531655	0.417418	0.00135937	0.00227068	0.978443	0.126015	0.470877	0.682572
HLA_B	5501	HLA_B_5501	logistic	1	2	31431272	0.000536519	0.417383	0.00137589	0.00227135	0.978031	0.12607	0.471333	0.68259
HLA_B	57	HLA_B_57	logistic	1	2	31431272	3.98e-12	0.763806	4.24e-08	3.01e-05	0.000470483	0.00272092	0.175893	0.0517262
HLA_B	5701	HLA_B_5701	logistic	1	2	31431272	3.09e-13	0.727538	2.77e-09	2.58e-05	0.000456957	0.00121788	0.199956	0.0490777
HLA_C	1	HLA_C_01	logistic	1	2	31346171	7.65e-20	0.0900191	0.000194974	0.000533598	5.31e-08	0.296603	3.71e-47	0.0560601
HLA_C	102	HLA_C_0102	logistic	1	2	31346171	7.92e-20	0.0902397	0.000196914	0.000536681	5.38e-08	0.297142	3.82e-47	0.0561785
HLA_C	2	HLA_C_02	logistic	1	2	31346171	3.23e-11	0.360865	2.32e-08	0.0164432	0.0146149	0.32708	1.64e-24	0.719576
HLA_C	202	HLA_C_0202	logistic	1	2	31346171	3.23e-11	0.360874	2.32e-08	0.0164499	0.0146231	0.327059	1.64e-24	0.719555
HLA_C	3	HLA_C_03	logistic	1	2	31346171	0.0169593	0.0170099	0.173745	0.526462	0.0026967	0.00060843	0.0111426	0.717319
HLA_C	303	HLA_C_0303	logistic	1	2	31346171	0.619885	0.0864462	0.41808	0.234225	0.619924	0.0310919	0.443101	0.476482
HLA_C	304	HLA_C_0304	logistic	1	2	31346171	0.000682712	0.101678	0.0164335	0.0497063	0.00104962	0.0123011	0.01004	0.973543
HLA_C	4	HLA_C_04	logistic	1	2	31346171	0.00236304	0.68704	5.99e-08	0.00468332	0.584022	0.54358	0.22219	0.945216
HLA_C	401	HLA_C_0401	logistic	1	2	31346171	0.00246316	0.686681	5.5e-08	0.00594225	0.586507	0.548013	0.169559	0.948829
HLA_C	5	HLA_C_05	logistic	1	2	31346171	0.678929	0.942189	0.848045	0.22125	0.128152	0.272779	0.178048	0.307323
HLA_C	501	HLA_C_0501	logistic	1	2	31346171	0.657039	0.944875	0.893632	0.219969	0.128619	0.270553	0.177461	0.302147
HLA_C	6	HLA_C_06	logistic	1	2	31346171	2.16e-16	0.633942	5.24e-14	1.48e-05	0.0012837	0.000285093	0.00674856	0.0084575
HLA_C	602	HLA_C_0602	logistic	1	2	31346171	2.17e-16	0.633257	5.24e-14	1.48e-05	0.00128451	0.000285365	0.00674851	0.00845748
HLA_C	7	HLA_C_07	logistic	1	2	31346171	0.464446	0.0484614	0.462835	0.294585	0.379971	0.122101	3.5e-06	0.81965
HLA_C	701	HLA_C_0701	logistic	1	2	31346171	0.0217856	0.0240292	0.802056	0.38241	0.0125356	7.56e-06	0.000293859	0.64287
HLA_C	702	HLA_C_0702	logistic	1	2	31346171	0.00795735	0.726447	0.656355	0.130126	0.0770221	0.0637745	0.00702195	0.452421
HLA_C	704	HLA_C_0704	logistic	1	2	31346171	0.00300671	0.150877	0.00649308	0.011417	0.347032	0.0621181	0.344239	0.1461
HLA_C	8	HLA_C_08	logistic	1	2	31346171	1.7e-10	0.0160393	7.17e-07	0.00188741	0.0441124	0.061504	0.131674	0.185535
HLA_C	802	HLA_C_0802	logistic	1	2	31346171	4.41e-11	0.0222501	1.83e-07	0.00321579	0.0202758	0.0818772	0.152698	0.108924
HLA_C	12	HLA_C_12	logistic	1	2	31346171	0.717645	0.88338	0.60565	0.255956	0.746306	0.873502	0.0283808	0.692325
HLA_C	1203	HLA_C_1203	logistic	1	2	31346171	0.123796	0.820753	0.097786	0.0489663	0.620658	0.884412	0.0488566	0.871747
HLA_C	14	HLA_C_14	logistic	1	2	31346171	0.0968023	0.793756	0.385184	0.875831	0.00997191	0.923831	0.346803	0.947688
HLA_C	1402	HLA_C_1402	logistic	1	2	31346171	0.0965801	0.793373	0.384643	0.875329	0.0099671	0.923475	0.346949	0.947536
HLA_C	15	HLA_C_15	logistic	1	2	31346171	0.695339	0.184182	0.228786	0.478053	0.223944	0.635813	0.558749	0.236781
HLA_C	1502	HLA_C_1502	logistic	1	2	31346171	0.874936	0.334699	0.345107	0.395982	0.174484	0.453576	0.808622	0.317814
HLA_C	16	HLA_C_16	logistic	1	2	31346171	2.63e-17	0.167333	2.87e-10	0.0625686	4.54e-08	0.0156727	0.605471	0.0430138
HLA_C	1601	HLA_C_1601	logistic	1	2	31346171	1.02e-19	0.254861	4.96e-12	0.00373353	1.15e-07	0.00816752	0.577398	0.0558393
HLA_DPA1	1	HLA_DPA1_01	logistic	1	2	33145064	9.11e-12	0.16446	2.31e-06	0.00478616	0.00411951	2.37e-05	0.0909962	0.287855
HLA_DPA1	103	HLA_DPA1_0103	logistic	1	2	33145064	2.09e-11	0.29976	6.92e-07	0.00541033	0.00629801	5.13e-05	0.184952	0.201788
HLA_DPA1	2	HLA_DPA1_02	logistic	1	2	33145064	8.4e-12	0.180103	3.54e-06	0.00590394	0.0030631	2.17e-05	0.0831722	0.225413
HLA_DPA1	201	HLA_DPA1_0201	logistic	1	2	33145064	3.35e-07	0.179502	4.22e-05	0.0532992	0.158778	0.0012862	0.197612	0.347916
HLA_DPA1	202	HLA_DPA1_0202	logistic	1	2	33145064	2.93e-06	0.812617	0.0607536	0.0333785	0.000292322	0.00611374	0.239185	0.450291
HLA_DPB1	1	HLA_DPB1_01	logistic	1	2	33157346	2.41e-12	0.629521	8.44e-05	0.00110307	2.88e-07	0.0622334	0.00118167	0.286043
HLA_DPB1	101	HLA_DPB1_0101	logistic	1	2	33157346	2.4e-12	0.629438	8.44e-05	0.00110196	2.89e-07	0.062227	0.00117711	0.284996
HLA_DPB1	2	HLA_DPB1_02	logistic	1	2	33157346	9.99e-68	0.905631	8.17e-68	1.82e-35	2.6e-12	0.00184678	0.830799	0.101171
HLA_DPB1	201	HLA_DPB1_0201	logistic	1	2	33157346	3.39e-71	0.520826	1.01e-69	1.23e-39	3.61e-13	0.0007359	0.843219	0.0787167
HLA_DPB1	3	HLA_DPB1_03	logistic	1	2	33157346	0.843948	0.00146757	5.55e-06	0.0818891	3.45e-06	0.0842615	0.693113	0.886166
HLA_DPB1	301	HLA_DPB1_0301	logistic	1	2	33157346	0.842307	0.00146954	5.54e-06	0.0818852	3.51e-06	0.0842582	0.693235	0.886179
HLA_DPB1	4	HLA_DPB1_04	logistic	1	2	33157346	2.47e-08	0.247931	8.48e-05	2.86e-06	3.14e-07	0.0347594	0.0266162	0.696748
HLA_DPB1	401	HLA_DPB1_0401	logistic	1	2	33157346	2.47e-09	0.334086	5.3e-05	8.49e-05	1.37e-07	0.655608	0.149047	0.687487
HLA_DPB1	402	HLA_DPB1_0402	logistic	1	2	33157346	0.591023	0.80421	0.906028	0.223059	0.87598	9.23e-05	0.2201	0.216549
HLA_DPB1	5	HLA_DPB1_05	logistic	1	2	33157346	3.26e-06	0.784463	0.0202706	0.0151278	0.00139014	0.0114949	0.602284	0.583612
HLA_DPB1	501	HLA_DPB1_0501	logistic	1	2	33157346	3.26e-06	0.78438	0.0202842	0.0151331	0.00138565	0.0114972	0.602341	0.583651
HLA_DPB1	10	HLA_DPB1_10	logistic	1	2	33157346	1.95e-05	0.192513	0.22596	0.00795206	1.73e-07	0.128067	0.0326044	0.736262
HLA_DPB1	1001	HLA_DPB1_1001	logistic	1	2	33157346	1.94e-05	0.192499	0.225927	0.00795085	1.73e-07	0.128076	0.032602	0.736282
HLA_DPB1	11	HLA_DPB1_11	logistic	1	2	33157346	0.000791456	0.16592	0.0298945	0.763186	0.00651173	0.0139234	0.0160303	0.355844
HLA_DPB1	1101	HLA_DPB1_1101	logistic	1	2	33157346	0.000791496	0.165922	0.0298951	0.763191	0.00651187	0.0139235	0.0160301	0.355844
HLA_DPB1	13	HLA_DPB1_13	logistic	1	2	33157346	0.0179307	0.520703	0.00344553	0.910352	0.823669	0.155405	0.0738687	0.176771
HLA_DPB1	1301	HLA_DPB1_1301	logistic	1	2	33157346	0.0208419	0.519568	0.00469461	0.910509	0.82432	0.155629	0.0738698	0.176917
HLA_DPB1	17	HLA_DPB1_17	logistic	1	2	33157346	0.00119431	0.40861	0.000802236	0.0516199	0.697813	0.62505	0.224447	0.340348
HLA_DPB1	1701	HLA_DPB1_1701	logistic	1	2	33157346	0.00119882	0.411183	0.000802212	0.051617	0.697833	0.625206	0.224383	0.340291
HLA_DQA1	1	HLA_DQA1_01	logistic	1	2	32716284	0.18449	0.00773744	0.422554	0.266869	0.46031	3.87e-07	0.712136	0.870542
HLA_DQA1	101	HLA_DQA1_0101	logistic	1	2	32716284	8.56e-05	0.0362834	0.518419	0.0611697	1.58e-06	0.299035	0.00167182	0.0698004
HLA_DQA1	102	HLA_DQA1_0102	logistic	1	2	32716284	6.95e-24	0.425945	4.13e-10	2.37e-07	8.22e-09	2.54e-07	0.0650215	0.067285
HLA_DQA1	103	HLA_DQA1_0103	logistic	1	2	32716284	1.07e-13	0.299218	1.16e-13	2.91e-14	0.000263545	0.00137874	0.401445	0.479937
HLA_DQA1	2	HLA_DQA1_02	logistic	1	2	32716284	3.13e-78	0.00164539	4.79e-47	4.48e-17	2.22e-21	6.22e-09	0.0161244	0.402404
HLA_DQA1	201	HLA_DQA1_0201	logistic	1	2	32716284	2.88e-78	0.00163783	4.6e-47	4.41e-17	2.17e-21	6.18e-09	0.0160835	0.401977
HLA_DQA1	3	HLA_DQA1_03	logistic	1	2	32716284	4.8e-46	0.182809	1.21e-50	1.25e-21	3.44e-20	2.2e-26	0.411767	0.218235
HLA_DQA1	301	HLA_DQA1_0301	logistic	1	2	32716284	4.66e-46	0.182857	1.16e-50	1.24e-21	3.43e-20	2.19e-26	0.411185	0.218074
HLA_DQA1	4	HLA_DQA1_04	logistic	1	2	32716284	6.27e-198	0.0591787	9.4e-182	2.17e-90	1.25e-72	0.0343794	3.51e-08	0.000142839
HLA_DQA1	401	HLA_DQA1_0401	logistic	1	2	32716284	6.26e-198	0.0591713	9.39e-182	2.17e-90	1.25e-72	0.0343719	3.51e-08	0.000142824
HLA_DQA1	5	HLA_DQA1_05	logistic	1	2	32716284	2.86e-38	5.87e-09	2.55e-33	1.05e-07	3.07e-13	0.635172	0.975776	0.828595
HLA_DQA1	501	HLA_DQA1_0501	logistic	1	2	32716284	2.94e-38	5.91e-09	2.57e-33	1.05e-07	3.12e-13	0.634003	0.975386	0.828295
HLA_DQB1	2	HLA_DQB1_02	logistic	1	2	32739039	1.8e-39	0.30649	5.8e-22	1.06e-11	8.04e-13	0.000171268	0.000212528	0.235393
HLA_DQB1	201	HLA_DQB1_0201	logistic	1	2	32739039	0.00355383	0.234255	0.33244	0.00781688	0.0842102	0.377963	0.00059917	0.414562
HLA_DQB1	202	HLA_DQB1_0202	logistic	1	2	32739039	3.75e-53	0.00643392	2.04e-33	7.45e-11	8.28e-16	3.34e-05	0.157236	0.44498
HLA_DQB1	3	HLA_DQB1_03	logistic	1	2	32739039	0.280173	0.00202375	0.000486521	0.000686263	0.152476	3.23e-15	0.326811	0.789053
HLA_DQB1	301	HLA_DQB1_0301	logistic	1	2	32739039	1.46e-26	3.24e-06	8.95e-16	0.00088078	1.98e-08	2.71e-06	0.0107073	0.674246
HLA_DQB1	302	HLA_DQB1_0302	logistic	1	2	32739039	1.43e-26	0.714626	5.01e-30	2.01e-11	2.25e-13	1.91e-16	0.5866	0.210632
HLA_DQB1	303	HLA_DQB1_0303	logistic	1	2	32739039	2.86e-12	0.258261	2.91e-08	0.000484421	0.00544232	0.0011511	0.106886	0.603762
HLA_DQB1	4	HLA_DQB1_04	logistic	1	2	32739039	4.21e-188	0.118376	3.49e-172	1.52e-85	4.65e-68	0.0537529	1.18e-07	0.000906254
HLA_DQB1	402	HLA_DQB1_0402	logistic	1	2	32739039	5.75e-189	0.105114	2.69e-173	4.13e-86	2.43e-68	0.0431094	7.32e-08	0.000787571
HLA_DQB1	5	HLA_DQB1_05	logistic	1	2	32739039	7.38e-08	0.0628706	0.111485	0.0207663	9.35e-10	0.177628	0.000718521	0.0344902
HLA_DQB1	501	HLA_DQB1_0501	logistic	1	2	32739039	0.000357394	0.0166567	0.185885	0.0116745	0.0039212	0.179235	0.000193312	0.320793
HLA_DQB1	502	HLA_DQB1_0502	logistic	1	2	32739039	5.93e-08	0.646984	0.000172347	0.0478869	5.45e-07	0.43545	0.230163	0.208351
HLA_DQB1	503	HLA_DQB1_0503	logistic	1	2	32739039	0.227955	0.809597	0.221801	0.130501	8.93e-06	0.698104	0.356515	0.0309836
HLA_DQB1	6	HLA_DQB1_06	logistic	1	2	32739039	4.97e-10	0.135989	0.0238374	0.441188	7.03e-06	1.35e-11	0.01324	0.109528
HLA_DQB1	602	HLA_DQB1_0602	logistic	1	2	32739039	2.36e-32	0.154836	3.95e-16	4.55e-08	9.36e-12	2.87e-05	0.0426324	0.0148777
HLA_DQB1	603	HLA_DQB1_0603	logistic	1	2	32739039	3.06e-17	0.515417	3.17e-16	3.59e-16	1.45e-05	0.000556352	0.337011	0.132003
HLA_DQB1	604	HLA_DQB1_0604	logistic	1	2	32739039	0.579497	0.312648	0.169693	0.708918	0.0869795	0.0114378	0.442114	0.818863
HLA_DQB1	609	HLA_DQB1_0609	logistic	1	2	32739039	3e-06	0.207029	0.00323298	0.00507744	0.0380124	0.153941	0.915869	0.265836
HLA_DRB1	1	HLA_DRB1_01	logistic	1	2	32660042	3.21e-06	0.0280495	0.0393492	0.000828267	0.00133711	0.187347	2.15e-07	0.166351
HLA_DRB1	101	HLA_DRB1_0101	logistic	1	2	32660042	4.32e-12	0.356296	0.00011793	3.33e-05	1.32e-05	0.00850385	4.26e-06	0.0410304
HLA_DRB1	102	HLA_DRB1_0102	logistic	1	2	32660042	0.0395632	0.0527821	0.00202541	0.638247	0.283753	0.190986	0.864009	0.925601
HLA_DRB1	103	HLA_DRB1_0103	logistic	1	2	32660042	0.0165539	0.0602744	0.547948	0.646814	0.00403312	0.120516	0.00413648	0.277208
HLA_DRB1	3	HLA_DRB1_03	logistic	1	2	32660042	0.00520456	0.23093	0.472178	0.00661012	0.116178	0.205456	0.000773908	0.318202
HLA_DRB1	301	HLA_DRB1_0301	logistic	1	2	32660042	0.00503474	0.271181	0.487124	0.0068885	0.110607	0.211646	0.000793075	0.320594
HLA_DRB1	4	HLA_DRB1_04	logistic	1	2	32660042	9.77e-54	0.181591	4.26e-55	4.35e-24	1.68e-24	3.95e-27	0.369853	0.0902714
HLA_DRB1	401	HLA_DRB1_0401	logistic	1	2	32660042	7.24e-26	0.290401	6.89e-31	1.26e-13	5.92e-13	1.19e-23	0.95866	0.456356
HLA_DRB1	404	HLA_DRB1_0404	logistic	1	2	32660042	1.82e-22	0.582416	3.11e-19	2.74e-07	2.4e-10	0.000250431	0.538093	0.194516
HLA_DRB1	407	HLA_DRB1_0407	logistic	1	2	32660042	6.13e-07	0.273792	1.23e-05	0.004291	0.144942	0.564538	0.747068	0.373415
HLA_DRB1	7	HLA_DRB1_07	logistic	1	2	32660042	2.46e-78	0.00153694	6.8e-47	6.6e-17	1.55e-21	5.05e-09	0.0150027	0.392743
HLA_DRB1	701	HLA_DRB1_0701	logistic	1	2	32660042	2.48e-78	0.00153737	6.81e-47	6.61e-17	1.56e-21	5.06e-09	0.0150111	0.392774
HLA_DRB1	8	HLA_DRB1_08	logistic	1	2	32660042	9.31e-199	0.0151643	6.53e-178	3.02e-91	2.66e-72	0.0414344	8e-08	0.000309938
HLA_DRB1	801	HLA_DRB1_0801	logistic	1	2	32660042	9.07e-188	0.413721	1.36e-170	1.02e-89	3.69e-72	0.027697	9.74e-09	0.000979386
HLA_DRB1	9	HLA_DRB1_09	logistic	1	2	32660042	0.00854944	0.63282	0.182063	0.0902261	0.00953523	0.63937	0.732667	0.0991726
HLA_DRB1	901	HLA_DRB1_0901	logistic	1	2	32660042	0.00854944	0.63282	0.182063	0.0902261	0.00953523	0.63937	0.732667	0.0991726
HLA_DRB1	11	HLA_DRB1_11	logistic	1	2	32660042	2.1e-96	3.41e-11	2.03e-68	3.01e-26	1.01e-36	0.509392	0.000510565	0.0695547
HLA_DRB1	12	HLA_DRB1_12	logistic	1	2	32660042	0.0536006	0.286483	0.0227121	0.165015	0.827596	0.681269	0.171773	0.768234
HLA_DRB1	1201	HLA_DRB1_1201	logistic	1	2	32660042	0.0510186	0.27237	0.0205018	0.224655	0.868953	0.705504	0.163761	0.758541
HLA_DRB1	13	HLA_DRB1_13	logistic	1	2	32660042	2e-08	0.977117	2.94e-12	1.26e-07	0.0125609	5.19e-06	0.159398	0.791419
HLA_DRB1	1301	HLA_DRB1_1301	logistic	1	2	32660042	4.2e-20	0.735844	2.91e-18	3.83e-17	3.85e-07	0.00114339	0.473546	0.37272
HLA_DRB1	1302	HLA_DRB1_1302	logistic	1	2	32660042	0.00387683	0.810594	0.857266	0.0797408	0.00651103	0.000975827	0.511037	0.508593
HLA_DRB1	14	HLA_DRB1_14	logistic	1	2	32660042	0.111052	0.655725	0.469457	0.278292	7.96e-06	0.767674	0.281269	0.0747243
HLA_DRB1	15	HLA_DRB1_15	logistic	1	2	32660042	2.04e-37	0.161185	2.75e-18	1.58e-09	8.78e-14	1.99e-05	0.0292223	0.0168925
HLA_DRB1	1501	HLA_DRB1_1501	logistic	1	2	32660042	5.7e-34	0.26363	9.65e-17	1.53e-08	1.06e-12	8.5e-06	0.0398966	0.0245013
HLA_DRB1	16	HLA_DRB1_16	logistic	1	2	32660042	5.44e-07	0.495252	0.00360398	0.107995	2.58e-07	0.914887	0.550689	0.195557
HLA_DRB1	1601	HLA_DRB1_1601	logistic	1	2	32660042	4.76e-07	0.668879	0.00143333	0.05271	3.3e-07	0.767938	0.305044	0.370216
imm_6_30184807	30184807	imm_6_30184807	logistic	1	2	30184807	0.00222915	0.0818951	0.0205729	0.416104	0.0910721	0.898574	0.00886974	0.799307
imm_6_31976744	31976744	imm_6_31976744	logistic	1	2	31976744	0.0310315	0.964391	0.0046456	0.0954345	0.170231	0.00012318	0.0592197	0.720279
INS_DQB1_226x227_32736002_PQGPPPAG	32736002	INS_DQB1_226x227_32736002_PQGPPPAG	logistic	1	2	32736002	0.528691	0.853197	0.0186119	0.0217831	0.00274306	0.570757	0.370225	0.123169
rs1003581	29648183	rs1003581	logistic	1	2	29648183	4.93e-10	0.827344	3.42e-06	0.00283252	0.000339848	0.0756736	0.00666787	0.828994
rs1003582	29646382	rs1003582	logistic	1	2	29646382	0.542423	0.263596	0.611989	0.174756	0.709513	0.146727	0.0494583	0.571329
rs1003878	32407800	rs1003878	logistic	1	2	32407800	3.86e-05	0.947469	0.0245117	0.000620642	0.439801	0.000742136	0.00010479	0.926779
rs1003879	32407570	rs1003879	logistic	1	2	32407570	0.00424771	0.088508	0.00178101	0.660512	0.000265808	0.000205888	0.00190704	0.553278
rs10046257	32962675	rs10046257	logistic	1	2	32962675	2.39e-08	0.990102	3.81e-06	0.00213407	0.000796803	0.178269	0.661074	0.627066
rs10080898	32977860	rs10080898	logistic	1	2	32977860	4.13e-13	0.501201	9.02e-11	0.000330582	0.000204223	0.113282	0.359277	0.231928
rs1008403	30240806	rs1008403	logistic	1	2	30240806	0.00732633	0.232564	0.0763899	0.299296	0.00578629	0.576796	0.29842	0.542985
rs1012411	30440534	rs1012411	logistic	1	2	30440534	0.0160515	0.0561357	0.061635	0.951623	0.140238	0.25027	0.337935	0.808244
rs1013518	30307491	rs1013518	logistic	1	2	30307491	6.63e-06	0.708387	0.000478908	0.0015714	0.33165	0.000223573	0.3025	0.129701
rs1015465	30194319	rs1015465	logistic	1	2	30194319	6.05e-20	0.736944	2.98e-12	4.38e-06	1.86e-06	0.0257982	0.000450742	0.757481
rs1015466	30193895	rs1015466	logistic	1	2	30193895	0.0305926	0.179022	0.0143143	2.66e-05	0.381717	0.00317817	0.469413	0.957803
rs1018430	32389666	rs1018430	logistic	1	2	32389666	6.32e-28	0.340305	2.54e-30	4.65e-12	2.29e-09	0.00615187	0.461854	0.24928
rs1018433	32389488	rs1018433	logistic	1	2	32389488	3.87e-33	0.245188	5.04e-34	6.19e-14	8.19e-11	0.0236298	0.506821	0.169891
rs1018434	32389338	rs1018434	logistic	1	2	32389338	9.08e-33	0.203702	3.36e-33	1.33e-13	1.43e-10	0.0414689	0.471408	0.131935
rs1018846	30245628	rs1018846	logistic	1	2	30245628	1.53e-08	0.123273	9.76e-10	0.00328717	0.0945344	0.0958112	0.995883	0.472448
rs10214759	32965273	rs10214759	logistic	1	2	32965273	0.00194937	0.153999	0.000475361	0.189059	0.605835	0.451333	0.292117	0.427418
rs10214886	32965397	rs10214886	logistic	1	2	32965397	7.49e-07	0.94973	8.21e-05	0.00787621	0.00273763	0.0826526	0.769752	0.662661
rs10223421	31498034	rs10223421	logistic	1	2	31498034	4.67e-24	0.473586	5.97e-16	6.63e-07	0.00041221	0.215218	3.91e-33	0.0189122
rs10223710	32326659	rs10223710	logistic	1	2	32326659	1.53e-05	0.401403	5.3e-07	0.145218	0.200037	0.355932	0.701189	0.64621
rs1023448	32836169	rs1023448	logistic	1	2	32836169	4.95e-37	0.912247	7.38e-21	2.98e-11	5.33e-18	0.139358	0.00139367	0.00556713
rs1023449	32835883	rs1023449	logistic	1	2	32835883	3.92e-37	0.912247	7.38e-21	2.06e-11	5.33e-18	0.139358	0.00139367	0.00556713
rs1029237	30246641	rs1029237	logistic	1	2	30246641	1.73e-23	0.257253	1.08e-17	7.27e-14	0.000202765	0.0110956	2.45e-05	0.362786
rs1029238	30246624	rs1029238	logistic	1	2	30246624	0.00119177	0.915901	0.00237776	0.0770407	0.607195	0.00130085	0.982786	0.314945
rs1029239	30246141	rs1029239	logistic	1	2	30246141	1.03e-06	0.281632	1.32e-06	7.64e-05	0.206092	0.914553	0.00244079	0.536952
rs1029295	32964460	rs1029295	logistic	1	2	32964460	7.51e-07	0.971276	8.37e-05	0.0118427	0.00229935	0.0777395	0.776953	0.651967
rs1033499	32415510	rs1033499	logistic	1	2	32415510	0.00160051	0.768023	0.101327	0.0310119	0.490697	0.00139498	0.00179766	0.788628
rs1033500	32415360	rs1033500	logistic	1	2	32415360	0.00519068	0.265707	0.927262	0.805055	0.668231	1.35e-10	0.00015698	0.509552
rs1034322	30476833	rs1034322	logistic	1	2	30476833	2.9e-18	0.715977	1.06e-13	3.14e-06	2.53e-06	0.2428	2.85e-06	0.961398
rs1034324	30476591	rs1034324	logistic	1	2	30476591	1.54e-23	0.944663	6.88e-17	4.17e-07	1.94e-09	0.3017	1.3e-05	0.652924
rs1035798	32259200	rs1035798	logistic	1	2	32259200	1.17e-128	0.00386023	1.87e-86	6.09e-46	2.28e-45	0.000566361	7.74e-06	0.0258635
rs1041885	32520787	rs1041885	logistic	1	2	32520787	0.00173727	0.0905636	3.66e-06	0.0706881	0.139699	0.00159686	0.00803759	0.820838
rs1041981	31648763	rs1041981	logistic	1	2	31648763	4.72e-17	0.104014	1.03e-09	1.67e-05	0.00254136	0.0279627	6.13e-09	0.135292
rs1042126	31192267	rs1042126	logistic	1	2	31192267	0.109244	0.945796	0.634086	0.585899	0.047469	0.0207556	2.7e-11	0.0975885
rs1042127	31192149	rs1042127	logistic	1	2	31192149	1.49e-13	0.219078	1.15e-07	0.000731713	9.39e-05	0.960216	3.36e-13	0.449151
rs1042134	31191643	rs1042134	logistic	1	2	31191643	0.109244	0.945796	0.634086	0.585899	0.047469	0.0207556	2.7e-11	0.0975885
rs1042141	31191445	rs1042141	logistic	1	2	31191445	0.113202	0.951729	0.620745	0.581212	0.0505478	0.0210469	2.62e-11	0.096626
rs1042145	31191307	rs1042145	logistic	1	2	31191307	0.110718	0.944115	0.630912	0.587647	0.0479095	0.0206193	2.72e-11	0.0978112
rs1042147	31191135	rs1042147	logistic	1	2	31191135	0.109475	0.945499	0.633515	0.586034	0.0475394	0.0207096	2.7e-11	0.0976269
rs1042337	33012958	rs1042337	logistic	1	2	33012958	1.55e-09	0.0719801	2.33e-05	0.000293005	0.000169869	0.889219	0.867042	0.0765203
rs1042338	30260768	rs1042338	logistic	1	2	30260768	6.53e-23	0.385252	2.49e-16	2.17e-13	0.000181302	0.00796514	6.89e-06	0.335902
rs1042544	33162435	rs1042544	logistic	1	2	33162435	9.52e-12	0.0730369	2.73e-17	8.43e-05	0.803159	3.77e-06	0.0610787	0.551398
rs1043483	31001707	rs1043483	logistic	1	2	31001707	2.79e-11	0.12554	2.38e-06	0.0330525	0.000734737	0.023615	0.0019447	0.0177755
rs1043618	31891486	rs1043618	logistic	1	2	31891486	0.223559	0.461597	0.221962	0.204482	0.482304	0.335114	0.134796	0.0251024
rs1044043	32901959	rs1044043	logistic	1	2	32901959	1.74e-32	0.760539	2.01e-19	3.49e-09	4.66e-16	0.281441	0.0221761	0.00318512
rs1044429	33080620	rs1044429	logistic	1	2	33080620	9.75e-11	0.973756	5.68e-06	5.5e-07	8.63e-07	0.748664	0.890216	0.969469
rs1044506	32280043	rs1044506	logistic	1	2	32280043	9.04e-25	0.162426	2.6e-12	2.46e-07	4.71e-08	0.000708038	0.0252011	0.00674186
rs1045251	30367636	rs1045251	logistic	1	2	30367636	0.00890076	0.431896	0.102978	0.113888	0.0217118	0.329956	0.286686	0.230165
rs10456057	31353513	rs10456057	logistic	1	2	31353513	8.51e-10	0.897789	2.66e-08	0.014996	0.0142574	0.000856105	0.000579834	0.0255858
rs10456378	30314165	rs10456378	logistic	1	2	30314165	8.83e-14	0.59428	4.37e-14	2.04e-06	0.00139951	0.282794	0.860221	0.837928
rs10456384	30541069	rs10456384	logistic	1	2	30541069	5.13e-21	0.809846	1.16e-13	3.1e-13	3.63e-06	0.923206	2.18e-06	0.0541259
rs10456396	31612525	rs10456396	logistic	1	2	31612525	0.000212387	0.202643	0.000101883	0.18831	0.0460442	0.358203	0.955118	0.410169
rs10456397	31911993	rs10456397	logistic	1	2	31911993	3.15e-05	0.0736211	3.78e-05	0.1608	0.0198788	0.236895	0.324319	0.14029
rs1046080	31703861	rs1046080	logistic	1	2	31703861	2.97e-27	0.0408448	9.15e-14	6.69e-06	5.01e-09	1.15e-06	0.0148332	0.120913
rs1046089	31710946	rs1046089	logistic	1	2	31710946	0.00020394	0.857426	0.00020316	0.0390097	0.749192	0.0218904	0.724148	0.0279674
rs1048087	32717264	rs1048087	logistic	1	2	32717264	2.82e-36	0.074809	1.38e-32	1.94e-20	1.69e-14	1.55e-05	0.0233428	0.170277
rs1048412	30140474	rs1048412	logistic	1	2	30140474	3.43e-06	0.458818	4.22e-07	0.0278503	0.0281972	0.619846	0.210525	0.110751
rs10484549	30134269	rs10484549	logistic	1	2	30134269	5.03e-07	0.0708214	9.94e-06	0.0148285	0.0936672	0.326037	0.863627	0.60633
rs10484551	30364817	rs10484551	logistic	1	2	30364817	0.401273	0.944978	0.412356	0.223741	0.143327	0.882594	0.578359	0.289493
rs10484552	30592015	rs10484552	logistic	1	2	30592015	4.55e-06	0.904996	4.36e-05	0.0147523	0.0977269	0.0216454	0.131276	0.124052
rs10484554	31382534	rs10484554	logistic	1	2	31382534	6.45e-10	0.813562	1.21e-08	0.0120122	0.0164976	0.000858639	0.000579477	0.0256799
rs10484558	31723493	rs10484558	logistic	1	2	31723493	0.086444	0.208718	0.116122	0.481111	0.856908	0.301175	0.520575	0.131427
rs10484563	32811140	rs10484563	logistic	1	2	32811140	0.156651	0.00279565	0.698395	0.0629392	0.100921	0.320682	0.000426741	0.652532
rs10484565	32903010	rs10484565	logistic	1	2	32903010	0.233766	0.42446	0.223808	0.00486831	0.452498	0.00359059	0.838633	0.699803
rs10484566	32943236	rs10484566	logistic	1	2	32943236	0.104022	0.528741	0.294043	0.38202	0.996367	0.0404176	0.773429	0.164757
rs10484567	33020530	rs10484567	logistic	1	2	33020530	0.00148307	0.803204	0.00135025	0.287281	0.47644	0.906739	0.092841	0.209501
rs10484568	33043729	rs10484568	logistic	1	2	33043729	0.00229813	0.923773	6.01e-06	0.0428743	0.842395	0.866181	0.394396	0.527408
rs1048664	30370491	rs1048664	logistic	1	2	30370491	1.18e-10	0.223468	8.66e-06	0.0381521	0.000238628	0.0898488	0.0119927	0.084295
rs1048709	32022914	rs1048709	logistic	1	2	32022914	0.000254538	0.00166181	0.103093	0.141189	0.00771646	0.0102984	0.00809428	0.454792
rs1049526	33056782	rs1049526	logistic	1	2	33056782	1.15e-08	0.204066	0.000258294	0.0349177	0.00100167	0.00163141	0.811831	0.0671988
rs1049853	31344879	rs1049853	logistic	1	2	31344879	9.61e-05	0.148254	0.00986851	0.482673	0.0113989	0.845386	0.0465973	0.107481
rs1050391	33025835	rs1050391	logistic	1	2	33025835	0.0927743	0.335012	0.0583882	0.891144	0.981631	0.150555	0.490783	0.257051
rs1051133	30145887	rs1051133	logistic	1	2	30145887	0.00124793	0.689327	0.00051618	0.24538	0.425998	0.25548	0.300869	0.209203
rs1051336	32520570	rs1051336	logistic	1	2	32520570	0.00177831	0.0909734	3.74e-06	0.0711212	0.140833	0.00158733	0.00800955	0.820039
rs1051794	31487088	rs1051794	logistic	1	2	31487088	4.58e-17	0.925809	5.58e-11	3.3e-05	0.00242512	0.0901055	1.08e-30	0.0528427
rs1052248	31664560	rs1052248	logistic	1	2	31664560	0.255073	0.0907994	0.151557	0.0254856	0.145487	0.716841	0.00260937	0.455215
rs1052486	31718665	rs1052486	logistic	1	2	31718665	0.0012205	0.14266	0.389347	0.052022	0.00100036	0.87324	0.0145076	0.475257
rs1052989	31254382	rs1052989	logistic	1	2	31254382	0.30024	0.224024	0.833793	0.186257	0.0252455	0.188365	0.0628721	0.3576
rs1053924	32228693	rs1053924	logistic	1	2	32228693	2.42e-16	0.0116944	7.3e-11	4.88e-05	1.59e-06	0.0508664	0.0515143	0.0394609
rs1055384	31609537	rs1055384	logistic	1	2	31609537	0.000113182	0.0592157	0.010521	0.0536346	0.0044658	0.180922	0.00514889	0.468744
rs1055388	31609716	rs1055388	logistic	1	2	31609716	4.2e-05	0.218475	0.0303062	0.0214137	0.129455	0.817313	2.19e-05	0.105825
rs1055569	31548061	rs1055569	logistic	1	2	31548061	0.489045	0.694639	0.0466802	0.0208546	0.908461	0.0567209	0.000765033	0.28015
rs1057141	32926751	rs1057141	logistic	1	2	32926751	1.72e-22	0.250103	1.79e-21	2.97e-07	9.97e-06	0.351	0.492208	0.18675
rs1057149	32922919	rs1057149	logistic	1	2	32922919	0.0149316	0.243881	0.000821216	0.290408	0.94687	0.304606	0.246846	0.669888
rs1057373	32921257	rs1057373	logistic	1	2	32921257	9.35e-18	0.00663709	1.42e-18	4.57e-06	4.65e-05	0.267487	0.267661	0.48353
rs1058318	30620142	rs1058318	logistic	1	2	30620142	0.224321	0.314473	0.988332	0.647415	0.168837	0.214841	0.0331006	0.0581764
rs1059510	30565711	rs1059510	logistic	1	2	30565711	0.572856	0.442206	0.267	0.504066	0.977863	0.443479	0.0582253	0.0715054
rs1059612	30816934	rs1059612	logistic	1	2	30816934	0.167572	0.152041	0.0716786	0.00418158	0.813565	0.0146934	0.00182382	0.208588
rs1059615	32657541	rs1059615	logistic	1	2	32657541	0.00563978	0.275916	0.487527	0.0078681	0.124484	0.205122	0.000757502	0.312914
rs1061535	30045903	rs1061535	logistic	1	2	30045903	9.51e-19	0.0602945	4.35e-14	5.66e-05	0.000100802	0.00444276	0.0412216	0.257525
rs1061808	32244525	rs1061808	logistic	1	2	32244525	1.29e-15	0.0445074	4.34e-10	5.36e-06	2.06e-06	0.209853	0.660883	0.26374
rs1062470	31192414	rs1062470	logistic	1	2	31192414	1.47e-05	0.29256	1.74e-06	0.0332286	0.292291	0.0169632	0.24674	0.250969
rs106287	32043729	rs106287	logistic	1	2	32043729	5.8e-21	0.281347	6.21e-12	0.00164347	4.03e-08	0.000568879	0.803824	0.0429941
rs1063280	30248321	rs1063280	logistic	1	2	30248321	9.56e-13	0.251964	6.7e-09	1.03e-05	0.000251847	0.22091	0.481837	0.367759
rs1063478	33025521	rs1063478	logistic	1	2	33025521	0.529939	0.492768	0.10407	0.210465	0.686374	0.268256	0.542672	0.453194
rs1063632	31486489	rs1063632	logistic	1	2	31486489	0.149646	0.418692	0.292131	0.916066	0.0441754	0.341661	0.12511	0.596655
rs1063646	31215627	rs1063646	logistic	1	2	31215627	0.593583	0.128792	0.334737	0.608985	0.625529	0.19113	0.0302729	0.450652
rs1064190	31183094	rs1064190	logistic	1	2	31183094	1.1e-11	0.136744	2.94e-08	0.000139452	0.0119282	0.00677013	0.0971484	0.886231
rs1064191	31183354	rs1064191	logistic	1	2	31183354	9.7e-12	0.135241	2.75e-08	0.000135104	0.0115551	0.00666546	0.09637	0.888691
rs1064627	30806520	rs1064627	logistic	1	2	30806520	0.0117257	0.158801	0.0174929	3.89e-05	0.740164	0.479577	0.0019787	0.118175
rs1065356	31794987	rs1065356	logistic	1	2	31794987	2.98e-16	0.313026	2.44e-13	1.21e-06	0.000648519	0.659405	0.00132958	0.0042142
rs1065461	31238481	rs1065461	logistic	1	2	31238481	0.894872	0.771853	0.331184	0.158944	0.898143	0.0881487	0.135333	0.86925
rs10745	30138036	rs10745	logistic	1	2	30138036	0.0216168	0.941575	0.0190017	0.419225	0.526503	0.246864	0.332372	0.377002
rs10751	33010561	rs10751	logistic	1	2	33010561	0.00377547	0.734423	0.0122967	0.685842	0.0680087	0.189978	0.669738	0.978975
rs1075496	30766218	rs1075496	logistic	1	2	30766218	0.0698389	0.315584	0.216998	0.00925274	0.997301	0.208997	0.0217819	0.259693
rs1076229	30206588	rs1076229	logistic	1	2	30206588	2.91e-24	0.428458	2.29e-18	6.74e-14	0.000262002	0.0109299	2.65e-05	0.251453
rs1076829	30735195	rs1076829	logistic	1	2	30735195	0.0132921	0.27646	0.0424409	0.0153963	0.562659	0.163008	0.03534	0.261266
rs1076832	30527810	rs1076832	logistic	1	2	30527810	6.57e-17	0.674145	4.79e-12	8.94e-06	2.95e-06	0.256834	1.51e-06	0.960586
rs1077393	31718508	rs1077393	logistic	1	2	31718508	0.00121717	0.144499	0.378021	0.0530125	0.00104725	0.868278	0.0146556	0.474454
rs1077394	31718363	rs1077394	logistic	1	2	31718363	0.0208315	0.0124028	0.439437	0.779617	0.0228765	0.772957	0.983015	0.385016
rs1078792	30527599	rs1078792	logistic	1	2	30527599	1.81e-28	0.0818539	1.63e-16	9.36e-08	3.55e-08	0.000126794	0.00104664	0.289263
rs1079541	30514735	rs1079541	logistic	1	2	30514735	0.0251292	0.81162	0.000326734	0.728524	0.0241106	0.0315082	0.588496	0.630748
rs1079991	30485839	rs1079991	logistic	1	2	30485839	0.160736	0.430643	0.0381587	0.386251	0.905479	0.0424052	0.0495326	0.681245
rs10807077	31109446	rs10807077	logistic	1	2	31109446	1.17e-17	0.197154	6.93e-13	8.66e-10	0.000165179	0.533149	1.44e-14	0.582218
rs10807100	32411046	rs10807100	logistic	1	2	32411046	0.00519068	0.265707	0.927262	0.805055	0.668231	1.35e-10	0.00015698	0.509552
rs10807113	32830164	rs10807113	logistic	1	2	32830164	5.14e-74	0.277291	9.62e-45	5.59e-21	2e-31	0.0289123	0.00177292	0.000158657
rs10885	31712570	rs10885	logistic	1	2	31712570	0.181636	0.221284	0.869305	0.0307378	0.136487	0.568736	0.00176287	0.0475164
rs10946999	29679588	rs10946999	logistic	1	2	29679588	0.265467	0.973393	0.305241	0.519065	0.921854	0.558591	0.0802805	0.205062
rs10947045	30097668	rs10947045	logistic	1	2	30097668	5.07e-05	0.297428	6.49e-06	0.030915	0.0201194	0.119934	0.457613	0.20021
rs10947046	30108952	rs10947046	logistic	1	2	30108952	4.79e-05	0.307783	6.09e-06	0.0288124	0.0179957	0.0900953	0.44953	0.196949
rs10947047	30115690	rs10947047	logistic	1	2	30115690	6.27e-05	0.295433	6.73e-06	0.031366	0.0205755	0.0859218	0.457621	0.200204
rs10947050	30148270	rs10947050	logistic	1	2	30148270	6.32e-60	0.910314	4.85e-49	2.07e-26	5.85e-11	0.000285901	0.00012545	0.0221572
rs10947056	30203582	rs10947056	logistic	1	2	30203582	1.67e-09	0.143337	4.65e-11	6.37e-05	0.346866	0.0270565	0.681847	0.647628
rs10947058	30284101	rs10947058	logistic	1	2	30284101	1.65e-14	0.227048	5.35e-14	3.27e-06	0.000406548	0.273625	0.928977	0.784068
rs10947061	30314638	rs10947061	logistic	1	2	30314638	0.655543	0.00820367	0.721532	0.0762752	0.312437	0.260684	0.000120635	0.539185
rs10947072	30480257	rs10947072	logistic	1	2	30480257	1.5e-19	0.479871	2.19e-13	3.1e-05	4.47e-08	0.252105	2.42e-05	0.903369
rs10947087	30780442	rs10947087	logistic	1	2	30780442	0.0048024	0.997543	0.0164824	0.198473	0.0271211	0.188891	0.090524	0.259757
rs10947088	30817809	rs10947088	logistic	1	2	30817809	0.00649123	0.706488	0.365913	0.00137177	0.42319	0.0111027	0.684605	0.608699
rs10947096	30873874	rs10947096	logistic	1	2	30873874	2.88e-18	0.233922	6.27e-13	0.000113495	6.61e-08	0.0506523	6.42e-05	0.988184
rs10947109	30944204	rs10947109	logistic	1	2	30944204	0.0829153	0.399552	0.0733663	0.0951465	0.826096	0.626384	0.259641	0.592822
rs10947129	31119641	rs10947129	logistic	1	2	31119641	1.25e-20	0.963326	3.52e-15	1.39e-08	0.000275007	0.336105	1.12e-12	0.0999872
rs10947130	31121725	rs10947130	logistic	1	2	31121725	2.75e-30	0.892028	1.57e-23	2.54e-11	1.79e-06	0.167418	2.19e-15	0.588632
rs10947131	31123915	rs10947131	logistic	1	2	31123915	3.36e-31	0.965626	8.89e-24	3.99e-12	7.07e-07	0.169628	6.18e-15	0.579805
rs10947206	31469376	rs10947206	logistic	1	2	31469376	9.57e-20	0.52271	2.36e-12	1.18e-05	0.000419304	0.0817581	5.52e-38	0.048548
rs10947207	31469464	rs10947207	logistic	1	2	31469464	8.77e-20	0.529701	2.02e-12	1.46e-05	0.000389819	0.0850857	1.25e-37	0.0477739
rs10947233	32232402	rs10947233	logistic	1	2	32232402	2.18e-09	0.89827	2.94e-11	0.000918769	2.56e-05	2.04e-06	0.927858	0.434799
rs10947260	32481163	rs10947260	logistic	1	2	32481163	1.13e-145	0.220615	2.09e-127	4.44e-65	1.16e-49	0.647682	0.0047989	0.00555444
rs10947261	32481210	rs10947261	logistic	1	2	32481210	7.76e-131	0.419374	5.68e-116	6.36e-58	8.2e-43	0.642312	0.0114197	0.0156704
rs10947262	32481290	rs10947262	logistic	1	2	32481290	7.9e-131	0.423799	3.68e-116	2.34e-58	1.03e-42	0.689645	0.0115974	0.0158515
rs1108052	30177774	rs1108052	logistic	1	2	30177774	2.33e-08	0.0350244	1.38e-06	7.03e-09	0.00324053	0.154124	0.0113169	0.878308
rs1109146	30737627	rs1109146	logistic	1	2	30737627	0.120702	0.757261	0.561882	0.898897	0.00272603	0.233696	0.483527	0.923266
rs1110446	30178916	rs1110446	logistic	1	2	30178916	8.52e-07	0.0779679	1.45e-05	3.07e-08	0.022443	0.259171	0.0496001	0.952665
rs1110464	30404050	rs1110464	logistic	1	2	30404050	0.00198579	0.0474312	0.0148852	0.00365675	0.166744	0.376192	0.012151	0.996098
rs11158	30260446	rs11158	logistic	1	2	30260446	0.357193	0.147127	0.358205	0.00349816	0.778586	0.0122733	0.00526783	0.629895
rs1116221	30179309	rs1116221	logistic	1	2	30179309	1.57e-06	0.00510275	2.13e-05	1.08e-08	0.0201674	0.223902	0.0211783	0.819471
rs1116222	30179258	rs1116222	logistic	1	2	30179258	9.24e-07	0.00723055	1.06e-05	8.29e-09	0.0224167	0.213056	0.0198324	0.837505
rs1117489	30278806	rs1117489	logistic	1	2	30278806	2.01e-07	0.608403	3.23e-06	8.78e-05	0.00457452	0.0911309	0.000687844	0.44716
rs1117490	30278489	rs1117490	logistic	1	2	30278489	2.92e-07	0.503327	3.05e-06	6.94e-05	0.00627953	0.0937574	0.000578151	0.380359
rs1119333	30425945	rs1119333	logistic	1	2	30425945	0.00299937	0.235898	0.106821	0.115686	0.128299	0.153852	0.550129	0.843862
rs1121800	31643053	rs1121800	logistic	1	2	31643053	1.6e-14	0.00566667	6.09e-08	0.00247665	0.000362976	0.0135097	0.0059466	0.309886
rs11244	32888701	rs11244	logistic	1	2	32888701	7.41e-17	0.373624	8.61e-11	0.000183284	4.36e-09	0.139406	0.176554	0.256818
rs1128306	30051248	rs1128306	logistic	1	2	30051248	3.58e-13	0.990124	2.38e-10	1.17e-05	0.000124628	0.228263	0.727501	0.329713
rs1129640	31614603	rs1129640	logistic	1	2	31614603	1.22e-14	0.0438325	3.1e-06	1.2e-05	1.93e-05	0.617008	0.000194329	0.0797909
rs1131896	31487094	rs1131896	logistic	1	2	31487094	8.69e-08	0.660398	1.51e-06	0.0688183	0.0330542	0.291361	6.75e-06	0.0218641
rs1135216	32922952	rs1135216	logistic	1	2	32922952	3.56e-30	0.0403262	1.04e-28	5.23e-10	1.12e-08	0.946449	0.365132	0.714799
rs1140809	30719655	rs1140809	logistic	1	2	30719655	0.0164987	0.175029	0.0193453	0.0153387	0.830848	0.215541	0.0520944	0.331124
rs1144708	31817999	rs1144708	logistic	1	2	31817999	1.28e-07	0.418753	1.53e-06	0.0320814	0.0124323	0.425233	0.707824	0.03961
rs1150734	30153689	rs1150734	logistic	1	2	30153689	4.19e-17	0.0526862	3.43e-09	0.000821993	3.86e-06	0.046066	0.0456594	0.204348
rs1150735	30153178	rs1150735	logistic	1	2	30153178	0.00564146	0.250202	0.000805805	0.00150147	0.633251	0.54642	0.314754	0.978018
rs1150736	30150934	rs1150736	logistic	1	2	30150934	0.720031	0.021359	0.258774	0.0241856	0.164357	0.872452	0.270112	0.66969
rs1150738	30143068	rs1150738	logistic	1	2	30143068	2.25e-11	0.806513	5.04e-08	2.88e-05	0.00114214	0.267992	0.594217	0.0985487
rs1150739	30139324	rs1150739	logistic	1	2	30139324	0.0167726	0.0156586	0.00190391	0.0026502	0.773275	0.745297	0.0552704	0.810452
rs1150740	30138668	rs1150740	logistic	1	2	30138668	1.76e-11	0.717548	5.57e-08	3.02e-05	0.000976365	0.271785	0.599312	0.099591
rs1150742	30136810	rs1150742	logistic	1	2	30136810	0.995878	0.014443	0.59815	0.0274662	0.131302	0.942667	0.0860336	0.852123
rs1150743	30100240	rs1150743	logistic	1	2	30100240	1.54e-06	0.0711673	0.00233714	0.00288275	1.03e-05	0.282206	0.409742	0.0983877
rs1150753	32167845	rs1150753	logistic	1	2	32167845	0.386237	0.0488404	0.459815	0.0345375	0.945056	0.392651	0.00430436	0.846717
rs1150754	32158736	rs1150754	logistic	1	2	32158736	0.0322687	0.0872219	0.0505828	0.00144704	0.590501	0.0652834	1.19e-05	0.553899
rs1150755	32146528	rs1150755	logistic	1	2	32146528	0.0391293	0.0872456	0.06286	0.00189207	0.590363	0.0652096	1.19e-05	0.553814
rs1150758	32136127	rs1150758	logistic	1	2	32136127	0.0410931	0.0891187	0.0606452	0.00185208	0.615635	0.0526974	1.19e-05	0.557147
rs1150765	31235541	rs1150765	logistic	1	2	31235541	6.35e-10	0.0846674	5.54e-12	1.33e-06	0.0808343	0.978082	2.9e-05	0.0583676
rs1150770	30491935	rs1150770	logistic	1	2	30491935	0.00378741	0.441333	0.00114693	0.475856	0.0929254	0.678784	0.105489	0.659373
rs1150771	30492488	rs1150771	logistic	1	2	30492488	1.47e-28	0.0902221	8.75e-17	7.16e-08	4.6e-08	0.000160715	0.000969229	0.280158
rs1150772	30492650	rs1150772	logistic	1	2	30492650	0.176979	0.462544	0.0320003	0.388985	0.990131	0.0341138	0.0437397	0.694204
rs1150793	31825675	rs1150793	logistic	1	2	31825675	0.00698534	0.760949	0.568283	0.0585738	0.00383053	0.270997	0.161892	0.0575096
rs11531	31858488	rs11531	logistic	1	2	31858488	3.51e-08	0.661404	9.45e-05	0.00505412	0.0337608	0.0513065	0.0259695	0.164236
rs11538264	31711168	rs11538264	logistic	1	2	31711168	0.0731356	0.235519	0.0725237	0.483405	0.861577	0.334603	0.555046	0.137731
rs11539216	33025958	rs11539216	logistic	1	2	33025958	0.0481243	0.27598	0.167248	0.0865384	0.452304	0.918693	0.0307271	0.392562
rs1156534	30173131	rs1156534	logistic	1	2	30173131	0.022617	0.667483	0.00907878	0.97968	0.843504	0.0542461	0.783918	0.019875
rs11575839	31665770	rs11575839	logistic	1	2	31665770	0.9507	0.0220425	0.322397	0.649474	0.147068	0.210702	0.0867439	0.669525
rs1158784	32866739	rs1158784	logistic	1	2	32866739	3.39e-18	0.202756	1.8e-10	7.93e-07	2.7e-10	0.760609	0.0252108	0.00934787
rs11751198	31861505	rs11751198	logistic	1	2	31861505	5.86e-08	0.111379	9.88e-06	0.00596921	0.0212234	0.226127	0.283697	0.518081
rs11751282	29872686	rs11751282	logistic	1	2	29872686	0.109924	0.859126	0.779376	0.0596376	0.0898804	0.417848	0.574844	0.914739
rs11751333	29876116	rs11751333	logistic	1	2	29876116	0.227347	0.850936	0.567225	0.156855	0.113954	0.380535	0.651802	0.967837
rs11751659	33189610	rs11751659	logistic	1	2	33189610	0.151361	0.944653	0.231507	0.0447029	0.254975	0.00319038	0.828679	0.156222
rs11751697	32374403	rs11751697	logistic	1	2	32374403	8.04e-132	0.0476828	8.88e-117	2.27e-63	2.04e-38	0.271649	5.84e-05	0.00900566
rs11751820	29882166	rs11751820	logistic	1	2	29882166	0.0231592	0.544027	0.309677	0.0642799	0.0734212	0.174406	0.615409	0.426827
rs11752177	31035846	rs11752177	logistic	1	2	31035846	0.000819216	0.999226	1.49e-05	0.125425	0.397997	0.600528	0.431244	0.813587
rs11752362	30368961	rs11752362	logistic	1	2	30368961	0.0127715	0.93629	0.00537828	0.0344144	0.447663	0.00745254	0.396295	0.528326
rs11752643	32777351	rs11752643	logistic	1	2	32777351	0.836316	0.124862	0.0935692	0.96835	0.0828066	0.0101572	0.298498	0.98008
rs11753208	31113411	rs11753208	logistic	1	2	31113411	0.485196	0.0982997	0.984321	0.439898	0.504577	0.288163	0.108215	0.704108
rs11753326	31033964	rs11753326	logistic	1	2	31033964	0.121232	0.529171	0.0684649	0.454969	0.472126	0.58473	0.322051	0.898215
rs11753401	31108367	rs11753401	logistic	1	2	31108367	6.17e-24	0.774388	3.08e-19	1.8e-10	5.54e-05	0.615298	1.7e-13	0.719325
rs11753431	30087622	rs11753431	logistic	1	2	30087622	6.27e-05	0.295433	6.73e-06	0.031366	0.0205755	0.0859218	0.457621	0.200204
rs11753629	29890310	rs11753629	logistic	1	2	29890310	0.215973	0.462682	0.152292	0.639934	0.411537	0.0560096	0.442294	0.00912526
rs11753736	30267245	rs11753736	logistic	1	2	30267245	5.43e-14	0.542441	7.49e-14	2.35e-06	0.000526996	0.320814	0.907233	0.800571
rs11753831	33085022	rs11753831	logistic	1	2	33085022	0.175691	0.0968381	0.00833965	0.842569	0.697781	0.0937308	0.186041	0.567629
rs11753872	29844921	rs11753872	logistic	1	2	29844921	0.136172	0.880275	0.833456	0.117859	0.116603	0.414384	0.565048	0.90585
rs11753939	30147746	rs11753939	logistic	1	2	30147746	5.79e-05	0.298903	6.44e-06	0.030854	0.0200087	0.0872927	0.455063	0.199201
rs11753960	30088219	rs11753960	logistic	1	2	30088219	6.65e-05	0.295115	6.65e-06	0.0312335	0.0231062	0.0862575	0.456098	0.199419
rs11754586	31109890	rs11754586	logistic	1	2	31109890	3.12e-22	0.729861	5.05e-17	4.79e-10	0.000318061	0.190848	1.47e-12	0.810003
rs11754821	31185593	rs11754821	logistic	1	2	31185593	0.000114836	0.774794	0.00110938	0.624016	0.00411285	0.544674	0.0625666	0.243269
rs11755961	30061078	rs11755961	logistic	1	2	30061078	5.92e-05	0.284945	5.88e-06	0.033477	0.0187845	0.0824462	0.463201	0.20231
rs11755966	30060910	rs11755966	logistic	1	2	30060910	9.56e-05	0.305159	2.12e-05	0.029727	0.0188846	0.089971	0.447778	0.195784
rs11755984	30061014	rs11755984	logistic	1	2	30061014	6.33e-05	0.288636	5.51e-06	0.0326967	0.0221047	0.0837564	0.460291	0.201036
rs11755992	30061249	rs11755992	logistic	1	2	30061249	6.15e-05	0.290224	5.43e-06	0.0325362	0.0218681	0.0843691	0.459665	0.200892
rs11756897	33007117	rs11756897	logistic	1	2	33007117	4.12e-08	0.880439	1.19e-07	0.0217196	0.0189087	0.031154	0.835083	0.378904
rs11757182	29883504	rs11757182	logistic	1	2	29883504	0.120253	0.862688	0.698064	0.0586566	0.0844673	0.416564	0.574628	0.914368
rs11757306	30915037	rs11757306	logistic	1	2	30915037	0.0154886	0.905397	0.0139076	0.344676	0.121545	0.277797	0.132754	0.319052
rs11757629	30852508	rs11757629	logistic	1	2	30852508	0.00269764	0.380223	0.0495809	0.0404292	0.238777	0.710491	0.326875	0.228797
rs11757750	30060141	rs11757750	logistic	1	2	30060141	6.39e-05	0.288237	5.54e-06	0.0327879	0.0221843	0.083593	0.460721	0.201202
rs11758087	29872422	rs11758087	logistic	1	2	29872422	0.132073	0.85282	0.766687	0.0608122	0.120591	0.421783	0.578468	0.918322
rs11758242	31747824	rs11758242	logistic	1	2	31747824	0.171047	0.343129	0.132848	0.708522	0.699264	0.235456	0.701188	0.12242
rs11758243	30275764	rs11758243	logistic	1	2	30275764	0.00428059	0.258905	0.139033	0.0130102	0.000757515	0.0722137	0.84808	0.491981
rs11758312	32824350	rs11758312	logistic	1	2	32824350	3.33e-74	0.251668	7.92e-45	1e-20	3.69e-31	0.0160717	0.00178732	0.000158881
rs11758350	30276280	rs11758350	logistic	1	2	30276280	8.06e-14	0.551567	1.49e-13	2.5e-06	0.00056107	0.339029	0.92761	0.794799
rs11758516	30151465	rs11758516	logistic	1	2	30151465	0.0119964	0.581423	0.00190384	0.0220029	0.112293	0.00959912	0.315165	0.363308
rs11759188	31109625	rs11759188	logistic	1	2	31109625	4.9e-24	0.774388	3.08e-19	1.8e-10	4.47e-05	0.615298	1.7e-13	0.719325
rs11759238	30450407	rs11759238	logistic	1	2	30450407	0.0297465	0.346258	0.0712241	0.104034	0.0590704	0.615573	0.264244	0.409225
rs11759388	30089712	rs11759388	logistic	1	2	30089712	6.27e-05	0.295433	6.73e-06	0.031366	0.0205755	0.0859218	0.457621	0.200204
rs11759423	32838370	rs11759423	logistic	1	2	32838370	8.19e-06	0.858822	1.55e-07	0.00627896	0.000971361	4.93e-06	0.582777	0.965452
rs11759549	29925902	rs11759549	logistic	1	2	29925902	4.61e-08	0.750036	3.89e-08	0.00699015	0.0541298	0.447791	0.569397	0.105658
rs11760001	30229222	rs11760001	logistic	1	2	30229222	0.0568701	0.165519	0.425864	0.0740045	0.00120436	0.0361516	0.593184	0.597516
rs11760176	30078406	rs11760176	logistic	1	2	30078406	1.68e-13	0.584385	9.25e-11	5.75e-05	6.86e-05	0.861698	0.0188595	0.858713
rs117821	32906689	rs117821	logistic	1	2	32906689	0.0141612	0.880104	0.143958	0.45066	0.0259681	0.796449	0.0465094	0.264804
rs11796	31609191	rs11796	logistic	1	2	31609191	1.08e-16	0.193416	1.01e-09	7.49e-05	0.0016256	0.0234549	4.6e-09	0.185254
rs11908	33052724	rs11908	logistic	1	2	33052724	7.03e-09	0.0896551	0.00635481	0.00433339	9.58e-05	0.0128992	0.267769	0.0115444
rs11961569	32972659	rs11961569	logistic	1	2	32972659	4.16e-13	0.501426	9.06e-11	0.000331084	0.000204741	0.113348	0.359336	0.231951
rs11961853	30473608	rs11961853	logistic	1	2	30473608	0.25787	0.338397	0.0309285	0.0179971	0.429532	0.0492031	0.00732703	0.502376
rs11961941	30239506	rs11961941	logistic	1	2	30239506	0.019962	0.305318	0.0374607	0.392959	0.00710245	0.0351434	0.107916	0.241374
rs11961983	31276462	rs11961983	logistic	1	2	31276462	0.0226175	0.010637	0.0295421	0.627954	0.837033	0.26071	0.00796931	0.568664
rs11962017	29781979	rs11962017	logistic	1	2	29781979	0.220629	0.790382	0.715786	0.354463	0.101004	0.999499	0.0946717	0.663229
rs11962771	30115963	rs11962771	logistic	1	2	30115963	0.000190975	0.244131	7.03e-06	0.0488318	0.0442426	0.0648748	0.447772	0.196271
rs11963774	32972445	rs11963774	logistic	1	2	32972445	4.13e-13	0.501201	9.02e-11	0.000330582	0.000204223	0.113282	0.359277	0.231928
rs11963870	30843208	rs11963870	logistic	1	2	30843208	0.00797824	0.694564	0.00614335	0.0219466	0.620163	0.363281	0.610236	0.167452
rs11963959	30536855	rs11963959	logistic	1	2	30536855	0.023824	0.824665	0.000291451	0.743383	0.0253427	0.0335673	0.601014	0.638297
rs11964080	31078949	rs11964080	logistic	1	2	31078949	3.43e-06	0.219414	0.0105147	0.00965862	0.000833746	0.395796	0.262043	0.0762418
rs11964188	33043186	rs11964188	logistic	1	2	33043186	2.94e-05	0.535784	0.00302755	0.120431	0.0124526	0.158283	0.61876	0.119583
rs11964504	33091726	rs11964504	logistic	1	2	33091726	0.93063	0.0401529	0.492551	0.53438	0.362488	0.919676	0.0808129	0.250754
rs11964507	33091743	rs11964507	logistic	1	2	33091743	0.93063	0.0401529	0.492551	0.53438	0.362488	0.919676	0.0808129	0.250754
rs11964542	30179739	rs11964542	logistic	1	2	30179739	0.244251	0.459428	0.799625	0.155462	0.132889	0.287104	0.799574	0.904854
rs11965379	30149488	rs11965379	logistic	1	2	30149488	6.04e-05	0.296689	6.58e-06	0.0311232	0.0203259	0.0864368	0.456211	0.199537
rs11965452	30119781	rs11965452	logistic	1	2	30119781	0.00426321	0.375783	0.00696995	0.193031	0.028569	0.281586	0.206416	0.446605
rs11965524	30081166	rs11965524	logistic	1	2	30081166	7.44e-05	0.288982	7.62e-06	0.0327585	0.0220784	0.083766	0.461466	0.201712
rs11965547	31944130	rs11965547	logistic	1	2	31944130	9.22e-06	0.779838	0.00171235	0.00172942	0.00516834	0.00157751	0.0119197	0.33428
rs11965585	30090408	rs11965585	logistic	1	2	30090408	6.27e-05	0.295433	6.73e-06	0.031366	0.0205755	0.0859218	0.457621	0.200204
rs11965659	30090742	rs11965659	logistic	1	2	30090742	6.07e-05	0.296593	6.58e-06	0.0311198	0.020321	0.0863374	0.456674	0.199783
rs11965797	30165742	rs11965797	logistic	1	2	30165742	0.241863	0.599127	0.827972	0.161075	0.173057	0.284506	0.805798	0.580079
rs11966040	30837466	rs11966040	logistic	1	2	30837466	0.00653297	0.84092	0.00566855	0.0222262	0.466411	0.405579	0.607162	0.165866
rs11966619	30537012	rs11966619	logistic	1	2	30537012	0.0239828	0.817711	0.000308815	0.734468	0.0233085	0.032709	0.596052	0.63405
rs11967235	32889411	rs11967235	logistic	1	2	32889411	3.09e-24	0.490158	2.67e-21	8.85e-07	3.91e-12	0.186358	0.0191927	0.814531
rs11967911	30168931	rs11967911	logistic	1	2	30168931	3.84e-12	0.394623	4.23e-07	6.81e-07	1.59e-05	0.406813	0.167306	0.836865
rs11968400	31912708	rs11968400	logistic	1	2	31912708	2.62e-10	0.0197111	1.33e-07	0.00625141	0.000897867	0.967098	0.161213	0.626801
rs11969522	32967803	rs11969522	logistic	1	2	32967803	0.192228	0.0487409	0.101653	0.466972	0.130205	0.0103336	0.775604	0.00394859
rs11970154	31027857	rs11970154	logistic	1	2	31027857	0.120197	0.749332	0.673475	0.284632	0.0919285	0.664538	0.0141336	0.114955
rs11970259	30390729	rs11970259	logistic	1	2	30390729	0.0228023	0.341432	0.0283646	0.340003	0.012761	0.0392573	0.209704	0.24979
rs12055568	32300061	rs12055568	logistic	1	2	32300061	0.0194045	0.552103	0.150186	0.0572368	0.00490877	0.156509	0.42736	0.582363
rs12111032	31350170	rs12111032	logistic	1	2	31350170	0.00206403	0.392409	0.000435949	0.0586844	0.992956	0.749213	4.6e-05	0.00571072
rs12153855	32182782	rs12153855	logistic	1	2	32182782	4.35e-34	0.105415	8.01e-21	4.68e-09	4.25e-12	0.011419	0.00260081	0.231277
rs12174151	30682173	rs12174151	logistic	1	2	30682173	4.38e-15	0.773167	3.41e-11	0.000104729	1.64e-05	0.591817	8.77e-08	0.96545
rs12174396	31482558	rs12174396	logistic	1	2	31482558	0.0446666	0.167048	0.0572487	0.867411	0.132207	2.21e-05	0.00145067	0.13788
rs12174433	30553455	rs12174433	logistic	1	2	30553455	0.000402249	0.848625	5.47e-05	0.187978	0.159728	0.309664	0.902942	0.610512
rs12174774	31376944	rs12174774	logistic	1	2	31376944	1.08e-07	0.0330562	0.000877148	0.000312492	5.52e-05	0.225487	0.504391	0.518953
rs12174823	30400062	rs12174823	logistic	1	2	30400062	0.160717	0.483713	0.293832	0.26222	0.368714	0.463506	0.436911	0.897502
rs12174870	30544660	rs12174870	logistic	1	2	30544660	2.32e-16	0.646988	3.54e-09	3.81e-07	3.73e-05	0.00371239	4.9e-05	0.406871
rs12175453	30322326	rs12175453	logistic	1	2	30322326	0.618156	0.0150716	0.751511	0.0472428	0.470894	0.266516	0.000114728	0.544645
rs12175655	30262889	rs12175655	logistic	1	2	30262889	0.00142276	0.317093	0.0255265	0.171657	0.00136083	0.499977	0.479777	0.351116
rs12176318	30320407	rs12176318	logistic	1	2	30320407	0.599793	0.014667	0.733789	0.0630479	0.460719	0.261799	0.000111944	0.54688
rs12176323	30320483	rs12176323	logistic	1	2	30320483	0.602676	0.0138553	0.729365	0.0627387	0.452609	0.262093	0.000111958	0.545978
rs12179536	31101569	rs12179536	logistic	1	2	31101569	0.159985	0.269113	0.201098	0.043086	0.254839	0.903544	0.346581	0.585223
rs12182351	32309685	rs12182351	logistic	1	2	32309685	1.19e-06	0.157137	0.000210307	0.00692477	0.000105557	0.0224274	0.368785	0.16915
rs12189871	31359903	rs12189871	logistic	1	2	31359903	9.53e-17	0.617102	2.39e-14	1.1e-05	0.00108365	0.000253282	0.0070686	0.00792672
rs12190167	30874173	rs12190167	logistic	1	2	30874173	1.38e-18	0.336211	5.42e-15	0.000375877	1.62e-10	0.0266643	0.32881	0.372219
rs12191230	33076576	rs12191230	logistic	1	2	33076576	0.92895	0.661739	0.643277	0.269143	0.666329	0.149403	0.0469177	0.431738
rs12192673	30620484	rs12192673	logistic	1	2	30620484	1.97e-21	0.55951	1.07e-13	7.4e-11	2.2e-06	0.931649	1e-12	0.0552964
rs12192713	33076834	rs12192713	logistic	1	2	33076834	0.937539	0.661739	0.643277	0.269143	0.666329	0.172956	0.0469177	0.431738
rs12192828	30900471	rs12192828	logistic	1	2	30900471	2.91e-17	0.502116	1.1e-13	0.000622727	3.55e-09	0.00789062	0.562371	0.596399
rs12193110	30045083	rs12193110	logistic	1	2	30045083	1.1e-54	0.6014	5.03e-42	3.06e-23	1.66e-09	5.46e-06	8.89e-05	0.0204672
rs12193208	30045128	rs12193208	logistic	1	2	30045128	1.1e-54	0.6014	5.03e-42	3.06e-23	1.66e-09	5.46e-06	8.89e-05	0.0204672
rs12195260	30046434	rs12195260	logistic	1	2	30046434	2.23e-57	0.834223	5.37e-45	1.51e-24	6.98e-11	1.41e-05	0.000676032	0.0260616
rs12195508	30897644	rs12195508	logistic	1	2	30897644	2.69e-17	0.503941	1.05e-13	0.000613686	3.43e-09	0.00781869	0.560845	0.597552
rs12196237	31077760	rs12196237	logistic	1	2	31077760	0.87597	0.392219	0.723091	0.248938	0.702119	0.00366575	0.0154403	0.500212
rs12196597	33049192	rs12196597	logistic	1	2	33049192	0.940868	0.39757	0.181636	0.0869202	0.293513	0.302875	0.4646	0.6752
rs12197587	31113753	rs12197587	logistic	1	2	31113753	0.000794776	0.85082	0.000690546	0.227526	0.0573785	0.473572	0.408253	0.0105314
rs12198173	32134786	rs12198173	logistic	1	2	32134786	1.04e-23	0.333577	2.97e-16	2.05e-06	1.62e-07	0.0301253	0.00355524	0.476678
rs12198448	31100325	rs12198448	logistic	1	2	31100325	0.957137	0.61901	0.331943	0.302411	0.423279	0.005478	0.0203675	0.963424
rs12198723	30904713	rs12198723	logistic	1	2	30904713	4.91e-17	0.506694	2.07e-13	0.000817908	3.32e-09	0.00776132	0.559584	0.598718
rs12198842	30904911	rs12198842	logistic	1	2	30904911	1.03e-15	0.680388	1.81e-11	0.000722427	4.03e-08	0.00076894	0.608583	0.540545
rs12199223	31350710	rs12199223	logistic	1	2	31350710	2.82e-16	0.585332	1e-13	1.4e-05	0.000930539	0.000294189	0.00771797	0.0072816
rs12199460	31202707	rs12199460	logistic	1	2	31202707	1.07e-10	0.492526	2.15e-09	6.67e-05	0.0247228	6.18e-05	0.272268	0.00743461
rs12199611	30474154	rs12199611	logistic	1	2	30474154	3.6e-23	0.966952	7.44e-17	1.12e-06	1.98e-09	0.272023	1.63e-05	0.737911
rs12200084	30148582	rs12200084	logistic	1	2	30148582	6.32e-60	0.910314	4.85e-49	2.07e-26	5.85e-11	0.000285901	0.00012545	0.0221572
rs12200562	30884600	rs12200562	logistic	1	2	30884600	3.44e-17	0.471779	7.54e-14	0.000797171	6.66e-09	0.00920174	0.47618	0.732644
rs12201248	31177455	rs12201248	logistic	1	2	31177455	5.82e-12	0.608653	7.69e-10	2.58e-05	0.0218461	5.2e-05	0.0657067	0.010516
rs12201301	31115536	rs12201301	logistic	1	2	31115536	0.000780836	0.84935	0.000683671	0.226777	0.0570614	0.472659	0.407865	0.0105719
rs12202131	30221529	rs12202131	logistic	1	2	30221529	2.72e-13	0.801163	3.1e-14	3.26e-07	0.00582786	0.236243	0.737039	0.85984
rs12202207	31161822	rs12202207	logistic	1	2	31161822	0.00256643	0.87342	0.0033021	0.413418	0.045203	0.692243	0.382331	0.0328951
rs12202428	30827888	rs12202428	logistic	1	2	30827888	6.73e-20	0.535719	1.62e-13	6.2e-07	0.000252718	0.782461	4.98e-21	0.0860085
rs12203410	31086725	rs12203410	logistic	1	2	31086725	0.217328	0.663612	0.303625	0.375768	0.622036	0.024193	0.0192415	0.713318
rs12203797	30898786	rs12203797	logistic	1	2	30898786	2.92e-17	0.376303	8.51e-14	0.00176124	6.38e-10	0.0319164	0.395278	0.990222
rs12203825	30479980	rs12203825	logistic	1	2	30479980	1.17e-19	0.582357	1.84e-13	2.71e-05	3.44e-08	0.243066	2.24e-05	0.894194
rs12204919	32793658	rs12204919	logistic	1	2	32793658	2.11e-06	0.111588	1.77e-05	0.0312392	0.122037	0.139533	0.36803	0.0954627
rs12206022	30900343	rs12206022	logistic	1	2	30900343	3.78e-17	0.349648	6.19e-14	0.0022186	1.24e-09	0.036311	0.331248	0.8517
rs12206377	33017313	rs12206377	logistic	1	2	33017313	0.00121101	0.0084637	4.91e-05	0.719086	0.958426	0.403461	0.95177	0.996782
rs12207404	31344180	rs12207404	logistic	1	2	31344180	2.12e-09	0.757363	9.3e-08	0.00852933	0.0159877	0.00114875	0.000545965	0.0264499
rs12207756	31194661	rs12207756	logistic	1	2	31194661	3.09e-12	0.693955	2.62e-10	1.87e-05	0.0206758	3.2e-05	0.135182	0.00564076
rs12208652	31095149	rs12208652	logistic	1	2	31095149	0.843309	0.369387	0.711936	0.227374	0.604007	0.00339812	0.0109375	0.568889
rs12208867	30134215	rs12208867	logistic	1	2	30134215	7.07e-17	0.616345	1.33e-16	2.51e-08	0.00185383	0.0305354	0.732323	0.863773
rs12208931	31407142	rs12208931	logistic	1	2	31407142	0.4766	0.924423	0.30288	0.189125	0.740282	0.0135988	0.000488131	0.00407108
rs12209312	31352690	rs12209312	logistic	1	2	31352690	9.89e-10	0.907421	3.2e-08	0.0183679	0.0135953	0.000834105	0.000869776	0.0265476
rs12210092	30824698	rs12210092	logistic	1	2	30824698	5.15e-22	0.622052	7.39e-15	3.09e-08	9.73e-08	0.640642	1.07e-13	0.0391184
rs12210298	30229504	rs12210298	logistic	1	2	30229504	3.51e-12	0.390077	9.93e-12	5.92e-06	0.000617922	0.236252	0.304778	0.353824
rs12210359	30074875	rs12210359	logistic	1	2	30074875	2.2e-14	0.355384	3.08e-13	2.81e-07	0.000944849	0.0730327	0.702254	0.684236
rs12210947	30843084	rs12210947	logistic	1	2	30843084	4.64e-17	0.344265	1e-14	0.00137813	5.26e-06	0.0147916	3.65e-05	0.660115
rs12211072	31090927	rs12211072	logistic	1	2	31090927	0.801951	0.373442	0.717819	0.2237	0.547106	0.00347852	0.0176899	0.571563
rs12211410	32157401	rs12211410	logistic	1	2	32157401	1.45e-23	0.353074	4.75e-16	1.48e-06	3.17e-07	0.0232788	0.00212533	0.466382
rs12212039	30176174	rs12212039	logistic	1	2	30176174	7.55e-18	0.952765	1.71e-17	5.37e-08	0.000825849	0.0293312	0.340862	0.617433
rs12212092	30236421	rs12212092	logistic	1	2	30236421	1.22e-08	0.0893696	8.31e-10	0.00310231	0.0896662	0.127612	0.991102	0.475226
rs12212418	31032003	rs12212418	logistic	1	2	31032003	0.245798	0.762376	0.547315	0.385603	0.461393	0.0925301	0.149505	0.736876
rs12212594	31408798	rs12212594	logistic	1	2	31408798	3.33e-12	0.395163	5.59e-12	0.00018123	0.00876384	0.00283419	0.0207802	0.00451394
rs12212837	30901646	rs12212837	logistic	1	2	30901646	2.16e-17	0.578218	1.05e-13	0.000613686	3.43e-09	0.00781869	0.560845	0.597552
rs12215079	32488656	rs12215079	logistic	1	2	32488656	1.61e-08	0.117479	5.4e-07	0.0142567	0.0145443	0.145947	0.145046	0.134414
rs12215548	31094623	rs12215548	logistic	1	2	31094623	0.795474	0.372053	0.721778	0.224879	0.543814	0.00344832	0.0177683	0.570384
rs12215963	31246598	rs12215963	logistic	1	2	31246598	0.000680269	0.211687	0.00123829	0.555174	0.0519355	0.585734	0.340992	0.0456408
rs12216336	33075719	rs12216336	logistic	1	2	33075719	0.232373	0.308826	0.405225	0.140939	0.391195	0.353478	0.135843	0.56866
rs1233330	29907082	rs1233330	logistic	1	2	29907082	1.36e-09	0.488314	1.77e-07	0.00404924	0.00439392	0.0793815	0.016932	0.907008
rs1233374	29716673	rs1233374	logistic	1	2	29716673	0.00236452	0.150909	0.0570717	0.0547727	0.170199	0.201862	0.0138374	0.143654
rs1233384	29667274	rs1233384	logistic	1	2	29667274	9.18e-29	0.340245	5.44e-19	4.35e-16	4.68e-10	0.589146	0.0129944	7.29e-05
rs1233386	29666169	rs1233386	logistic	1	2	29666169	7.17e-29	0.340245	5.44e-19	4.35e-16	3.43e-10	0.589146	0.0129944	7.29e-05
rs1233388	29661706	rs1233388	logistic	1	2	29661706	2.91e-08	0.655705	6.38e-05	0.000143168	0.000523311	0.508408	0.160494	7.19e-05
rs1233389	29660462	rs1233389	logistic	1	2	29660462	7.04e-26	0.515758	6.94e-17	3.89e-12	2.28e-09	0.466173	0.00331813	0.000215106
rs1233390	29659840	rs1233390	logistic	1	2	29659840	3.45e-26	0.536991	5.9e-17	2.88e-12	1.17e-09	0.521786	0.00314974	0.000203196
rs1233391	29658597	rs1233391	logistic	1	2	29658597	1.04e-08	0.666622	4.22e-05	8.07e-05	0.000331862	0.508169	0.141075	5.74e-05
rs1233393	29657632	rs1233393	logistic	1	2	29657632	0.451728	0.0542375	0.44108	0.000691465	0.541975	0.00245026	0.051111	0.321999
rs1233394	29657240	rs1233394	logistic	1	2	29657240	6e-27	0.337841	7.99e-18	1.59e-12	1.46e-10	0.516557	0.010095	0.00011635
rs1233396	29654778	rs1233396	logistic	1	2	29654778	0.505066	0.0464234	0.526877	0.00142922	0.582761	0.0027061	0.0385044	0.304432
rs1233397	29653694	rs1233397	logistic	1	2	29653694	8.18e-07	0.334767	0.000181131	0.000678832	0.00132032	0.372788	0.232112	0.000185069
rs1233399	29647461	rs1233399	logistic	1	2	29647461	7.74e-13	0.0628668	4.88e-09	3.41e-06	5.63e-06	0.72581	0.000386878	0.0271644
rs1233400	29645954	rs1233400	logistic	1	2	29645954	1.43e-17	0.115991	2.64e-12	7.6e-08	8.14e-08	0.768529	0.0270887	0.00306449
rs1233405	29637733	rs1233405	logistic	1	2	29637733	0.161968	0.155529	0.117473	0.110389	0.410474	0.316554	0.231985	0.305504
rs1233417	29619829	rs1233417	logistic	1	2	29619829	0.32845	0.0311145	0.275029	0.461812	0.189877	0.420345	0.625908	0.0364226
rs1233420	29611302	rs1233420	logistic	1	2	29611302	0.0815465	0.0892875	0.0822035	0.0867097	0.196023	0.343551	0.0827766	0.35123
rs1233421	29609493	rs1233421	logistic	1	2	29609493	0.0386486	0.155045	0.0640002	0.0598267	0.177178	0.382821	0.0528955	0.285299
rs1233425	29606476	rs1233425	logistic	1	2	29606476	0.180496	0.145699	0.165752	0.208801	0.318787	0.320641	0.0386695	0.413473
rs1233426	29606081	rs1233426	logistic	1	2	29606081	0.172573	0.362566	0.185508	0.218778	0.431303	0.474477	0.0522009	0.447574
rs1233427	29604643	rs1233427	logistic	1	2	29604643	0.174476	0.361631	0.186825	0.219691	0.433414	0.473324	0.0524097	0.448345
rs1235162	29645203	rs1235162	logistic	1	2	29645203	0.357551	0.0544446	0.404629	0.000676367	0.4606	0.00372157	0.0509946	0.441073
rs1245218	30456021	rs1245218	logistic	1	2	30456021	4.75e-36	0.063981	1.93e-19	1.66e-10	1.36e-10	1.04e-05	0.000196852	0.464565
rs12524063	32405288	rs12524063	logistic	1	2	32405288	1.4e-07	0.658303	0.00310247	0.000304103	0.000468025	0.0198578	0.627241	0.304331
rs12524441	32132212	rs12524441	logistic	1	2	32132212	0.194832	0.846901	0.278054	0.674822	0.564861	0.169449	0.916945	0.762419
rs12524487	31462217	rs12524487	logistic	1	2	31462217	0.57096	0.298924	0.290447	0.581335	0.19837	2e-07	0.0100358	0.600089
rs12525160	29643196	rs12525160	logistic	1	2	29643196	1.3e-08	0.897314	0.000167532	0.00648456	0.00117109	0.046193	0.00148091	0.767664
rs12525893	32328555	rs12525893	logistic	1	2	32328555	1.93e-06	0.405858	7.54e-08	0.10149	0.125957	0.36178	0.555234	0.787216
rs12526186	30844130	rs12526186	logistic	1	2	30844130	0.78578	0.900616	0.482826	0.214371	0.785223	0.0799785	0.826778	0.559304
rs12527715	32924976	rs12527715	logistic	1	2	32924976	6.5e-23	0.228031	6.65e-22	2.87e-07	7.7e-06	0.348742	0.503449	0.185888
rs12528017	29652530	rs12528017	logistic	1	2	29652530	4.55e-07	0.644775	8.89e-05	0.00422624	0.0154469	0.0494233	0.0362396	0.480261
rs12528082	31088726	rs12528082	logistic	1	2	31088726	1.23e-06	0.862166	3.83e-06	4e-08	0.107365	0.873667	0.966702	0.24468
rs12528087	31088582	rs12528087	logistic	1	2	31088582	0.0252539	0.947286	0.0584014	0.000172201	0.723563	0.803998	0.888874	0.209536
rs12528584	31119824	rs12528584	logistic	1	2	31119824	1.25e-20	0.963326	3.52e-15	1.39e-08	0.000275007	0.336105	1.12e-12	0.0999872
rs12528892	32801484	rs12528892	logistic	1	2	32801484	0.000536495	0.53144	0.0550122	0.115902	0.0034061	0.126496	0.302591	0.593612
rs12529049	32465693	rs12529049	logistic	1	2	32465693	8.83e-17	0.337215	3.07e-10	1.42e-07	2.04e-08	0.887971	0.000103197	0.694348
rs12529313	32925108	rs12529313	logistic	1	2	32925108	4.95e-23	0.221501	4.67e-22	3.74e-07	6.59e-06	0.340081	0.495907	0.182889
rs12529400	32441628	rs12529400	logistic	1	2	32441628	1.71e-07	0.651123	0.00496467	0.000289889	0.000435958	0.0194471	0.627135	0.209211
rs12530421	29657422	rs12530421	logistic	1	2	29657422	4.15e-08	0.738557	1.49e-06	0.00219976	0.019036	0.0674234	0.0666832	0.245044
rs12614	32022158	rs12614	logistic	1	2	32022158	0.00506844	0.560204	0.0275957	0.0124729	0.212208	0.665226	0.322055	0.446204
rs1264297	30992785	rs1264297	logistic	1	2	30992785	1.56e-06	0.596856	8.55e-05	0.00232881	0.13088	0.10626	1.51e-05	0.688897
rs1264298	30992415	rs1264298	logistic	1	2	30992415	1.64e-06	0.598243	9.6e-05	0.00230519	0.129863	0.105799	1.5e-05	0.689691
rs1264299	30991899	rs1264299	logistic	1	2	30991899	1.61e-06	0.599288	9.48e-05	0.00228998	0.129123	0.105545	1.49e-05	0.690325
rs1264300	30990835	rs1264300	logistic	1	2	30990835	1.47e-06	0.599288	8.28e-05	0.00228998	0.129123	0.105545	1.49e-05	0.690325
rs1264301	30990760	rs1264301	logistic	1	2	30990760	1.44e-06	0.600389	8.17e-05	0.00227509	0.128354	0.105227	1.48e-05	0.691052
rs1264303	30990492	rs1264303	logistic	1	2	30990492	1.47e-06	0.599288	8.28e-05	0.00228998	0.129123	0.105545	1.49e-05	0.690325
rs1264304	30990394	rs1264304	logistic	1	2	30990394	0.781957	0.0161794	0.151045	0.0159376	0.721958	0.01047	0.00395463	0.0399999
rs1264305	30990256	rs1264305	logistic	1	2	30990256	1.3e-06	0.600637	8.15e-05	0.00227122	0.12821	0.105116	9.12e-06	0.69152
rs1264307	30988736	rs1264307	logistic	1	2	30988736	2.22e-06	0.600746	9.29e-05	0.002727	0.137187	0.105092	3.78e-05	0.691272
rs1264308	30987966	rs1264308	logistic	1	2	30987966	0.781047	0.0162034	0.150825	0.0159082	0.722632	0.0104776	0.00395555	0.0400124
rs1264309	30983878	rs1264309	logistic	1	2	30983878	1.49e-06	0.598548	8.31e-05	0.00229213	0.129495	0.105638	1.49e-05	0.689762
rs1264312	30980961	rs1264312	logistic	1	2	30980961	0.760239	0.0162034	0.136974	0.0159082	0.722632	0.0104776	0.00395555	0.0400124
rs1264318	30971509	rs1264318	logistic	1	2	30971509	0.236954	0.084437	0.403224	0.088533	0.446555	0.132157	0.102645	0.0251708
rs1264322	30965873	rs1264322	logistic	1	2	30965873	0.754334	0.0163116	0.13568	0.0157801	0.726104	0.0105475	0.00393607	0.0401553
rs1264323	30963886	rs1264323	logistic	1	2	30963886	0.469913	0.0977892	0.886946	0.119486	0.14112	0.762515	0.200065	0.00480213
rs1264324	30963190	rs1264324	logistic	1	2	30963190	0.880617	0.0316989	0.187555	0.0188042	0.528665	0.00967581	0.00294626	0.0381901
rs1264326	30959888	rs1264326	logistic	1	2	30959888	0.739991	0.0171123	0.140358	0.0150437	0.747346	0.0110655	0.00385745	0.0392367
rs1264327	30958561	rs1264327	logistic	1	2	30958561	1.74e-08	0.572361	8.92e-06	0.000145112	0.0556331	0.0539967	4.2e-06	0.767453
rs1264331	30954809	rs1264331	logistic	1	2	30954809	6.8e-07	0.608766	4.83e-05	0.0014636	0.114075	0.103251	8.88e-06	0.594149
rs1264332	30953542	rs1264332	logistic	1	2	30953542	3.65e-07	0.646527	4.64e-05	0.00115777	0.0927488	0.0791306	7.46e-06	0.613951
rs1264333	30952293	rs1264333	logistic	1	2	30952293	8.42e-07	0.556003	6.49e-05	0.0014749	0.106765	0.103525	8.92e-06	0.593584
rs1264334	30952239	rs1264334	logistic	1	2	30952239	0.000130334	0.423703	0.00453493	0.00328229	0.228127	0.198406	5.29e-05	0.46415
rs1264341	30910444	rs1264341	logistic	1	2	30910444	0.755137	0.0160608	0.138621	0.0160776	0.718188	0.0140075	0.00397863	0.039832
rs1264344	30908556	rs1264344	logistic	1	2	30908556	8.75e-08	0.262594	1.18e-06	0.00130419	0.094571	0.228394	1.51e-06	0.614618
rs1264350	30904524	rs1264350	logistic	1	2	30904524	0.118057	0.0857251	0.0175933	0.00740632	0.776211	0.0159165	0.000198745	0.0187157
rs1264352	30897626	rs1264352	logistic	1	2	30897626	0.000469401	0.0421598	0.00189091	1.83e-05	0.155114	0.517873	0.000186695	0.140774
rs1264353	30895741	rs1264353	logistic	1	2	30895741	0.171134	0.040429	0.0340255	0.0045955	0.945007	0.0746599	0.000324304	0.0549788
rs1264361	30885477	rs1264361	logistic	1	2	30885477	0.153847	0.0401272	0.0312041	0.00359328	0.969021	0.0744111	0.000324673	0.0551301
rs1264362	30884569	rs1264362	logistic	1	2	30884569	5.28e-11	0.284723	1.22e-06	9.97e-07	0.0535089	0.580087	2.19e-07	0.241449
rs1264372	30877705	rs1264372	logistic	1	2	30877705	3.76e-10	0.308936	2.63e-06	0.376052	5.79e-07	0.000162298	0.035336	0.298222
rs1264373	30877252	rs1264373	logistic	1	2	30877252	0.556705	0.0431254	0.142213	0.017531	0.729113	0.025308	0.000998218	0.0611373
rs1264376	30873558	rs1264376	logistic	1	2	30873558	0.00448044	0.163839	0.00165815	0.000256357	0.337634	0.0365955	4.8e-05	0.089485
rs1264377	30872886	rs1264377	logistic	1	2	30872886	0.00359057	0.158654	0.00094444	0.000701382	0.23738	0.0252194	0.000103649	0.175638
rs1264419	30684760	rs1264419	logistic	1	2	30684760	0.0329963	0.212805	0.0444423	0.00961847	0.91841	0.237317	0.0498663	0.121935
rs1264420	30683582	rs1264420	logistic	1	2	30683582	0.000439825	0.235612	0.0125574	0.917814	0.00194863	0.459655	0.0337597	0.204034
rs1264423	30679450	rs1264423	logistic	1	2	30679450	0.0296138	0.200298	0.0449391	0.00999922	0.901424	0.222121	0.0417452	0.150759
rs1264429	30673080	rs1264429	logistic	1	2	30673080	0.95849	0.0670743	0.896038	0.55309	0.492314	0.769512	0.96169	0.674592
rs1264431	30670650	rs1264431	logistic	1	2	30670650	0.563675	0.117013	0.845472	0.830472	0.69419	0.491836	0.0369129	0.0385595
rs1264432	30670000	rs1264432	logistic	1	2	30670000	0.321268	0.142907	0.978836	0.803948	0.307046	0.316054	0.0309479	0.0537796
rs1264437	30661850	rs1264437	logistic	1	2	30661850	0.35638	0.148769	0.942708	0.826553	0.32769	0.325378	0.0297863	0.0550398
rs1264439	30660481	rs1264439	logistic	1	2	30660481	0.377802	0.151293	0.850111	0.867129	0.254475	0.349025	0.0232491	0.0739069
rs1264440	30659265	rs1264440	logistic	1	2	30659265	0.548071	0.115107	0.831065	0.821855	0.655641	0.487554	0.0373142	0.0382516
rs1264451	30649216	rs1264451	logistic	1	2	30649216	0.36332	0.166206	0.929441	0.894146	0.283343	0.296803	0.0285661	0.0897879
rs1264456	30570063	rs1264456	logistic	1	2	30570063	0.218684	0.318775	0.947386	0.655812	0.162384	0.250245	0.0326981	0.0585438
rs1264459	30563899	rs1264459	logistic	1	2	30563899	3.14e-21	0.499114	7.37e-12	5.34e-05	2.08e-09	0.0779874	0.00485291	0.0178708
rs1264510	30521990	rs1264510	logistic	1	2	30521990	1.66e-21	0.0911756	5.07e-12	6.44e-05	5.49e-08	0.0185078	0.0106459	0.0257478
rs1264511	30521951	rs1264511	logistic	1	2	30521951	0.116784	0.126795	0.437066	0.587152	0.820632	0.0194908	0.409864	0.469745
rs1264512	30521680	rs1264512	logistic	1	2	30521680	1.17e-28	0.0956372	9.77e-17	8.67e-08	3.13e-08	0.000121707	0.00101941	0.28616
rs1264513	30520341	rs1264513	logistic	1	2	30520341	0.000572239	0.373683	0.000157382	0.421091	0.048475	0.555147	0.119005	0.462684
rs1264514	30520024	rs1264514	logistic	1	2	30520024	0.114821	0.124487	0.438674	0.57847	0.829816	0.0190535	0.413835	0.466591
rs1264517	30518811	rs1264517	logistic	1	2	30518811	0.116902	0.126974	0.435053	0.587638	0.824174	0.0194441	0.409641	0.469419
rs1264518	30518185	rs1264518	logistic	1	2	30518185	0.729773	0.806314	0.0887515	0.717865	0.669935	0.0106039	0.206686	0.41829
rs1264524	30512765	rs1264524	logistic	1	2	30512765	0.000113797	0.304195	4.63e-05	0.342707	0.0272957	0.571469	0.202511	0.550851
rs1264537	30498178	rs1264537	logistic	1	2	30498178	0.000119704	0.304243	5.36e-05	0.321243	0.0293877	0.564077	0.205843	0.547167
rs1264539	30496680	rs1264539	logistic	1	2	30496680	1.9e-28	0.1045	1.77e-16	9.31e-08	3.17e-08	0.000105262	0.000935429	0.276463
rs1264541	30495318	rs1264541	logistic	1	2	30495318	0.000161192	0.557446	2.23e-06	0.000605964	0.341001	0.256735	0.775894	0.281012
rs1264542	30494975	rs1264542	logistic	1	2	30494975	0.123575	0.131677	0.459289	0.5305	0.884883	0.0164074	0.405113	0.473315
rs1264550	30485177	rs1264550	logistic	1	2	30485177	0.000194302	0.349077	0.000157312	0.295603	0.0272825	0.554898	0.304014	0.764981
rs1264551	30485152	rs1264551	logistic	1	2	30485152	1.59e-28	0.0463635	1.71e-16	6.49e-08	5.42e-08	0.000244353	0.00108297	0.288496
rs1264562	30480791	rs1264562	logistic	1	2	30480791	0.000193913	0.343108	0.000142842	0.288667	0.0281643	0.600366	0.307289	0.760772
rs1264567	30474079	rs1264567	logistic	1	2	30474079	0.290887	0.483172	0.0241152	0.272981	0.485359	0.0971258	0.301769	0.616372
rs1264569	30473299	rs1264569	logistic	1	2	30473299	1.5e-14	0.0677272	1.71e-06	0.000387598	4.12e-05	0.000472242	0.0317289	0.0393564
rs1264570	30473189	rs1264570	logistic	1	2	30473189	0.350109	0.220401	0.97759	0.930958	0.939172	0.00404333	0.433969	0.5184
rs1264581	30405484	rs1264581	logistic	1	2	30405484	2.21e-06	0.972343	5.38e-08	4.34e-05	0.109104	0.965945	0.30501	0.42665
rs1264582	30402569	rs1264582	logistic	1	2	30402569	1.98e-06	0.97327	3.85e-08	4.28e-05	0.114973	0.957741	0.304477	0.426622
rs1264583	30401462	rs1264583	logistic	1	2	30401462	5.99e-07	0.852932	4e-08	6.76e-06	0.118756	0.755775	0.30256	0.361602
rs1264585	30393629	rs1264585	logistic	1	2	30393629	9.69e-19	0.36116	9.47e-13	1.51e-09	8.92e-05	0.0146189	3.13e-06	0.645713
rs1264587	30387053	rs1264587	logistic	1	2	30387053	0.00760109	0.254983	0.00217882	0.676076	0.337589	0.0320244	0.00578673	0.775252
rs1264608	30386091	rs1264608	logistic	1	2	30386091	7.12e-07	0.852932	5.63e-08	6.76e-06	0.118756	0.755775	0.30256	0.361602
rs1264616	30372286	rs1264616	logistic	1	2	30372286	0.00989074	0.384059	0.10211	0.11332	0.0240245	0.329075	0.287493	0.229775
rs1264620	30367335	rs1264620	logistic	1	2	30367335	3.39e-18	0.10361	2.55e-09	0.00115043	3.76e-07	0.0150045	0.0238368	0.145786
rs1264622	30364915	rs1264622	logistic	1	2	30364915	0.00563428	0.19389	0.00225243	0.510975	0.383634	0.0190648	0.00364044	0.827204
rs1264691	30301853	rs1264691	logistic	1	2	30301853	5e-12	0.558523	2.66e-07	0.0213182	9.41e-06	0.654817	0.00228336	0.313579
rs1264695	30175871	rs1264695	logistic	1	2	30175871	2.13e-08	0.035562	1.32e-06	6.85e-09	0.00314573	0.1557	0.0112342	0.88088
rs1264696	30175813	rs1264696	logistic	1	2	30175813	7.63e-09	0.0585913	2.58e-07	6.02e-09	0.00474716	0.210429	0.0153881	0.809021
rs1264697	30175547	rs1264697	logistic	1	2	30175547	7.86e-09	0.0583279	2.62e-07	6.07e-09	0.00479214	0.209808	0.0154224	0.808241
rs1264698	30175156	rs1264698	logistic	1	2	30175156	7.92e-09	0.0582497	2.63e-07	6.08e-09	0.0048048	0.209557	0.0154332	0.808102
rs1264701	30174337	rs1264701	logistic	1	2	30174337	0.0230392	0.547482	0.00885257	0.989626	0.667354	0.0537303	0.853035	0.0221717
rs1264702	30173554	rs1264702	logistic	1	2	30173554	2.58e-08	0.0819059	1.56e-06	3.41e-09	0.00651204	0.143138	0.0111554	0.782212
rs1264703	30173395	rs1264703	logistic	1	2	30173395	7.11e-09	0.0760504	5.52e-07	4.26e-09	0.00567276	0.22486	0.00594366	0.916678
rs1264704	30173298	rs1264704	logistic	1	2	30173298	0.00126973	0.388404	0.000205461	0.653235	0.952806	0.0214483	0.748578	0.0875484
rs1264705	30171653	rs1264705	logistic	1	2	30171653	0.299416	0.0817503	0.335246	0.000279535	0.618206	0.00307258	0.0212206	0.418703
rs1264706	30171631	rs1264706	logistic	1	2	30171631	0.4076	0.0958631	0.366689	0.000564525	0.863888	0.00392214	0.0189488	0.446128
rs1264707	30171066	rs1264707	logistic	1	2	30171066	0.00971203	0.494791	0.00492849	0.902189	0.840888	0.053296	0.708221	0.0254752
rs1264708	30165133	rs1264708	logistic	1	2	30165133	0.00478936	0.887959	0.00235866	0.310149	0.941221	0.0258359	0.864982	0.0167229
rs1264709	30164455	rs1264709	logistic	1	2	30164455	9.2e-05	0.1534	0.00211824	8.17e-07	0.105141	0.467041	0.00265467	0.25746
rs1264714	30150188	rs1264714	logistic	1	2	30150188	8.45e-05	0.187131	0.00257643	1.55e-06	0.0823558	0.477232	0.00254951	0.26315
rs1264813	30047879	rs1264813	logistic	1	2	30047879	3.49e-06	0.0633374	0.00605672	0.0020797	1.63e-05	0.204671	0.34306	0.094862
rs1265045	31193319	rs1265045	logistic	1	2	31193319	0.706825	0.106242	0.807743	0.363182	0.699458	0.650751	0.027441	0.791714
rs1265048	31189388	rs1265048	logistic	1	2	31189388	2.48e-35	0.471148	4.12e-25	3.33e-11	8.05e-11	0.0224442	5.94e-13	0.579234
rs1265050	31188720	rs1265050	logistic	1	2	31188720	1.04e-13	0.115789	5.38e-10	6.97e-05	0.00394905	0.00331747	0.133231	0.772061
rs1265052	31188450	rs1265052	logistic	1	2	31188450	1.36e-14	0.137251	6.03e-11	4.42e-05	0.0113091	0.00542819	0.00425388	0.996917
rs1265061	31186236	rs1265061	logistic	1	2	31186236	2.99e-06	0.206576	2.35e-06	0.0288429	0.0298805	0.101122	0.00017048	0.611133
rs1265063	31185917	rs1265063	logistic	1	2	31185917	1.01e-11	0.135666	2.8e-08	0.000136196	0.0116611	0.00669514	0.0966035	0.887861
rs1265064	31185711	rs1265064	logistic	1	2	31185711	7.83e-12	0.135047	3.33e-08	0.000108	0.00953087	0.00668719	0.0965353	0.887671
rs1265070	31223186	rs1265070	logistic	1	2	31223186	0.160288	0.0483495	0.233035	0.293948	0.7608	0.76849	0.0200799	0.164314
rs1265078	31220581	rs1265078	logistic	1	2	31220581	0.00409031	0.186469	0.00749767	0.0368745	0.301081	0.884855	2.63e-06	0.186769
rs1265083	31219326	rs1265083	logistic	1	2	31219326	0.189204	0.583227	0.015865	0.844703	0.848663	0.684901	0.656104	0.204277
rs1265085	31218650	rs1265085	logistic	1	2	31218650	0.00196645	0.199609	0.228509	0.00518858	0.155957	0.384241	9.87e-10	0.733238
rs1265086	31217861	rs1265086	logistic	1	2	31217861	0.000251759	0.113907	0.000832069	0.0302539	0.165103	0.382032	4.11e-09	0.707521
rs1265087	31217789	rs1265087	logistic	1	2	31217789	0.00435735	0.188649	0.00801946	0.0417035	0.295477	0.890306	2.56e-06	0.188472
rs1265093	31215166	rs1265093	logistic	1	2	31215166	0.0209168	0.272918	0.621107	0.00164234	0.659644	0.0792182	7.89e-07	0.376993
rs1265095	31214622	rs1265095	logistic	1	2	31214622	0.122292	0.672618	0.404216	0.569829	0.792674	0.537711	9.21e-08	0.0188959
rs1265097	31214438	rs1265097	logistic	1	2	31214438	6.61e-05	0.506034	2.22e-07	7.79e-05	0.435673	0.672911	0.195146	0.136151
rs1265098	31214156	rs1265098	logistic	1	2	31214156	0.0564177	0.173079	0.107222	0.0289158	0.142446	0.120582	0.0161404	0.971563
rs1265099	31213392	rs1265099	logistic	1	2	31213392	0.00279561	0.923239	0.00305282	0.0235837	0.450311	0.074515	0.190201	0.642581
rs1265100	31213289	rs1265100	logistic	1	2	31213289	0.347502	0.261223	0.489172	0.1303	0.883718	0.693054	0.00682467	0.366496
rs1265109	31227568	rs1265109	logistic	1	2	31227568	0.00232923	0.0335785	0.0427226	0.00803458	0.142509	0.796899	3.63e-07	0.609227
rs1265110	31227401	rs1265110	logistic	1	2	31227401	0.124772	0.0450292	0.179337	0.313584	0.684057	0.841401	0.0145705	0.151764
rs1265112	31225998	rs1265112	logistic	1	2	31225998	0.00391084	0.187941	0.00729251	0.0363145	0.297023	0.887985	2.59e-06	0.187562
rs1265114	31225167	rs1265114	logistic	1	2	31225167	0.00399058	0.187296	0.00738273	0.0365624	0.298801	0.88663	2.61e-06	0.18717
rs1265115	31225054	rs1265115	logistic	1	2	31225054	0.962435	0.152736	0.386511	0.456919	0.717936	0.196536	5.24e-05	0.727347
rs1265155	31251673	rs1265155	logistic	1	2	31251673	3.89e-15	0.566018	1.57e-07	9.2e-06	3.43e-05	0.256844	7.13e-17	0.850729
rs1265156	31250276	rs1265156	logistic	1	2	31250276	1.46e-13	0.746619	1.23e-07	1.89e-06	0.00165918	0.65477	1.36e-17	0.977521
rs1265158	31248720	rs1265158	logistic	1	2	31248720	0.555084	0.27808	0.00979166	0.0112416	0.273215	0.918666	0.00764614	0.121659
rs1265159	31248026	rs1265159	logistic	1	2	31248026	2.04e-09	0.0805376	1.1e-11	1.7e-06	0.0986566	0.867632	1.92e-05	0.046768
rs1265161	31245639	rs1265161	logistic	1	2	31245639	0.337516	0.963358	0.0706065	0.864553	0.988597	0.82452	0.73211	0.161074
rs1265163	31242066	rs1265163	logistic	1	2	31242066	0.140848	0.0462916	0.204124	0.30597	0.701663	0.832958	0.0147792	0.152812
rs1265178	31269208	rs1265178	logistic	1	2	31269208	3.82e-09	0.0544533	1.2e-10	4.43e-07	0.0800769	0.95579	1.68e-05	0.00806301
rs1265180	31267324	rs1265180	logistic	1	2	31267324	0.27176	0.815711	0.0711651	0.923059	0.971453	0.843173	0.724543	0.158524
rs1265181	31263764	rs1265181	logistic	1	2	31263764	4.05e-09	0.0540357	1.25e-10	4.5e-07	0.0811802	0.952057	1.69e-05	0.00803859
rs1265754	32411670	rs1265754	logistic	1	2	32411670	0.124672	0.185169	0.713177	0.0252247	0.630673	0.556511	0.00703279	0.371089
rs1265757	32410360	rs1265757	logistic	1	2	32410360	0.124672	0.185169	0.713177	0.0252247	0.630673	0.556511	0.00703279	0.371089
rs1265758	32431507	rs1265758	logistic	1	2	32431507	0.869896	0.254853	0.0943094	0.0936478	0.779473	0.000529512	0.167562	0.677956
rs1265759	32430371	rs1265759	logistic	1	2	32430371	0.508684	0.194883	0.272648	0.211879	0.928571	0.000105826	0.149338	0.55811
rs1265761	32429575	rs1265761	logistic	1	2	32429575	0.0175121	0.520085	0.198919	0.00503526	0.798093	0.3488	0.0439248	0.740538
rs1265762	32429093	rs1265762	logistic	1	2	32429093	0.487125	0.191278	0.282122	0.216895	0.912435	0.000101434	0.147099	0.553778
rs12660382	31551302	rs12660382	logistic	1	2	31551302	0.329904	0.309402	0.0885505	0.883096	0.259116	0.146996	0.00295155	0.625394
rs12660700	31551717	rs12660700	logistic	1	2	31551717	0.00265771	0.812959	0.000247229	0.0416787	0.141281	0.166317	0.246383	0.0782253
rs1266071	31777475	rs1266071	logistic	1	2	31777475	0.294604	0.482241	0.0412968	0.688475	0.053463	0.00549644	0.0898226	0.347673
rs12660712	29842613	rs12660712	logistic	1	2	29842613	2.26e-07	0.803009	9.55e-07	0.00603865	0.0228686	0.946568	0.21568	0.323274
rs12660719	32683961	rs12660719	logistic	1	2	32683961	0.00360161	0.815099	0.79863	0.0683336	0.00814656	0.000950753	0.51979	0.50858
rs1266074	31774530	rs1266074	logistic	1	2	31774530	2.75e-06	0.593458	0.0007147	0.00811962	0.229698	0.0146897	0.0113029	0.0151002
rs12660769	32380288	rs12660769	logistic	1	2	32380288	1.25e-07	0.59817	0.00312263	0.000577046	0.000215555	0.0448863	0.520076	0.283185
rs12660817	31444736	rs12660817	logistic	1	2	31444736	6.18e-07	0.196787	3.45e-06	0.000712293	0.000118012	0.650896	0.0131292	0.454828
rs12660860	30872220	rs12660860	logistic	1	2	30872220	0.730316	0.761594	0.482631	0.285969	0.711844	0.0647278	0.79479	0.460716
rs12660883	30872399	rs12660883	logistic	1	2	30872399	0.84775	0.850488	0.485519	0.204321	0.669875	0.0950859	0.74042	0.593316
rs12661053	30086006	rs12661053	logistic	1	2	30086006	6.27e-05	0.295433	6.73e-06	0.031366	0.0205755	0.0859218	0.457621	0.200204
rs12661281	31950577	rs12661281	logistic	1	2	31950577	2.02e-20	0.135018	1.3e-12	1.17e-08	1.17e-07	0.0266107	0.819466	0.268621
rs12661411	30062178	rs12661411	logistic	1	2	30062178	6.39e-05	0.288237	5.54e-06	0.0327879	0.0221843	0.083593	0.460721	0.201202
rs12661731	30170324	rs12661731	logistic	1	2	30170324	1.95e-11	0.127355	5.38e-07	2.38e-07	6.33e-05	0.225887	0.186544	0.650392
rs12662077	33009979	rs12662077	logistic	1	2	33009979	0.740529	0.539701	0.298556	0.197316	0.627669	0.000177765	0.431966	0.998878
rs12662501	31298829	rs12662501	logistic	1	2	31298829	1.57e-17	0.760784	2.95e-14	1.68e-07	0.00332172	0.928342	4.59e-15	0.403554
rs12662503	32426622	rs12662503	logistic	1	2	32426622	5.89e-08	0.37846	1.39e-07	0.000232824	0.0462892	0.553534	0.138238	0.646756
rs12662947	30062090	rs12662947	logistic	1	2	30062090	6.07e-05	0.290124	5.36e-06	0.0323954	0.0217638	0.0842775	0.459177	0.200524
rs12662967	30062259	rs12662967	logistic	1	2	30062259	5.15e-05	0.297103	4.84e-06	0.0311804	0.0204804	0.0868458	0.454574	0.198792
rs12663103	32269302	rs12663103	logistic	1	2	32269302	5.3e-12	0.943135	3.98e-06	0.000609063	0.000112601	0.000665442	0.0299066	0.965361
rs12663108	31377534	rs12663108	logistic	1	2	31377534	0.849262	0.194016	0.0664785	0.883775	0.0648036	0.718092	0.766702	0.235774
rs12663184	30409579	rs12663184	logistic	1	2	30409579	0.130856	0.693016	0.0237493	0.110162	0.203185	0.0194439	0.552908	0.452069
rs12663317	32850805	rs12663317	logistic	1	2	32850805	1.26e-07	0.239873	7.15e-07	6.94e-06	0.00951268	0.0171267	0.810162	0.917688
rs12663603	29782408	rs12663603	logistic	1	2	29782408	0.00195418	0.785666	0.00102891	0.034184	0.320587	0.738009	0.363708	0.776156
rs12663724	30167595	rs12663724	logistic	1	2	30167595	3.73e-12	0.402894	4.76e-07	6.39e-07	1.64e-05	0.399489	0.164592	0.830671
rs12664166	30065264	rs12664166	logistic	1	2	30065264	5.24e-05	0.296153	4.89e-06	0.0313582	0.0206024	0.0864827	0.455387	0.199093
rs12664384	31380871	rs12664384	logistic	1	2	31380871	0.848551	0.185962	0.0729344	0.90558	0.0604755	0.698258	0.521746	0.239228
rs12664794	30117643	rs12664794	logistic	1	2	30117643	5.88e-05	0.297915	6.44e-06	0.0309094	0.0200619	0.0868885	0.455892	0.199568
rs12664967	30076159	rs12664967	logistic	1	2	30076159	7.64e-05	0.287688	7.85e-06	0.0331174	0.0224948	0.0837363	0.460582	0.201315
rs12665339	30709211	rs12665339	logistic	1	2	30709211	9.74e-16	0.805505	1.17e-11	9.69e-05	1.69e-05	0.57579	1.22e-08	0.789873
rs12665489	31615966	rs12665489	logistic	1	2	31615966	0.0931856	0.0332395	0.0315649	0.0545678	0.708712	0.268534	0.193104	0.569809
rs1268444	30519525	rs1268444	logistic	1	2	30519525	0.11684	0.126883	0.436618	0.587473	0.821143	0.0195071	0.409749	0.469611
rs1268447	30387038	rs1268447	logistic	1	2	30387038	7.12e-07	0.852932	5.63e-08	6.76e-06	0.118756	0.755775	0.30256	0.361602
rs1269556	30516766	rs1269556	logistic	1	2	30516766	0.00322625	0.431903	0.000706009	0.54428	0.0825092	0.667527	0.0812109	0.667915
rs1269851	32200185	rs1269851	logistic	1	2	32200185	3.43e-24	0.094845	5.68e-14	0.000316264	1.59e-08	0.000226613	0.999842	0.0236586
rs1269852	32188169	rs1269852	logistic	1	2	32188169	0.44157	0.0479703	0.578401	0.0357119	0.95974	0.456075	0.0044342	0.842382
rs1269854	32178816	rs1269854	logistic	1	2	32178816	2.52e-24	0.205598	2.68e-14	0.000133041	1.16e-08	0.000452399	0.775066	0.0307697
rs1270942	32026839	rs1270942	logistic	1	2	32026839	0.532821	0.0226156	0.486232	0.0472437	0.988307	0.204223	0.0023759	0.699405
rs129653	33039514	rs129653	logistic	1	2	33039514	1.13e-15	0.0724317	2.15e-05	6.19e-05	1.98e-07	0.0156102	0.00645066	0.00162664
rs130066	31230294	rs130066	logistic	1	2	31230294	0.00474087	0.680601	3.17e-07	0.0549517	0.771459	0.469364	0.173643	0.16074
rs130067	31226490	rs130067	logistic	1	2	31226490	0.00211536	0.196921	0.250279	0.00436943	0.160894	0.389266	1.05e-09	0.729538
rs130071	31224189	rs130071	logistic	1	2	31224189	0.0974904	0.0621783	0.146893	0.070543	0.618092	0.643464	7.53e-06	0.441098
rs130072	31220463	rs130072	logistic	1	2	31220463	1.09e-06	0.786038	7.15e-11	3.89e-05	0.401355	0.809687	0.151488	0.383759
rs130073	31219159	rs130073	logistic	1	2	31219159	0.203363	0.544429	0.0089631	0.917799	0.78574	0.082983	0.308206	0.912833
rs130075	31230481	rs130075	logistic	1	2	31230481	0.000209608	0.311575	0.00193535	0.641672	0.349235	0.0968786	8.26e-17	0.272834
rs130076	31230461	rs130076	logistic	1	2	31230461	1.8e-09	0.0643537	7.09e-11	4.85e-07	0.0789743	0.918349	2.96e-05	0.0159235
rs130077	31230309	rs130077	logistic	1	2	31230309	0.963526	0.194472	0.676804	0.360799	0.935686	0.163112	0.0428197	0.278008
rs130078	31226544	rs130078	logistic	1	2	31226544	0.979276	0.816372	0.242554	0.173952	0.850543	0.0851167	0.124408	0.913824
rs130079	31220716	rs130079	logistic	1	2	31220716	2.5e-10	0.110348	8.27e-13	1.1e-06	0.0949098	0.998888	2.37e-05	0.0500883
rs13118	31935265	rs13118	logistic	1	2	31935265	1.96e-06	0.0648746	4.75e-05	0.111482	0.00255519	0.62103	0.340587	0.387878
rs1318638	30235852	rs1318638	logistic	1	2	30235852	1.39e-08	0.119064	1.16e-09	0.00304426	0.0881541	0.0929895	0.989153	0.476341
rs13191099	31348981	rs13191099	logistic	1	2	31348981	3.49e-11	0.618364	2.59e-09	0.00452062	0.00298865	0.00133728	0.000280331	0.01279
rs13191258	31086696	rs13191258	logistic	1	2	31086696	6.08e-08	0.240982	8.4e-06	0.000370082	0.0356679	0.00128418	0.022997	0.0762367
rs13191728	30881328	rs13191728	logistic	1	2	30881328	0.322635	0.434363	0.681478	0.326205	0.329535	0.156394	0.649226	0.442602
rs13192471	32779081	rs13192471	logistic	1	2	32779081	6.67e-94	0.128908	4.69e-67	2.48e-38	1.83e-32	0.0542318	2.98e-09	0.0142006
rs13193645	32704302	rs13193645	logistic	1	2	32704302	5.48e-05	0.0539799	0.582252	0.0367234	5.59e-06	0.158585	0.000122281	0.0890503
rs13195066	30668775	rs13195066	logistic	1	2	30668775	0.000102968	0.928362	0.0181177	0.00029479	0.118062	0.00886069	0.904951	0.742183
rs13195441	32851276	rs13195441	logistic	1	2	32851276	1.89e-14	0.117986	2.29e-07	0.00021602	8.75e-09	0.0294676	0.036113	0.0183569
rs13195715	31408673	rs13195715	logistic	1	2	31408673	0.448444	0.887496	0.251403	0.137088	0.786515	0.0169307	0.000467105	0.00427584
rs13196329	32433349	rs13196329	logistic	1	2	32433349	3.68e-05	0.357777	2.07e-05	0.00996453	0.0878551	0.00804479	0.123769	0.203804
rs13199524	32174743	rs13199524	logistic	1	2	32174743	5.5e-25	0.344156	9.58e-16	7.11e-07	1.31e-08	0.0148359	0.0026373	0.421978
rs13200022	31206936	rs13200022	logistic	1	2	31206936	2.62e-14	0.33379	4.46e-13	2.27e-06	0.0162953	0.00480513	0.00584402	0.135414
rs13200073	31378987	rs13200073	logistic	1	2	31378987	4.31e-11	0.921617	2.41e-09	0.0127048	0.00622951	0.000677253	0.00117718	0.0405334
rs13200483	31024238	rs13200483	logistic	1	2	31024238	4.99e-06	0.496648	0.000305197	0.00240677	0.0814033	0.0213168	0.0210991	0.227891
rs13201129	30709046	rs13201129	logistic	1	2	30709046	1.56e-05	0.853458	0.00299456	0.000966546	0.0422329	0.0107262	0.562509	0.391216
rs13201757	31195039	rs13201757	logistic	1	2	31195039	3.09e-12	0.693955	2.62e-10	1.87e-05	0.0206758	3.2e-05	0.135182	0.00564076
rs13203101	31262341	rs13203101	logistic	1	2	31262341	1.07e-08	0.0887277	1.09e-08	0.000373359	0.0754839	0.00125146	0.0548349	0.057124
rs13203429	32852830	rs13203429	logistic	1	2	32852830	1.25e-21	0.259356	3.55e-13	1.66e-08	1.61e-10	0.480342	0.0994692	0.0321882
rs13203651	33096271	rs13203651	logistic	1	2	33096271	0.00779777	0.110581	0.330822	0.260207	0.000547493	0.125037	0.544766	0.960661
rs13203715	33096566	rs13203715	logistic	1	2	33096566	0.00792834	0.143054	0.0525733	0.139166	0.0466418	0.146216	0.290664	0.725776
rs13203895	31352061	rs13203895	logistic	1	2	31352061	9.4e-10	0.901179	2.54e-08	0.0182824	0.0139481	0.00084217	0.000902729	0.0257473
rs13204228	30842234	rs13204228	logistic	1	2	30842234	0.00186974	0.881619	0.000624251	0.0260194	0.0404552	0.0421522	0.825669	0.966237
rs13204986	31208254	rs13204986	logistic	1	2	31208254	3.29e-13	0.564122	3.4e-11	0.000157522	0.00321802	8.03e-05	0.0482878	0.00581483
rs13205699	33112265	rs13205699	logistic	1	2	33112265	0.0109969	0.277042	0.756059	0.274498	0.00046402	0.177691	0.319502	0.523451
rs13205975	33078843	rs13205975	logistic	1	2	33078843	3.97e-06	0.58701	0.0705586	0.00756328	5.64e-06	0.123037	0.0893177	0.962688
rs13207475	33087856	rs13207475	logistic	1	2	33087856	0.00803434	0.0881407	0.341887	0.25119	0.000486628	0.120708	0.535717	0.952519
rs13207945	32687686	rs13207945	logistic	1	2	32687686	9.18e-13	0.00548801	1.34e-08	0.0155667	1.57e-09	0.0138644	0.171612	0.69354
rs13208583	32908849	rs13208583	logistic	1	2	32908849	2.98e-05	0.187069	0.00040573	0.00380619	0.00407846	0.0360165	0.972321	0.568237
rs13209234	32523953	rs13209234	logistic	1	2	32523953	0.200445	0.028828	0.0439678	0.618257	0.837205	0.686761	0.00272297	0.38974
rs13210132	31109122	rs13210132	logistic	1	2	31109122	1.88e-08	0.211882	1.08e-06	0.000713694	0.0276609	0.000902233	0.0252151	0.0684315
rs13211318	32210658	rs13211318	logistic	1	2	32210658	9.57e-34	0.105625	2.1e-20	4.71e-09	4.3e-12	0.0112226	0.00254944	0.231644
rs13212987	31114755	rs13212987	logistic	1	2	31114755	0.000836981	0.854414	0.00071171	0.229863	0.0585008	0.475803	0.409791	0.0104219
rs13213365	30249183	rs13213365	logistic	1	2	30249183	5.47e-14	0.564129	9.34e-14	1.91e-06	0.000274936	0.422599	0.890299	0.665165
rs13214608	30176592	rs13214608	logistic	1	2	30176592	1.66e-07	0.971778	6.55e-05	0.0105791	9.56e-05	0.095376	0.543474	0.110336
rs13214831	30839484	rs13214831	logistic	1	2	30839484	0.751663	0.887118	0.445753	0.201381	0.805063	0.0782269	0.830702	0.561849
rs13215307	30259933	rs13215307	logistic	1	2	30259933	4.13e-14	0.543053	4.47e-14	2.37e-06	0.000530616	0.321235	0.90749	0.800512
rs13215763	33104578	rs13215763	logistic	1	2	33104578	0.0214306	0.16758	0.912916	0.363839	0.000367571	0.186577	0.359229	0.562395
rs13216197	31378997	rs13216197	logistic	1	2	31378997	5.62e-11	0.921206	2.83e-09	0.0133374	0.00706023	0.000675954	0.00117754	0.0405546
rs13218306	31348911	rs13218306	logistic	1	2	31348911	3.18e-11	0.609477	2.76e-09	0.003589	0.00312938	0.00127398	0.000290957	0.0125955
rs13295	31752619	rs13295	logistic	1	2	31752619	0.138516	0.500737	0.414868	0.129928	0.0102834	0.539367	0.454974	0.023488
rs13409	31240119	rs13409	logistic	1	2	31240119	0.00686028	0.649872	7.97e-07	0.0668633	0.7546	0.497174	0.160501	0.175574
rs13437000	33213042	rs13437000	logistic	1	2	33213042	0.0142253	0.376592	0.114474	0.0314174	0.113257	0.0920492	0.296873	0.0536365
rs13437082	31462539	rs13437082	logistic	1	2	31462539	1.4e-19	0.626745	3.34e-12	1.55e-05	0.000477963	0.0672711	3.08e-38	0.0375355
rs13437088	31463098	rs13437088	logistic	1	2	31463098	1.17e-19	0.626745	3.34e-12	1.55e-05	0.000477963	0.0816322	3.08e-38	0.0375355
rs1345229	30290374	rs1345229	logistic	1	2	30290374	0.00368318	0.70354	0.0120757	0.127412	0.733592	0.00255936	0.971777	0.314245
rs1362068	29850087	rs1362068	logistic	1	2	29850087	1.83e-12	0.129394	8.95e-08	8.93e-10	5.18e-05	0.946786	0.0330664	0.272756
rs1362070	29850278	rs1362070	logistic	1	2	29850278	1.83e-12	0.129394	8.95e-08	8.93e-10	5.18e-05	0.946786	0.0330664	0.272756
rs1362087	30317956	rs1362087	logistic	1	2	30317956	0.51388	0.015053	0.890264	0.0621649	0.482467	0.26366	0.000113884	0.545181
rs1362088	30317815	rs1362088	logistic	1	2	30317815	0.628495	0.0151041	0.771994	0.0600884	0.395616	0.263598	0.000120729	0.541154
rs1362089	30317781	rs1362089	logistic	1	2	30317781	7.47e-07	0.650679	0.000273377	0.00090504	0.102935	0.000126173	0.259824	0.264753
rs1362104	30209635	rs1362104	logistic	1	2	30209635	0.93658	0.0679783	0.225929	0.0395215	0.052053	0.661867	0.882453	0.499865
rs1362114	30522898	rs1362114	logistic	1	2	30522898	0.0251292	0.81162	0.000326734	0.728524	0.0241106	0.0315082	0.588496	0.630748
rs1362115	30522827	rs1362115	logistic	1	2	30522827	0.0162098	0.422779	0.000111748	0.742699	0.0270838	0.0285741	0.355098	0.989144
rs1362116	30481022	rs1362116	logistic	1	2	30481022	1.28e-19	0.476253	2e-13	3e-05	4.19e-08	0.249819	2.39e-05	0.901489
rs1362117	30475161	rs1362117	logistic	1	2	30475161	2.8e-16	0.972858	2.59e-09	8.54e-07	7.32e-05	0.00496176	0.000112507	0.358542
rs1362119	30607711	rs1362119	logistic	1	2	30607711	0.339837	0.393747	0.949504	0.596018	0.266386	0.431896	0.0351201	0.0424768
rs1362126	29798998	rs1362126	logistic	1	2	29798998	4.39e-26	0.536297	9.48e-19	2.63e-14	3.18e-06	0.0184916	0.00302725	0.350419
rs1367727	33042387	rs1367727	logistic	1	2	33042387	0.294775	0.0860491	0.651233	0.290665	0.795274	1.68e-06	0.657347	0.234872
rs1367728	33142793	rs1367728	logistic	1	2	33142793	0.578567	0.786057	0.870243	0.29009	0.98366	0.000102041	0.211192	0.154577
rs1367730	33166092	rs1367730	logistic	1	2	33166092	1.24e-07	0.00943528	2.23e-13	5.12e-05	0.179501	0.000409833	0.0282434	0.585797
rs1367731	33093177	rs1367731	logistic	1	2	33093177	0.401131	0.977757	0.0628221	0.32203	0.696179	0.0295926	0.837824	0.156627
rs1383261	32873429	rs1383261	logistic	1	2	32873429	1.74e-12	0.162523	2.53e-09	0.0110178	1.08e-06	0.560999	0.32405	0.198437
rs1383264	32847945	rs1383264	logistic	1	2	32847945	1.86e-81	0.318664	3.4e-48	1.13e-25	1.35e-36	0.233217	0.0385734	0.00073288
rs1383265	32847866	rs1383265	logistic	1	2	32847866	1.48e-12	0.490502	4.81e-09	1.75e-05	1.75e-06	0.494048	0.47628	0.5995
rs1383266	32942710	rs1383266	logistic	1	2	32942710	2.59e-05	0.719312	0.0840588	0.00379593	0.000241646	0.487366	0.473637	0.0104594
rs1383267	32941624	rs1383267	logistic	1	2	32941624	2.46e-12	0.0227125	3.17e-11	0.00780618	0.000898112	0.32851	0.319642	0.21274
rs14004	32515687	rs14004	logistic	1	2	32515687	0.975648	0.164919	0.000183824	0.0380104	0.391422	1.67e-12	0.912738	0.0882959
rs1419651	30453407	rs1419651	logistic	1	2	30453407	0.297307	0.56661	0.693819	0.0704434	0.785228	0.0246133	0.572065	0.51849
rs1419652	30453331	rs1419652	logistic	1	2	30453331	0.537953	0.211252	0.221463	0.895267	0.33741	0.0011804	0.148768	0.622644
rs1419653	30453118	rs1419653	logistic	1	2	30453118	0.537953	0.211252	0.221463	0.895267	0.33741	0.0011804	0.148768	0.622644
rs1419671	30205149	rs1419671	logistic	1	2	30205149	3.68e-24	0.425942	2.47e-18	7.06e-14	0.000271017	0.0138966	2.67e-05	0.251657
rs1419672	30204751	rs1419672	logistic	1	2	30204751	5.48e-23	0.435909	7.05e-18	5.57e-13	0.000521869	0.0134079	1.04e-05	0.246752
rs1419673	30204696	rs1419673	logistic	1	2	30204696	3.68e-24	0.425942	2.47e-18	7.06e-14	0.000271017	0.0138966	2.67e-05	0.251657
rs1419674	30200914	rs1419674	logistic	1	2	30200914	5.5e-19	0.0322084	1.9e-09	0.000784797	5.35e-07	0.0157282	0.0236064	0.195229
rs1419675	30200686	rs1419675	logistic	1	2	30200686	3.07e-36	0.107862	2.21e-22	3.39e-11	1.16e-09	0.00151843	4.37e-05	0.434386
rs1419687	30523090	rs1419687	logistic	1	2	30523090	0.114205	0.11139	0.409439	0.607182	0.835978	0.0199843	0.439527	0.456069
rs1419688	30522928	rs1419688	logistic	1	2	30522928	0.0228778	0.822056	0.000301065	0.741762	0.0227389	0.0325932	0.593359	0.634548
rs1419689	30478567	rs1419689	logistic	1	2	30478567	3.2e-09	0.543477	0.000487146	0.000181738	0.00393409	0.0142771	0.000125663	0.542541
rs1419881	31238572	rs1419881	logistic	1	2	31238572	0.00112468	0.816006	4.47e-07	0.00973412	0.814393	0.712862	0.141927	0.255043
rs1426713	32306027	rs1426713	logistic	1	2	32306027	5.23e-13	0.792579	2.43e-08	1.82e-06	8.78e-06	0.748934	0.0528255	0.472114
rs1431393	33031966	rs1431393	logistic	1	2	33031966	0.299724	0.08546	0.6563	0.288552	0.800616	1.7e-06	0.65858	0.235464
rs1431394	33031971	rs1431394	logistic	1	2	33031971	0.299724	0.08546	0.6563	0.288552	0.800616	1.7e-06	0.65858	0.235464
rs1431403	33155009	rs1431403	logistic	1	2	33155009	5.08e-11	0.0461603	1.57e-16	0.000198863	0.742106	1.42e-06	0.109049	0.436425
rs14365	31743689	rs14365	logistic	1	2	31743689	1.8e-07	0.194165	6.2e-05	1.95e-05	0.0416687	0.0791615	0.012752	0.895611
rs1465651	33009329	rs1465651	logistic	1	2	33009329	0.00319862	0.847887	0.0143311	0.542569	0.0854154	0.197472	0.803075	0.95327
rs1468079	30614362	rs1468079	logistic	1	2	30614362	0.662558	0.372615	0.669535	0.698149	0.636674	0.311383	0.0364756	0.0639872
rs1473102	30393384	rs1473102	logistic	1	2	30393384	0.00889312	0.431971	0.102938	0.113811	0.0216921	0.330049	0.286491	0.230268
rs1474728	32410045	rs1474728	logistic	1	2	32410045	0.00556551	0.268372	0.917303	0.811957	0.676908	1.42e-10	0.000161251	0.51276
rs1474729	32410023	rs1474729	logistic	1	2	32410023	0.00548882	0.265736	0.927398	0.805283	0.694665	1.35e-10	0.000157012	0.509521
rs1475865	31765392	rs1475865	logistic	1	2	31765392	6.27e-28	0.0146994	1.41e-13	3.74e-06	2.95e-09	1.81e-06	0.0125237	0.130905
rs1475961	32302587	rs1475961	logistic	1	2	32302587	6.95e-08	0.879176	0.0018297	0.000150002	0.00669602	0.00101339	0.000592782	0.189285
rs1476572	29782720	rs1476572	logistic	1	2	29782720	3.21e-21	0.245885	2.15e-18	2.56e-07	0.000135632	0.00281536	0.334389	0.773189
rs1476573	29782627	rs1476573	logistic	1	2	29782627	3.21e-21	0.245885	2.15e-18	2.56e-07	0.000135632	0.00281536	0.334389	0.773189
rs1480380	33021224	rs1480380	logistic	1	2	33021224	1.39e-11	0.311068	0.00177729	1.37e-05	4.49e-06	0.0401507	0.00454147	0.638414
rs1480383	32848834	rs1480383	logistic	1	2	32848834	9.63e-23	0.0109201	1.86e-16	5.61e-06	8.7e-11	0.693876	0.205394	0.0567708
rs149392	32997949	rs149392	logistic	1	2	32997949	6.64e-13	0.584078	4.94e-11	0.000653603	0.000368686	0.0859664	0.316955	0.206706
rs150359	33030046	rs150359	logistic	1	2	33030046	6.44e-06	0.0120537	0.00293126	0.047294	0.0187797	0.43128	0.22986	0.150559
rs151719	33011878	rs151719	logistic	1	2	33011878	3.14e-07	0.977373	0.00470064	0.0213088	0.00355384	0.00579306	0.0473242	0.00341832
rs151723	33003337	rs151723	logistic	1	2	33003337	8.65e-10	0.654293	4.77e-06	5.52e-05	0.00013907	0.882508	0.733582	0.852324
rs151724	33000666	rs151724	logistic	1	2	33000666	9.08e-10	0.656923	4.89e-06	5.6e-05	0.000142608	0.8841	0.733576	0.8526
rs1541267	30211550	rs1541267	logistic	1	2	30211550	3.31e-20	0.326783	2.84e-15	9.89e-12	0.000617811	0.0342408	1.32e-05	0.33932
rs1541268	30211373	rs1541268	logistic	1	2	30211373	2.25e-23	0.255125	2.05e-18	6.66e-13	0.000205815	0.0220241	2.43e-05	0.219117
rs1541269	30211339	rs1541269	logistic	1	2	30211339	0.252235	0.053915	0.0747344	0.00083631	0.611516	0.00285399	0.328048	0.890044
rs1541324	30221450	rs1541324	logistic	1	2	30221450	8.24e-21	0.398018	3.73e-15	1.85e-12	0.000625514	0.0255425	1.16e-05	0.366275
rs1548513	30495666	rs1548513	logistic	1	2	30495666	0.0232809	0.819926	0.000303868	0.73861	0.0229505	0.0323835	0.592478	0.633571
rs1548514	30495447	rs1548514	logistic	1	2	30495447	0.0251434	0.811618	0.000327021	0.728503	0.0241032	0.031467	0.587922	0.630285
rs1548515	30495382	rs1548515	logistic	1	2	30495382	0.0257376	0.801911	0.000358907	0.717516	0.0225731	0.0300906	0.579231	0.625525
rs154973	33008620	rs154973	logistic	1	2	33008620	0.983338	0.448464	0.639685	0.365656	0.910113	0.0279116	0.162971	0.846002
rs154977	33007996	rs154977	logistic	1	2	33007996	7.9e-25	0.028673	1.01e-13	2.98e-06	8.59e-09	0.000101427	0.387414	0.00608084
rs154978	33007274	rs154978	logistic	1	2	33007274	8.96e-10	0.190851	8.26e-09	0.0391837	0.00149445	0.183604	0.728991	0.374704
rs154980	32990777	rs154980	logistic	1	2	32990777	3.44e-13	0.585047	5.03e-11	0.000659215	0.000176233	0.0861715	0.317291	0.206861
rs154982	32988523	rs154982	logistic	1	2	32988523	4.74e-13	0.590525	5.62e-11	0.000684056	0.000233195	0.0879807	0.32032	0.208204
rs154983	32988423	rs154983	logistic	1	2	32988423	3.73e-13	0.582601	4.78e-11	0.000647374	0.000213434	0.0855971	0.316347	0.206282
rs154984	32988397	rs154984	logistic	1	2	32988397	4.63e-13	0.504043	9.75e-11	0.000340491	0.000212637	0.114263	0.360612	0.232791
rs154986	32987211	rs154986	logistic	1	2	32987211	4.11e-13	0.582601	6.14e-11	0.000647374	0.000213434	0.0855971	0.316347	0.206282
rs154989	32985151	rs154989	logistic	1	2	32985151	6.16e-13	0.0637724	1.06e-11	0.00922591	0.000811056	0.079799	0.930443	0.647228
rs1555115	32462498	rs1555115	logistic	1	2	32462498	1.11e-16	0.339828	3.75e-10	2.03e-07	1.89e-08	0.88373	0.000101109	0.692288
rs15574	31794476	rs15574	logistic	1	2	31794476	7.48e-16	0.318991	4.4e-13	2.88e-06	0.00118402	0.462005	0.000495232	0.00496562
rs1557607	30226616	rs1557607	logistic	1	2	30226616	4.72e-23	0.38148	9.35e-18	1.11e-13	0.000374779	0.0370284	4.26e-05	0.24876
rs1557608	30226561	rs1557608	logistic	1	2	30226561	1.6e-17	0.293064	1.53e-11	1.02e-10	0.00101909	0.028627	5.91e-06	0.105059
rs1557609	30226468	rs1557609	logistic	1	2	30226468	2.39e-20	0.391726	8.41e-15	2.09e-12	0.000792128	0.0323721	1.22e-05	0.369516
rs1557611	30226339	rs1557611	logistic	1	2	30226339	4.16e-23	0.361179	1.45e-17	1.07e-13	0.000369417	0.0258683	2.92e-05	0.259273
rs1559873	32351107	rs1559873	logistic	1	2	32351107	2.15e-31	0.226883	1.29e-32	1.59e-13	2.94e-10	0.0203271	0.358555	0.241076
rs1559874	32351133	rs1559874	logistic	1	2	32351133	1.3e-31	0.1939	4.77e-33	1.89e-13	3.02e-10	0.016413	0.371464	0.237581
rs1559876	32323747	rs1559876	logistic	1	2	32323747	0.00106076	0.196968	0.40812	0.33732	0.519428	4.43e-06	2.63e-05	0.795747
rs1573293	30494493	rs1573293	logistic	1	2	30494493	0.0229134	0.82895	0.000347932	0.750344	0.021835	0.0334899	0.598356	0.638528
rs1573294	30494394	rs1573294	logistic	1	2	30494394	0.024759	0.812698	0.00027247	0.729932	0.0270084	0.0315991	0.589142	0.631437
rs1573295	30307046	rs1573295	logistic	1	2	30307046	7.2e-06	0.708387	0.000478908	0.0015714	0.349549	0.000223573	0.3025	0.129701
rs1573296	30235784	rs1573296	logistic	1	2	30235784	0.215808	0.170079	0.208433	0.00295616	0.667926	0.0125399	0.00761459	0.547049
rs1573298	30224139	rs1573298	logistic	1	2	30224139	5.1e-20	0.326139	5.35e-15	1.01e-11	0.000626379	0.0346069	1.34e-05	0.339638
rs1573299	30223944	rs1573299	logistic	1	2	30223944	2.73e-23	0.361179	1.04e-17	1.07e-13	0.000315213	0.0258683	2.92e-05	0.259273
rs1573646	32839602	rs1573646	logistic	1	2	32839602	2.45e-29	0.175688	2.34e-17	5.65e-08	5.47e-14	0.0847769	0.148564	0.0161032
rs1573649	32839236	rs1573649	logistic	1	2	32839236	4.69e-31	0.134159	3.38e-18	3.34e-08	7.74e-15	0.0672069	0.126064	0.0134202
rs1576	31218370	rs1576	logistic	1	2	31218370	0.00419005	0.189905	0.00783075	0.0411885	0.292041	0.893037	2.53e-06	0.189184
rs1579219	30332284	rs1579219	logistic	1	2	30332284	0.103707	0.238805	0.250222	0.854244	0.448948	0.621337	0.00617184	0.907352
rs1579220	30332217	rs1579220	logistic	1	2	30332217	7.1e-18	0.0993784	5.22e-09	0.000663397	1.02e-06	0.0149185	0.0310465	0.157881
rs1580345	32945674	rs1580345	logistic	1	2	32945674	2.14e-10	0.0527542	3.77e-10	0.0192119	0.000673452	0.995452	0.364667	0.543988
rs1585891	32844700	rs1585891	logistic	1	2	32844700	4.08e-62	0.0420656	1.72e-38	2.74e-15	6.5e-27	0.00481684	0.212221	0.000939641
rs1585894	32983301	rs1585894	logistic	1	2	32983301	4.13e-13	0.501201	9.02e-11	0.000330582	0.000204223	0.113282	0.359277	0.231928
rs15912	33052072	rs15912	logistic	1	2	33052072	0.271478	0.113244	0.641686	0.293982	0.786737	1.6e-06	0.651662	0.23234
rs1592414	30475573	rs1592414	logistic	1	2	30475573	2.93e-16	0.947593	2.74e-09	9.16e-07	7.47e-05	0.00417739	0.000121034	0.363938
rs1592415	30485885	rs1592415	logistic	1	2	30485885	6.51e-18	0.779558	3.07e-13	4.77e-06	3.96e-06	0.211081	1.99e-06	0.923799
rs1610594	29787026	rs1610594	logistic	1	2	29787026	3.5e-21	0.249885	3.43e-18	1.97e-07	0.000171296	0.00218617	0.337662	0.667595
rs1610597	29789679	rs1610597	logistic	1	2	29789679	3.26e-12	0.290918	4.87e-11	0.000549311	0.00745976	0.00802259	0.287081	0.728491
rs1610601	29808162	rs1610601	logistic	1	2	29808162	0.351913	0.0240946	0.46754	0.0264898	0.542427	0.14899	0.00304832	0.629339
rs1610602	29810040	rs1610602	logistic	1	2	29810040	0.928603	0.0599051	0.689195	0.0426078	0.868542	0.30815	0.12674	0.894257
rs1610603	29816201	rs1610603	logistic	1	2	29816201	4.14e-13	0.25386	4.36e-08	0.000116667	0.000502195	0.00836904	0.081138	0.46034
rs1610613	29818942	rs1610613	logistic	1	2	29818942	4.14e-13	0.25386	4.36e-08	0.000116667	0.000502195	0.00836904	0.081138	0.46034
rs1610628	29836188	rs1610628	logistic	1	2	29836188	8.8e-13	0.293626	8.42e-08	0.000114472	0.000575304	0.00830508	0.0807624	0.458984
rs1610647	29870047	rs1610647	logistic	1	2	29870047	2.1e-12	0.131598	9.28e-08	1.15e-09	5.53e-05	0.939077	0.0323163	0.269309
rs1610649	29876896	rs1610649	logistic	1	2	29876896	3.33e-17	0.424632	1.59e-10	8.3e-12	4.91e-06	0.651886	0.0364696	0.281254
rs1610663	29886605	rs1610663	logistic	1	2	29886605	1.51e-10	0.186333	3.2e-07	1.63e-08	0.000497893	0.676803	0.018974	0.39867
rs1610677	29897150	rs1610677	logistic	1	2	29897150	4.4e-09	0.280456	1.94e-06	8.31e-08	0.0341658	0.142802	0.244621	0.263206
rs1610682	29909303	rs1610682	logistic	1	2	29909303	1.62e-08	0.161818	3.02e-06	2.82e-06	0.000769041	0.364653	0.000783289	0.684813
rs1610699	29886966	rs1610699	logistic	1	2	29886966	1.66e-10	0.185758	3.7e-07	1.66e-08	0.00050456	0.675695	0.0190334	0.399212
rs1610726	29846644	rs1610726	logistic	1	2	29846644	3.07e-07	0.122026	0.000743205	1.95e-07	0.00109243	0.858922	0.0323274	0.683437
rs1610742	29785931	rs1610742	logistic	1	2	29785931	0.156981	0.0260557	0.160811	0.0127966	0.747341	0.390002	0.00179097	0.839625
rs1611133	29917361	rs1611133	logistic	1	2	29917361	1.2e-08	0.226456	2.59e-06	2.22e-06	0.000783626	0.330784	0.00111235	0.698633
rs1611149	29897978	rs1611149	logistic	1	2	29897978	5.15e-15	0.308749	2.18e-11	3.59e-10	0.00367211	0.075765	0.115466	0.0803792
rs1611185	29876323	rs1611185	logistic	1	2	29876323	2.23e-22	0.160301	5.46e-17	1.05e-12	8.53e-05	0.00765512	0.0012908	0.117007
rs1611196	29865974	rs1611196	logistic	1	2	29865974	5.88e-07	0.0926071	8.75e-05	1.09e-06	0.0044372	0.847792	0.100806	0.533423
rs1611205	29867802	rs1611205	logistic	1	2	29867802	1.69e-11	0.179771	7.66e-07	2.21e-09	8.16e-05	0.875351	0.0170386	0.380767
rs1611285	29839766	rs1611285	logistic	1	2	29839766	0.790489	0.938879	0.429218	0.267604	0.645418	0.830733	0.387967	0.0222244
rs1611350	29806800	rs1611350	logistic	1	2	29806800	0.0826326	0.0773248	0.0609771	0.311671	0.353033	0.0395093	0.00493943	0.195524
rs1611631	29943633	rs1611631	logistic	1	2	29943633	3.69e-11	0.221962	1.08e-08	0.0110895	0.000387694	0.122979	0.716544	0.901211
rs1611635	29944442	rs1611635	logistic	1	2	29944442	1.85e-05	0.170514	0.00153175	5.08e-06	0.0175243	0.627539	0.00269514	0.289918
rs1611636	29944682	rs1611636	logistic	1	2	29944682	1.4e-16	0.170916	4.1e-10	0.00811896	3.35e-06	0.0600818	0.0416403	0.130834
rs1611697	29935364	rs1611697	logistic	1	2	29935364	1.42e-16	0.0909037	6.03e-09	0.0010342	3.99e-06	0.0510319	0.0478884	0.210283
rs1611699	29935732	rs1611699	logistic	1	2	29935732	5.3e-08	0.247056	2.25e-05	5.03e-08	0.0727733	0.189239	0.432304	0.392814
rs1611710	29936895	rs1611710	logistic	1	2	29936895	4.95e-08	0.222341	2.08e-05	4.84e-08	0.070519	0.178001	0.431232	0.392058
rs1611715	29937461	rs1611715	logistic	1	2	29937461	6.51e-36	0.563429	9.8e-28	4.36e-19	7.45e-07	0.00334234	0.00389324	0.110222
rs1611717	29937556	rs1611717	logistic	1	2	29937556	5.13e-08	0.221642	2.12e-05	4.93e-08	0.0711232	0.178517	0.431902	0.392604
rs1611732	29938987	rs1611732	logistic	1	2	29938987	5.13e-08	0.221642	2.12e-05	4.93e-08	0.0711232	0.178517	0.431902	0.392604
rs1611737	29939550	rs1611737	logistic	1	2	29939550	5.7e-08	0.221645	2.46e-05	4.92e-08	0.0711182	0.17825	0.431894	0.392596
rs1612904	32776996	rs1612904	logistic	1	2	32776996	5.66e-12	0.819721	0.0265473	0.0389369	8.33e-07	2.88e-11	5.91e-06	0.04912
rs1619376	31091305	rs1619376	logistic	1	2	31091305	5.97e-08	0.180882	4.55e-05	0.00152607	0.0778806	0.202904	0.0136702	0.0349865
rs1619379	29893214	rs1619379	logistic	1	2	29893214	6.75e-20	0.678385	5.39e-15	3.25e-12	1.93e-05	0.399049	0.130377	0.490549
rs1624944	31081514	rs1624944	logistic	1	2	31081514	3.47e-09	0.0693578	4.88e-06	0.000596013	0.0474315	0.162685	0.0571113	0.0547495
rs1625636	29840281	rs1625636	logistic	1	2	29840281	1.5e-12	0.301073	1.26e-07	0.000123951	0.000643444	0.00865339	0.0826312	0.464404
rs1626392	29840223	rs1626392	logistic	1	2	29840223	5.38e-19	0.273049	3.29e-16	1.93e-06	0.000467872	0.00297525	0.307106	0.666314
rs1627567	29790845	rs1627567	logistic	1	2	29790845	3.5e-21	0.249885	3.43e-18	1.97e-07	0.000171296	0.00218617	0.337662	0.667595
rs1628578	29803481	rs1628578	logistic	1	2	29803481	0.0416696	0.0188907	0.0586408	0.00333712	0.375388	0.1448	0.000416209	0.758094
rs1629068	29873270	rs1629068	logistic	1	2	29873270	2.01e-06	0.128744	0.000435627	1.34e-06	0.00518679	0.665798	0.0445151	0.701901
rs1632854	31083628	rs1632854	logistic	1	2	31083628	0.000450883	0.841126	0.000788894	0.0716459	0.553463	0.759548	1.31e-06	0.538349
rs1632874	30030102	rs1632874	logistic	1	2	30030102	1.38e-09	0.234948	4.66e-07	0.00413877	0.00461628	0.106922	0.0213449	0.87002
rs1632926	30069253	rs1632926	logistic	1	2	30069253	0.00017529	0.17544	0.00373005	3.02e-06	0.0937157	0.420449	0.00203335	0.254686
rs1632933	29905912	rs1632933	logistic	1	2	29905912	2.48e-09	0.294159	1.06e-06	7.62e-08	0.0352872	0.139859	0.240545	0.207214
rs1632942	29904619	rs1632942	logistic	1	2	29904619	8.67e-15	0.339666	3.64e-11	4.14e-10	0.00453601	0.0771026	0.105487	0.0889365
rs1632948	29902028	rs1632948	logistic	1	2	29902028	5.19e-15	0.308316	2.19e-11	3.59e-10	0.00368367	0.0758197	0.115461	0.0803447
rs1632949	29901703	rs1632949	logistic	1	2	29901703	6.13e-13	0.589845	3.45e-09	8.41e-10	0.000439913	0.58315	0.311776	0.956278
rs1632962	29791787	rs1632962	logistic	1	2	29791787	0.1372	0.0262936	0.137904	0.0126952	0.743332	0.391436	0.00118409	0.840866
rs1632964	29790218	rs1632964	logistic	1	2	29790218	0.145775	0.0257719	0.141602	0.0129778	0.77713	0.387485	0.0011993	0.837756
rs1632971	29885890	rs1632971	logistic	1	2	29885890	1.79e-09	0.3699	4.51e-07	0.00512425	0.00557076	0.0501233	0.02066	0.880745
rs1632983	29881488	rs1632983	logistic	1	2	29881488	5.95e-08	0.0882428	0.000149768	1.08e-07	0.000755643	0.949423	0.0743444	0.517863
rs1632984	29881371	rs1632984	logistic	1	2	29881371	8.4e-10	0.27011	4.63e-07	0.00517535	0.00353283	0.0503798	0.0207433	0.879676
rs1632987	29880528	rs1632987	logistic	1	2	29880528	2.01e-06	0.128744	0.000435627	1.34e-06	0.00518679	0.665798	0.0445151	0.701901
rs1632988	29880374	rs1632988	logistic	1	2	29880374	2.91e-06	0.115603	0.000505679	1.68e-06	0.0076908	0.868293	0.0492964	0.70883
rs1632995	29877600	rs1632995	logistic	1	2	29877600	1.82e-12	0.129335	8.91e-08	8.88e-10	5.16e-05	0.946878	0.0330541	0.272734
rs1632996	29877486	rs1632996	logistic	1	2	29877486	2.13e-12	0.126938	9.87e-08	9.45e-10	5.54e-05	0.961401	0.0341803	0.275085
rs1633005	29872451	rs1633005	logistic	1	2	29872451	7.5e-07	0.0825858	9.04e-05	6.87e-07	0.00154099	0.0928159	0.00163203	0.277874
rs1633009	29871066	rs1633009	logistic	1	2	29871066	1.94e-06	0.129434	0.000428255	1.33e-06	0.00511842	0.667599	0.0443651	0.700927
rs1633010	29870921	rs1633010	logistic	1	2	29870921	5.37e-08	0.0882428	0.000149768	7.88e-08	0.000755643	0.949423	0.0743444	0.517863
rs1633012	29866705	rs1633012	logistic	1	2	29866705	3.6e-11	0.289512	3.82e-08	0.00072435	0.00741498	0.0128185	0.0513999	0.58387
rs1633021	29854848	rs1633021	logistic	1	2	29854848	6.58e-05	0.0476098	0.00677254	8.38e-07	0.00700658	0.346971	0.142922	0.785442
rs1633030	29853773	rs1633030	logistic	1	2	29853773	2.78e-07	0.122026	0.000743205	1.43e-07	0.00109243	0.858922	0.0323274	0.683437
rs1633034	29851542	rs1633034	logistic	1	2	29851542	6.67e-08	0.0875313	0.000138278	1.11e-07	0.000890556	0.952069	0.074729	0.519114
rs1633036	29850788	rs1633036	logistic	1	2	29850788	1.37e-11	0.281632	2.67e-08	0.00050913	0.00612219	0.00890599	0.0500077	0.575825
rs1633038	29848016	rs1633038	logistic	1	2	29848016	2.01e-11	0.285383	3.48e-08	0.000632993	0.00617463	0.00900634	0.0502949	0.607403
rs1633041	29841202	rs1633041	logistic	1	2	29841202	3.74e-06	0.103739	0.000548156	1.27e-06	0.00694492	0.645213	0.0466092	0.713618
rs1633043	29840373	rs1633043	logistic	1	2	29840373	4.31e-11	0.377315	2.32e-08	0.000369472	0.00531038	0.0174731	0.167087	0.765629
rs1633059	29834529	rs1633059	logistic	1	2	29834529	0.0631293	0.150521	0.471981	0.011654	0.319687	0.620804	0.0444789	0.0473289
rs1633063	29834025	rs1633063	logistic	1	2	29834025	0.404151	0.0330248	0.462536	0.0173904	0.739725	0.111576	0.00486598	0.618058
rs1633070	29832126	rs1633070	logistic	1	2	29832126	4.2e-13	0.339564	4.35e-08	8.66e-05	0.000378514	0.00799865	0.0691322	0.441796
rs1633085	29823976	rs1633085	logistic	1	2	29823976	3.48e-05	0.198706	0.00105928	0.000114118	0.0857699	0.968716	0.0671775	0.0463657
rs1633086	29823741	rs1633086	logistic	1	2	29823741	0.85354	0.0414465	0.308742	0.101802	0.808072	0.26518	0.0690238	0.108419
rs1633096	29815246	rs1633096	logistic	1	2	29815246	0.263564	0.051682	0.359454	0.012523	0.841349	0.657936	0.0686945	0.6922
rs1633105	29891361	rs1633105	logistic	1	2	29891361	1.89e-07	0.0672271	2.84e-05	1.75e-06	0.0420069	0.392959	0.0185565	0.0389149
rs1634717	31080568	rs1634717	logistic	1	2	31080568	0.000286095	0.882243	0.000719354	0.069488	0.465559	0.746108	1e-06	0.460714
rs1634718	31080844	rs1634718	logistic	1	2	31080844	2.38e-11	0.456619	4.33e-09	0.0204528	0.00185066	0.0873069	0.00195204	0.26439
rs1634719	31081144	rs1634719	logistic	1	2	31081144	2.74e-07	0.791563	5.57e-06	0.071314	0.015061	0.188455	0.00765847	0.51263
rs1634721	31085659	rs1634721	logistic	1	2	31085659	0.655584	0.038627	0.0742529	0.0128278	0.532481	0.00321498	0.00179246	0.0883338
rs1634725	31089987	rs1634725	logistic	1	2	31089987	2.01e-07	0.773151	4.39e-06	0.0663362	0.0146648	0.181252	0.00728759	0.504356
rs1634731	31063660	rs1634731	logistic	1	2	31063660	4.97e-08	0.500409	0.000239591	0.000425194	0.0155012	0.00674905	0.307943	0.441528
rs1634761	31382006	rs1634761	logistic	1	2	31382006	2.3e-05	0.455437	0.116182	0.0106012	0.00472944	0.160703	7.52e-13	0.247301
rs1639114	31327203	rs1639114	logistic	1	2	31327203	0.104606	0.494706	0.00900289	0.987156	0.886638	0.797058	0.584173	0.192274
rs165255	30097674	rs165255	logistic	1	2	30097674	0.989606	0.0173037	0.625477	0.0311769	0.116995	0.921128	0.0443702	0.886307
rs165256	30094663	rs165256	logistic	1	2	30094663	1.8e-13	0.767832	5.4e-10	1.94e-05	4.69e-05	0.728358	0.250425	0.0633102
rs1655900	30024597	rs1655900	logistic	1	2	30024597	2.58e-05	0.123937	0.00231145	4.37e-06	0.0163612	0.718863	0.00257298	0.218204
rs1655906	30026233	rs1655906	logistic	1	2	30026233	7.77e-10	0.571001	6.88e-08	0.00129613	0.000945094	0.250189	0.163925	0.635068
rs166325	30101175	rs166325	logistic	1	2	30101175	2.26e-09	0.555737	6.15e-05	0.000281227	0.00131241	0.0353088	0.410922	0.206822
rs166327	30110860	rs166327	logistic	1	2	30110860	0.00123591	0.0103926	2.74e-05	0.000443668	0.973675	0.982949	0.073207	0.573394
rs16822660	32521538	rs16822660	logistic	1	2	32521538	4.31e-06	0.182129	0.0128772	0.0056621	0.0288203	0.0817223	0.857895	0.947915
rs16867690	29693362	rs16867690	logistic	1	2	29693362	0.000238762	0.222347	0.00133256	0.0493339	0.0854081	0.374788	0.00703427	0.0637029
rs16867845	30693312	rs16867845	logistic	1	2	30693312	0.182238	0.997096	0.556396	0.978536	0.0548219	0.301522	0.832605	0.47394
rs16868789	33180576	rs16868789	logistic	1	2	33180576	0.000230089	0.0617657	0.00051114	0.02622	0.715885	0.578307	0.176316	0.249716
rs16868943	33255705	rs16868943	logistic	1	2	33255705	5.61e-06	0.181784	0.000266722	0.00638898	0.20806	0.899189	0.110968	0.124431
rs16870921	32900618	rs16870921	logistic	1	2	32900618	8.84e-49	0.146273	1.08e-39	2.82e-16	8.37e-23	0.66222	0.00442961	0.322392
rs16871027	32924641	rs16871027	logistic	1	2	32924641	0.0148416	0.244694	0.000790536	0.291968	0.942014	0.305435	0.246145	0.668116
rs16871165	33017122	rs16871165	logistic	1	2	33017122	0.106262	0.367658	0.373162	0.134181	0.650023	0.847692	0.0371332	0.325925
rs16871169	33018855	rs16871169	logistic	1	2	33018855	0.786023	0.9281	0.495755	0.220696	0.977688	0.875415	0.463589	0.926903
rs16871297	33058195	rs16871297	logistic	1	2	33058195	3.41e-05	0.666577	0.00874838	0.182484	0.00096965	0.0653743	0.176496	0.16944
rs16895757	29870157	rs16895757	logistic	1	2	29870157	2.68e-06	0.0780457	0.00017174	0.0173446	0.070808	0.303742	0.899107	0.83155
rs16896044	30089729	rs16896044	logistic	1	2	30089729	5.16e-07	0.053809	1.28e-05	0.0162677	0.090276	0.342919	0.882977	0.617147
rs16896049	29911709	rs16896049	logistic	1	2	29911709	1.06e-06	0.0673446	5.76e-05	0.0135746	0.0835303	0.407735	0.857818	0.596048
rs16896742	30030719	rs16896742	logistic	1	2	30030719	5.3e-42	0.926729	1.58e-31	4.68e-16	7.03e-10	0.000199601	0.000367872	0.463865
rs16896853	30068310	rs16896853	logistic	1	2	30068310	0.00279121	0.807519	0.200502	0.0412305	0.00267953	0.531202	0.97325	0.887498
rs16896944	30134125	rs16896944	logistic	1	2	30134125	0.0198585	0.591308	0.607744	0.0402036	0.00477168	0.615389	0.997364	0.923531
rs16896958	30137238	rs16896958	logistic	1	2	30137238	0.137958	0.214103	0.392725	0.126871	0.156985	0.830797	0.0506344	0.959799
rs16896970	30140896	rs16896970	logistic	1	2	30140896	3.51e-07	0.05258	1.17e-05	0.0156906	0.0738406	0.337674	0.87639	0.612731
rs16897204	30262028	rs16897204	logistic	1	2	30262028	5.58e-14	0.543318	7.66e-14	2.37e-06	0.00053166	0.322022	0.908582	0.800001
rs16897337	30365760	rs16897337	logistic	1	2	30365760	0.401273	0.944978	0.412356	0.223741	0.143327	0.882594	0.578359	0.289493
rs16897339	30367251	rs16897339	logistic	1	2	30367251	0.306702	0.560845	0.308936	0.229191	0.204194	0.55556	0.55904	0.205986
rs16897572	30561692	rs16897572	logistic	1	2	30561692	0.000688405	0.881333	9.83e-05	0.244162	0.160888	0.37184	0.935801	0.805781
rs16897888	30848494	rs16897888	logistic	1	2	30848494	3.09e-18	0.291032	4.15e-15	0.000340451	1.3e-06	0.025752	1.43e-05	0.946044
rs16897919	30896567	rs16897919	logistic	1	2	30896567	0.263806	0.502712	0.2019	0.592463	0.117906	0.33257	0.409217	0.356996
rs16898614	31131819	rs16898614	logistic	1	2	31131819	0.627985	0.225234	0.109992	0.156237	0.978125	0.0610437	0.057824	0.67548
rs16899160	31364646	rs16899160	logistic	1	2	31364646	5.26e-12	0.440857	1.01e-08	0.0195706	0.00943797	0.336354	2.37e-27	0.927272
rs16899166	31366075	rs16899166	logistic	1	2	31366075	0.849827	0.200091	0.0800902	0.861078	0.0724522	0.54017	0.507337	0.233619
rs16899178	31369116	rs16899178	logistic	1	2	31369116	0.0493537	0.046071	0.507678	0.0888756	0.0451506	0.291928	0.835544	0.873434
rs16899203	31374314	rs16899203	logistic	1	2	31374314	0.0493537	0.046071	0.507678	0.0888756	0.0451506	0.291928	0.835544	0.873434
rs16899205	31374340	rs16899205	logistic	1	2	31374340	0.919484	0.0365628	0.0630157	0.287165	0.583874	0.324216	0.000149622	0.666194
rs16899207	31374366	rs16899207	logistic	1	2	31374366	0.935487	0.0359037	0.0650581	0.291003	0.574556	0.328377	0.000146401	0.664059
rs16899646	31524899	rs16899646	logistic	1	2	31524899	1.76e-11	0.551159	7.64e-13	1.53e-08	0.00363751	0.825803	0.0424115	0.935359
rs169494	32205854	rs169494	logistic	1	2	32205854	0.0771382	0.497322	0.0384318	0.0241495	0.187933	0.121807	0.44573	0.225154
rs17034	32904499	rs17034	logistic	1	2	32904499	0.00132952	0.294397	0.0536177	0.00623487	0.00273279	0.0408436	0.322835	0.145885
rs171329	33012639	rs171329	logistic	1	2	33012639	8.21e-21	0.0100946	4.14e-12	3.78e-06	1.25e-08	0.252623	0.210484	0.0395182
rs17180311	30047981	rs17180311	logistic	1	2	30047981	0.0365833	0.497028	0.724883	0.174079	0.0350754	0.228212	0.185641	0.380965
rs17180353	30051334	rs17180353	logistic	1	2	30051334	0.155529	0.11271	0.600051	0.0151079	0.206833	0.57939	0.783672	0.76202
rs17180570	30062763	rs17180570	logistic	1	2	30062763	6.39e-05	0.288237	5.54e-06	0.0327879	0.0221843	0.083593	0.460721	0.201202
rs17180794	30063518	rs17180794	logistic	1	2	30063518	6.52e-05	0.290359	5.35e-06	0.0323102	0.0235294	0.0837283	0.458826	0.202476
rs17186937	30060793	rs17186937	logistic	1	2	30060793	6.57e-05	0.291786	6.97e-06	0.0321025	0.0214174	0.0851295	0.456972	0.199663
rs17186944	30060899	rs17186944	logistic	1	2	30060899	6.39e-05	0.288237	5.54e-06	0.0327879	0.0221843	0.083593	0.460721	0.201202
rs17186979	30062830	rs17186979	logistic	1	2	30062830	6.47e-05	0.293906	6.91e-06	0.0318232	0.0209454	0.086126	0.455348	0.199202
rs17187077	30063201	rs17187077	logistic	1	2	30063201	6.39e-05	0.288237	5.54e-06	0.0327879	0.0221843	0.083593	0.460721	0.201202
rs17187141	30063367	rs17187141	logistic	1	2	30063367	6.39e-05	0.288237	5.54e-06	0.0327879	0.0221843	0.083593	0.460721	0.201202
rs17187523	30108702	rs17187523	logistic	1	2	30108702	6.27e-05	0.295433	6.73e-06	0.031366	0.0205755	0.0859218	0.457621	0.200204
rs17187693	30144312	rs17187693	logistic	1	2	30144312	3.51e-07	0.05258	1.17e-05	0.0156906	0.0738406	0.337674	0.87639	0.612731
rs17187707	30144507	rs17187707	logistic	1	2	30144507	2.37e-12	0.209892	9.72e-11	1.43e-05	0.000333666	0.0790371	0.656832	0.481415
rs17187735	30153376	rs17187735	logistic	1	2	30153376	1.26e-17	0.74603	1.37e-13	1.9e-10	4.06e-05	0.390621	0.000140696	0.318006
rs17187805	30169181	rs17187805	logistic	1	2	30169181	3.84e-12	0.394623	4.23e-07	6.81e-07	1.59e-05	0.406813	0.167306	0.836865
rs17187896	30179286	rs17187896	logistic	1	2	30179286	0.0225313	0.188186	0.0422679	0.14406	0.022332	0.0376336	0.167373	0.488423
rs17187917	30188622	rs17187917	logistic	1	2	30188622	0.452007	0.565877	0.0484207	0.657172	0.891683	0.403113	0.40511	0.0381063
rs17188015	30220176	rs17188015	logistic	1	2	30220176	0.00696586	0.41387	0.0825029	0.191485	0.002661	0.389708	0.502094	0.394405
rs17188050	30223752	rs17188050	logistic	1	2	30223752	0.00429274	0.240074	0.0138823	0.376543	0.00238361	0.0776986	0.0837472	0.357149
rs17188113	30239102	rs17188113	logistic	1	2	30239102	0.00625211	0.348443	0.0590436	0.174515	0.00608829	0.658609	0.744452	0.401423
rs17188127	30243081	rs17188127	logistic	1	2	30243081	0.00605786	0.771632	0.0199946	0.414209	0.00313815	0.0494462	0.134904	0.153825
rs17188163	30250244	rs17188163	logistic	1	2	30250244	0.696686	0.166172	0.295877	0.16816	0.866647	0.0786903	0.00028014	0.536696
rs17188226	30276475	rs17188226	logistic	1	2	30276475	4.36e-12	0.57002	3.04e-07	0.0167128	7.92e-06	0.66572	0.00230971	0.316416
rs17188268	30307337	rs17188268	logistic	1	2	30307337	0.0178562	0.369372	0.0242336	0.363391	0.0137776	0.0361662	0.107475	0.243624
rs17188303	30335185	rs17188303	logistic	1	2	30335185	7.15e-06	0.507596	0.00553717	0.119667	1.16e-06	0.402726	0.310242	0.817742
rs17188470	30390414	rs17188470	logistic	1	2	30390414	0.570682	0.936301	0.406203	0.374154	0.252228	0.921548	0.540134	0.60224
rs17188484	30401564	rs17188484	logistic	1	2	30401564	0.122973	0.699788	0.0226738	0.107752	0.209913	0.0191232	0.547602	0.457362
rs17188491	30401571	rs17188491	logistic	1	2	30401571	0.00285891	0.225071	0.109691	0.111611	0.143236	0.132556	0.467616	0.839279
rs17188526	30409963	rs17188526	logistic	1	2	30409963	0.00587344	0.197743	0.282165	0.0251726	0.000478802	0.278847	0.880761	0.506583
rs17188632	30458461	rs17188632	logistic	1	2	30458461	0.00383803	0.756628	0.00764579	0.12438	0.0495675	0.489511	0.480144	0.853836
rs17188743	30493090	rs17188743	logistic	1	2	30493090	6.51e-19	0.780391	5.18e-13	2.18e-05	1.43e-07	0.193208	4.19e-06	0.952379
rs17188799	30521473	rs17188799	logistic	1	2	30521473	0.0251292	0.81162	0.000326734	0.728524	0.0241106	0.0315082	0.588496	0.630748
rs17189120	30671341	rs17189120	logistic	1	2	30671341	0.201632	0.77759	0.566294	0.989385	0.0522423	0.298298	0.836966	0.476248
rs17189134	30678459	rs17189134	logistic	1	2	30678459	0.246313	0.740674	0.645984	0.943897	0.0672083	0.28514	0.808736	0.605285
rs17189190	30697393	rs17189190	logistic	1	2	30697393	0.162158	0.553078	0.132943	0.647916	0.290106	0.892988	0.90726	0.350611
rs17189441	30866534	rs17189441	logistic	1	2	30866534	0.652561	0.788044	0.496687	0.305976	0.822631	0.061114	0.791752	0.754441
rs17190071	31107682	rs17190071	logistic	1	2	31107682	4.12e-24	0.70986	3.62e-19	1.14e-10	5.05e-05	0.625527	1.78e-13	0.715353
rs17190351	31155427	rs17190351	logistic	1	2	31155427	0.0541812	0.213075	0.78968	0.865611	0.0289585	0.119034	0.352538	0.193997
rs17193851	30097167	rs17193851	logistic	1	2	30097167	5.57e-05	0.293783	6.94e-06	0.0316578	0.0209125	0.118421	0.459586	0.200989
rs17193886	30133628	rs17193886	logistic	1	2	30133628	0.000280434	0.568665	0.000181074	0.00662101	0.0211815	0.013826	0.597217	0.415212
rs17194174	30169889	rs17194174	logistic	1	2	30169889	2.16e-12	0.533191	8.4e-07	1.19e-07	1.64e-05	0.364685	0.19411	0.885937
rs17194188	30172681	rs17194188	logistic	1	2	30172681	2.66e-18	0.74499	7.37e-18	3.65e-08	0.000683727	0.0345726	0.345319	0.624148
rs17194209	30173365	rs17194209	logistic	1	2	30173365	0.0196512	0.180263	0.0436567	0.151772	0.019639	0.0364964	0.153622	0.752707
rs17194293	30189088	rs17194293	logistic	1	2	30189088	0.517154	0.587927	0.0563112	0.68562	0.839998	0.380184	0.389898	0.0361756
rs17194363	30211922	rs17194363	logistic	1	2	30211922	0.57993	0.628595	0.0984683	0.902691	0.710506	0.419265	0.474101	0.191134
rs17194474	30239690	rs17194474	logistic	1	2	30239690	1.8e-08	0.400801	1.74e-07	0.000228482	0.000439298	0.348856	0.0685666	0.276011
rs17194627	30289617	rs17194627	logistic	1	2	30289617	6.44e-12	0.583221	3.67e-07	0.0177403	9.3e-06	0.679403	0.00236582	0.319877
rs17194648	30318386	rs17194648	logistic	1	2	30318386	0.559859	0.0150383	0.886822	0.062349	0.405102	0.263645	0.000113921	0.545313
rs17194767	30364864	rs17194767	logistic	1	2	30364864	0.401273	0.944978	0.412356	0.223741	0.143327	0.882594	0.578359	0.289493
rs17194789	30379091	rs17194789	logistic	1	2	30379091	0.581486	0.940269	0.400542	0.378133	0.256395	0.925016	0.542597	0.604428
rs17194824	30401165	rs17194824	logistic	1	2	30401165	1.01e-10	0.220789	8.11e-06	0.0372988	0.000226324	0.0886802	0.0118698	0.0837125
rs17194845	30405709	rs17194845	logistic	1	2	30405709	0.00812418	0.204534	0.329401	0.0241852	0.000437037	0.286568	0.87344	0.913187
rs17194852	30409572	rs17194852	logistic	1	2	30409572	0.73654	0.994927	0.374475	0.535367	0.282647	0.995444	0.498417	0.808949
rs17194859	30422039	rs17194859	logistic	1	2	30422039	0.492344	0.836033	0.062935	0.918738	0.687217	0.67186	0.184578	0.51792
rs17195054	30492583	rs17195054	logistic	1	2	30492583	3.73e-07	0.787066	2.58e-05	0.00174771	0.0391919	0.0169901	0.112138	0.0725746
rs17195089	30493036	rs17195089	logistic	1	2	30493036	5.55e-19	0.780682	5.26e-13	2.19e-05	1.15e-07	0.19352	4.22e-06	0.952466
rs17195173	30522067	rs17195173	logistic	1	2	30522067	0.00922028	0.792195	0.0214323	0.354691	0.0263731	0.189946	0.0948836	0.284411
rs17195446	30661832	rs17195446	logistic	1	2	30661832	0.258514	0.545854	0.14225	0.605424	0.545714	0.867563	0.919705	0.354015
rs17195474	30679176	rs17195474	logistic	1	2	30679176	0.228334	0.748308	0.637076	0.945939	0.0660479	0.304663	0.802136	0.858508
rs17195516	30688064	rs17195516	logistic	1	2	30688064	0.204065	0.774938	0.567811	0.985868	0.053126	0.298658	0.836128	0.475801
rs17196961	31202782	rs17196961	logistic	1	2	31202782	1.24e-10	0.776807	3.16e-09	0.0001306	0.028583	6.53e-05	0.259532	0.00563087
rs17201171	31881954	rs17201171	logistic	1	2	31881954	3.69e-08	0.364467	1.96e-05	0.00454454	0.00112798	0.507245	0.361401	0.457173
rs17201431	32023992	rs17201431	logistic	1	2	32023992	6.14e-05	0.13193	5.66e-05	0.147716	0.0290904	0.48302	0.320455	0.0555905
rs17207190	31677499	rs17207190	logistic	1	2	31677499	2.37e-13	0.758578	2.94e-09	9.96e-05	0.000120483	0.00232714	0.148473	0.059005
rs17207986	32187545	rs17207986	logistic	1	2	32187545	9.87e-20	0.375277	8.7e-21	9.47e-07	0.00181295	0.039872	6.33e-13	0.000673874
rs17208888	32487484	rs17208888	logistic	1	2	32487484	5.53e-67	1.08e-09	5.83e-42	8.06e-20	2.38e-29	0.738301	0.00721485	0.0251123
rs172274	33077435	rs172274	logistic	1	2	33077435	0.629818	0.26631	0.593042	0.294691	0.915024	0.341845	0.0792981	0.476477
rs172276	33067748	rs172276	logistic	1	2	33067748	1.86e-08	0.0964231	0.014975	0.00760805	8.56e-05	0.00754072	0.253206	0.00985956
rs17281677	30730438	rs17281677	logistic	1	2	30730438	1.98e-19	0.0562942	2.22e-10	0.000667554	1.96e-07	0.0325974	0.115531	0.0903917
rs17351888	29627152	rs17351888	logistic	1	2	29627152	0.932086	0.404331	0.653937	0.52417	0.492702	0.0954259	0.319559	0.261826
rs17354619	30421247	rs17354619	logistic	1	2	30421247	2.39e-18	0.359703	7.67e-13	3.13e-09	0.000100049	0.0233936	3.06e-06	0.760335
rs1736911	29813751	rs1736911	logistic	1	2	29813751	5.55e-12	0.241567	5.67e-09	0.000443126	0.00635257	0.0095068	0.0603207	0.667741
rs1736913	29812379	rs1736913	logistic	1	2	29812379	2.94e-18	0.100885	3.33e-12	1.64e-07	0.000319454	0.000298208	0.897211	0.257917
rs1736915	29812295	rs1736915	logistic	1	2	29812295	0.941943	0.0619798	0.655695	0.0408268	0.846992	0.31377	0.157114	0.897316
rs1736922	29801948	rs1736922	logistic	1	2	29801948	0.0416696	0.0188907	0.0586408	0.00333712	0.375388	0.1448	0.000416209	0.758094
rs1736926	29800541	rs1736926	logistic	1	2	29800541	2.66e-13	0.21453	3.07e-08	8.3e-05	0.000355983	0.0145507	0.0799061	0.566695
rs1736936	29902296	rs1736936	logistic	1	2	29902296	3.64e-09	0.312451	2.2e-06	1.04e-07	0.03762	0.122398	0.125329	0.27892
rs1736951	29893755	rs1736951	logistic	1	2	29893755	1.66e-12	0.184715	1.21e-09	3.42e-09	0.000614454	0.672104	0.0618614	0.575452
rs1736959	29890449	rs1736959	logistic	1	2	29890449	1.96e-06	0.148846	0.00045154	1.38e-06	0.00534503	0.664004	0.0448566	0.704078
rs1736969	29884369	rs1736969	logistic	1	2	29884369	1.87e-06	0.124816	0.000435627	1.34e-06	0.00461073	0.665798	0.0445151	0.701901
rs1736971	29884301	rs1736971	logistic	1	2	29884301	1.95e-06	0.129331	0.000429189	1.33e-06	0.00512596	0.667299	0.0444004	0.701174
rs1736976	29881978	rs1736976	logistic	1	2	29881978	4.6e-10	0.0783436	3.96e-06	5.92e-09	0.000239745	0.989844	0.0474259	0.413248
rs1736981	29878301	rs1736981	logistic	1	2	29878301	1.02e-08	0.312044	3.02e-08	0.00846939	0.316985	0.000744313	0.179152	0.501767
rs1736982	29877500	rs1736982	logistic	1	2	29877500	1.02e-08	0.312044	3.02e-08	0.00846939	0.316985	0.000744313	0.179152	0.501767
rs1736983	29876028	rs1736983	logistic	1	2	29876028	2.01e-06	0.128744	0.000435627	1.34e-06	0.00518679	0.665798	0.0445151	0.701901
rs1736991	29874905	rs1736991	logistic	1	2	29874905	5.95e-08	0.0882428	0.000149768	1.08e-07	0.000755643	0.949423	0.0743444	0.517863
rs1736998	29873695	rs1736998	logistic	1	2	29873695	1.03e-11	0.0837763	1.77e-07	1.68e-09	9.7e-05	0.95604	0.0383358	0.293736
rs1737041	29844208	rs1737041	logistic	1	2	29844208	3.23e-06	0.10597	0.000508316	2.02e-06	0.00584877	0.652407	0.0458686	0.709432
rs1737043	29844026	rs1737043	logistic	1	2	29844026	1.59e-08	0.270157	4.38e-08	0.00869021	0.318424	0.00102912	0.37699	0.49131
rs1737052	29842097	rs1737052	logistic	1	2	29842097	1.73e-08	0.271555	4.83e-08	0.0103421	0.299305	0.00149791	0.377004	0.425606
rs1737060	29840948	rs1737060	logistic	1	2	29840948	2.22e-12	0.281231	2.34e-07	4.62e-05	0.000772448	0.00688391	0.105932	0.645074
rs1737064	29839242	rs1737064	logistic	1	2	29839242	1.03e-12	0.296766	1.15e-07	0.000118784	0.00051025	0.00846895	0.0816991	0.46161
rs1737069	29838709	rs1737069	logistic	1	2	29838709	2.43e-24	0.0205566	6.96e-17	6.92e-08	1.74e-05	0.000262767	0.269311	0.501697
rs1737070	29838525	rs1737070	logistic	1	2	29838525	1.28e-12	0.301591	1.28e-07	0.000124757	0.000547862	0.00869289	0.0826967	0.464203
rs1737076	29833300	rs1737076	logistic	1	2	29833300	0.843557	0.0201195	0.32789	0.159887	0.730644	0.255903	0.0505891	0.0783314
rs1737078	29832918	rs1737078	logistic	1	2	29832918	0.853032	0.0200198	0.326096	0.160525	0.707021	0.255219	0.0507089	0.0784687
rs1737079	29832724	rs1737079	logistic	1	2	29832724	8.8e-13	0.293626	8.42e-08	0.000114472	0.000575304	0.00830508	0.0807624	0.458984
rs1737084	29825318	rs1737084	logistic	1	2	29825318	2.58e-13	0.161881	4.3e-08	0.000129362	0.000415212	0.00881596	0.0835451	0.4675
rs1737086	29822392	rs1737086	logistic	1	2	29822392	0.853051	0.0379531	0.321137	0.116726	0.786758	0.284835	0.065614	0.10634
rs17410877	30517135	rs17410877	logistic	1	2	30517135	3.69e-23	0.891334	4.15e-16	1.44e-07	4.75e-09	0.206947	2.27e-06	0.804473
rs17411410	30528886	rs17411410	logistic	1	2	30528886	0.0251292	0.81162	0.000326734	0.728524	0.0241106	0.0315082	0.588496	0.630748
rs17411480	30531096	rs17411480	logistic	1	2	30531096	0.0244504	0.81525	0.00031256	0.733889	0.0238501	0.0322758	0.57103	0.633176
rs17421624	32174155	rs17421624	logistic	1	2	32174155	9.14e-42	0.00241346	8.91e-20	5.95e-15	1.51e-13	5.28e-09	0.000487719	0.657112
rs174220	30125735	rs174220	logistic	1	2	30125735	1.68e-09	0.553238	5.97e-05	0.000182756	0.00128104	0.0350464	0.409576	0.206198
rs17422727	32367901	rs17422727	logistic	1	2	32367901	4.08e-06	0.349796	1.55e-06	0.173755	0.0281877	0.541589	0.77044	0.850041
rs17422797	32373506	rs17422797	logistic	1	2	32373506	8.45e-06	0.713158	0.0383067	0.0118599	7.15e-05	0.0118671	0.934153	0.409588
rs17423649	32465111	rs17423649	logistic	1	2	32465111	1.11e-16	0.339828	3.75e-10	2.03e-07	1.89e-08	0.88373	0.000101109	0.692288
rs17427599	32775342	rs17427599	logistic	1	2	32775342	2.57e-42	0.0579243	2.05e-26	1.05e-14	7.71e-13	5.62e-07	3.86e-07	0.0312142
rs17429444	32894046	rs17429444	logistic	1	2	32894046	2.71e-43	0.0683615	5.52e-30	3.42e-17	5.03e-17	0.717282	0.00128567	0.0149502
rs17472720	30391631	rs17472720	logistic	1	2	30391631	0.1513	0.694731	0.0305169	0.109745	0.205086	0.0194164	0.666174	0.45509
rs17475879	30472487	rs17475879	logistic	1	2	30472487	5.14e-07	0.970777	4.07e-05	0.000612459	0.0505531	0.0210427	0.084466	0.107422
rs17476793	30518967	rs17476793	logistic	1	2	30518967	4.05e-07	0.802106	3.96e-05	0.00131999	0.0428233	0.0117616	0.113742	0.0718049
rs17481190	30850993	rs17481190	logistic	1	2	30850993	0.669606	0.796858	0.479404	0.265429	0.826899	0.0632357	0.778951	0.747766
rs17493811	32253377	rs17493811	logistic	1	2	32253377	0.0333771	0.1989	0.000455628	0.192695	0.182738	3.11e-05	0.0209626	0.723633
rs17495592	32466511	rs17495592	logistic	1	2	32466511	1.81e-13	0.218221	2.04e-08	2.4e-06	8.76e-07	0.915935	0.000236545	0.862266
rs17496307	32509014	rs17496307	logistic	1	2	32509014	0.00030792	0.0721419	0.0577646	0.0313727	0.0328153	0.129751	3.16e-06	0.59678
rs17496549	32517686	rs17496549	logistic	1	2	32517686	4.14e-05	0.101068	0.0263627	0.0163673	0.0173086	0.0916402	3.22e-06	0.40143
rs17499655	32780113	rs17499655	logistic	1	2	32780113	6.51e-94	0.129015	4.62e-67	2.45e-38	1.81e-32	0.0542144	2.98e-09	0.0141963
rs17500468	32819156	rs17500468	logistic	1	2	32819156	7.69e-46	0.0434384	3.86e-25	1.13e-17	2.21e-24	0.493828	0.198167	0.0345808
rs17500510	32820796	rs17500510	logistic	1	2	32820796	0.71069	0.473088	0.97632	0.37018	0.141112	1.11e-06	0.836595	0.719831
rs17501267	32890126	rs17501267	logistic	1	2	32890126	0.71022	0.122531	0.355132	0.229821	0.859084	0.92895	0.754723	0.264026
rs17508548	29671046	rs17508548	logistic	1	2	29671046	2.71e-13	0.570677	4.04e-10	5.69e-05	0.0006161	0.0837617	0.382033	0.909581
rs17533090	32698700	rs17533090	logistic	1	2	32698700	2.09e-05	0.0633017	0.415351	0.0390258	1.21e-06	0.165164	0.000679895	0.0700958
rs17533167	32698822	rs17533167	logistic	1	2	32698822	4.09e-06	0.0268737	0.0420006	0.000903405	0.00151255	0.193874	2.27e-07	0.169357
rs17576984	32320963	rs17576984	logistic	1	2	32320963	3.6e-89	0.0141508	1.94e-85	2.85e-35	1.45e-25	0.0994112	0.668665	7.55e-05
rs17577980	32467799	rs17577980	logistic	1	2	32467799	3.73e-68	1.45e-09	1.18e-42	8.56e-20	9.57e-31	0.802292	0.0101797	0.0231838
rs17583244	32912665	rs17583244	logistic	1	2	32912665	1.43e-06	0.282584	0.000246041	0.00202382	0.0157089	0.304206	0.0287813	0.30505
rs17583782	33014693	rs17583782	logistic	1	2	33014693	0.00104844	0.96259	4.05e-06	0.0715219	0.919019	0.877426	0.520987	0.639525
rs17587	32933068	rs17587	logistic	1	2	32933068	0.00512934	0.0741919	0.0105607	0.827146	0.039819	0.958137	0.270496	0.972715
rs176095	32266297	rs176095	logistic	1	2	32266297	5.13e-28	0.976091	8.64e-16	5.04e-09	1.14e-09	0.00105484	8.14e-05	0.446187
rs17617321	33014563	rs17617321	logistic	1	2	33014563	0.000987362	0.95858	3.83e-06	0.0703099	0.911254	0.873669	0.518119	0.641857
rs17719	30819010	rs17719	logistic	1	2	30819010	0.00651606	0.706878	0.366337	0.00137382	0.423852	0.0111079	0.684119	0.609329
rs17839989	30177100	rs17839989	logistic	1	2	30177100	0.00106689	0.915394	0.126238	0.0324834	0.00396483	0.271055	0.982147	0.732472
rs17839997	30447272	rs17839997	logistic	1	2	30447272	0.000641269	0.557819	0.0308053	0.0453466	0.00170538	0.833795	0.992816	0.683783
rs17840186	33046177	rs17840186	logistic	1	2	33046177	0.0558777	0.506167	0.399605	0.127926	0.424057	0.684141	0.0176339	0.283525
rs17885557	31345065	rs17885557	logistic	1	2	31345065	3.21e-11	0.609666	2.75e-09	0.00356819	0.00311508	0.00127541	0.000292323	0.0125019
rs1793891	31329677	rs1793891	logistic	1	2	31329677	4.03e-05	0.0768325	2.76e-06	0.000539541	0.355008	0.75894	3.18e-07	0.0388238
rs1794275	32779226	rs1794275	logistic	1	2	32779226	8.24e-88	0.185353	6.6e-57	3.9e-31	4.14e-38	0.118878	1.86e-07	0.00141094
rs1794282	32774504	rs1794282	logistic	1	2	32774504	0.0326905	0.292916	0.729625	0.016214	0.190076	0.527848	0.00507471	0.291229
rs1799724	31650461	rs1799724	logistic	1	2	31650461	4.64e-09	0.879428	1.96e-06	0.000806659	0.000219412	0.412547	0.0511032	0.679922
rs1799908	33252221	rs1799908	logistic	1	2	33252221	0.0220332	0.497985	1.42e-05	0.002053	0.0214084	0.796469	0.86843	0.528985
rs1799910	33247306	rs1799910	logistic	1	2	33247306	0.000240206	0.148372	0.000132139	0.0355221	0.206856	0.7813	0.0678041	0.278962
rs1799911	33246655	rs1799911	logistic	1	2	33246655	1.88e-13	0.745142	2.48e-17	5.43e-08	0.253086	0.0524715	0.919914	0.630056
rs1799964	31650287	rs1799964	logistic	1	2	31650287	0.122634	0.259997	0.128537	0.039863	0.744569	0.779488	0.00583807	0.788152
rs1800454	32908390	rs1800454	logistic	1	2	32908390	1.12e-13	0.0359947	1.6e-08	4.27e-05	0.000222647	0.00521196	0.940622	0.0649766
rs1800610	31651806	rs1800610	logistic	1	2	31651806	1.56e-10	0.822343	4.62e-08	0.000439905	0.000138569	0.504057	0.0478375	0.691926
rs1800624	32260365	rs1800624	logistic	1	2	32260365	8.4e-128	0.00338926	2.56e-85	1.16e-45	7.63e-45	0.000478911	9.01e-06	0.0177766
rs1800625	32260420	rs1800625	logistic	1	2	32260420	5.1e-10	0.237604	7.51e-06	1.54e-05	0.0007128	0.12608	2.71e-05	0.591285
rs1800629	31651010	rs1800629	logistic	1	2	31651010	0.00340344	0.0685083	0.0647516	0.121287	0.0215609	0.329956	0.00191081	0.427013
rs1800683	31648050	rs1800683	logistic	1	2	31648050	4.54e-17	0.102231	1.72e-09	2.23e-05	0.00174953	0.0278575	6.14e-09	0.137713
rs1800684	32259972	rs1800684	logistic	1	2	32259972	4.93e-24	0.134339	3.04e-12	2.67e-07	7.23e-08	0.00238008	0.028896	0.0118167
rs1800750	31650942	rs1800750	logistic	1	2	31650942	0.0133891	0.633523	0.137755	0.231024	0.109981	0.403723	0.114836	0.952176
rs1810472	33191099	rs1810472	logistic	1	2	33191099	1.41e-16	0.0900809	8.22e-14	4.58e-11	0.000310092	0.0653575	0.105664	0.896469
rs181997	33008696	rs181997	logistic	1	2	33008696	0.0111161	0.0634517	0.00169357	0.735188	0.679375	0.640419	0.336443	0.658132
rs1833080	30537419	rs1833080	logistic	1	2	30537419	4.04e-28	0.270727	1.12e-17	1.75e-08	4.99e-08	0.000808054	0.00309438	0.166819
rs1842399	32861291	rs1842399	logistic	1	2	32861291	8.03e-65	0.264346	1.68e-36	6.79e-17	1.99e-27	0.00807923	0.0097751	9.38e-05
rs188245	33063954	rs188245	logistic	1	2	33063954	0.0915869	0.304302	0.496667	0.999348	0.267341	0.123911	0.584481	0.024147
rs1894406	32895034	rs1894406	logistic	1	2	32895034	7.73e-18	0.737052	2.02e-11	1.84e-06	2.01e-10	0.0627752	0.183545	0.0221416
rs1894407	32895014	rs1894407	logistic	1	2	32895014	1.56e-14	0.911102	3.62e-08	0.000158749	4.44e-09	0.897016	0.105498	0.137308
rs1894408	32894811	rs1894408	logistic	1	2	32894811	1.37e-14	0.910901	3.02e-08	0.000158959	4.46e-09	0.89717	0.105516	0.137321
rs1894411	32900951	rs1894411	logistic	1	2	32900951	2.93e-13	0.232797	8.4e-10	0.00114462	0.00130636	0.0147823	0.781377	0.219676
rs1894412	32842807	rs1894412	logistic	1	2	32842807	5.38e-31	0.133662	3.25e-18	4.48e-08	7.5e-15	0.0669844	0.125772	0.0133827
rs189605	30078991	rs189605	logistic	1	2	30078991	2.33e-09	0.565633	6.88e-05	0.00019479	0.00142589	0.0366142	0.419595	0.209464
rs189865	33022308	rs189865	logistic	1	2	33022308	1.58e-13	0.161716	3.96e-05	7.48e-05	1.66e-06	0.0156395	0.0992955	0.00892016
rs194675	33013724	rs194675	logistic	1	2	33013724	1.91e-21	0.010936	3.24e-10	3.7e-07	3.62e-08	0.148141	0.00908766	0.00132464
rs194679	32999316	rs194679	logistic	1	2	32999316	2.55e-10	0.142033	1.97e-09	0.0194623	0.000349235	0.0671598	0.169436	0.057421
rs194682	33022591	rs194682	logistic	1	2	33022591	7.92e-14	0.152403	3.84e-05	7.51e-05	7.48e-07	0.0221739	0.0838842	0.00626585
rs1964995	32557389	rs1964995	logistic	1	2	32557389	4.31e-97	2.09e-06	9.79e-98	3.75e-32	2.49e-33	5.3e-09	0.42503	0.372636
rs1966	31215712	rs1966	logistic	1	2	31215712	0.00201189	0.199606	0.237141	0.00518885	0.155964	0.384247	9.87e-10	0.733233
rs1967	30233516	rs1967	logistic	1	2	30233516	6.84e-18	0.695301	6.55e-11	2.46e-05	1.36e-06	0.0810239	0.000348237	0.833658
rs1970	30233522	rs1970	logistic	1	2	30233522	0.227048	0.167171	0.21555	0.00307527	0.681495	0.0122457	0.00774657	0.544258
rs1978029	32839688	rs1978029	logistic	1	2	32839688	5.16e-28	0.240615	1.04e-16	1.71e-07	1.61e-13	0.0828946	0.192529	0.0200284
rs1988565	32861470	rs1988565	logistic	1	2	32861470	3.96e-65	0.259197	1.19e-36	5.8e-17	1.51e-27	0.0077961	0.00954044	9.12e-05
rs2001097	32491836	rs2001097	logistic	1	2	32491836	0.000484792	0.162229	3.7e-06	0.147195	0.0260543	0.0040616	0.0288021	0.570933
rs2006165	32836765	rs2006165	logistic	1	2	32836765	9.5e-37	0.8523	1.07e-20	3.67e-11	1.66e-17	0.122339	0.00119497	0.00499824
rs2009658	31646223	rs2009658	logistic	1	2	31646223	0.0121669	0.517506	0.109092	0.789951	0.00444831	0.0227651	0.0889834	0.142257
rs2017525	29876482	rs2017525	logistic	1	2	29876482	0.000575455	0.315171	0.0288029	0.0244995	0.000144608	0.147633	0.877962	0.0358548
rs2021107	30336117	rs2021107	logistic	1	2	30336117	2.14e-12	0.659474	8.02e-06	0.00313819	5.96e-07	0.426172	0.0196482	0.0632392
rs2021163	30146362	rs2021163	logistic	1	2	30146362	0.00554213	0.874347	0.00200925	0.0238957	0.214411	0.116789	0.78508	0.273346
rs2021164	30486078	rs2021164	logistic	1	2	30486078	2.64e-19	0.509783	3.49e-13	2.45e-05	2.52e-07	0.149771	1.09e-05	0.752883
rs2021719	30557461	rs2021719	logistic	1	2	30557461	2.12e-16	0.61759	3.15e-09	2.41e-07	3.49e-05	0.00524564	4.56e-05	0.480404
rs2021720	30557223	rs2021720	logistic	1	2	30557223	1.47e-16	0.667568	2.47e-09	2.35e-07	3.39e-05	0.004251	4.54e-05	0.480219
rs2021723	30211902	rs2021723	logistic	1	2	30211902	7.31e-20	0.743413	3.32e-12	4.61e-06	2e-06	0.0264875	0.000463557	0.761801
rs2021731	30212576	rs2021731	logistic	1	2	30212576	7.48e-20	0.743558	3.37e-12	4.64e-06	2.01e-06	0.0265287	0.000465361	0.761958
rs2021749	29706098	rs2021749	logistic	1	2	29706098	0.000196848	0.181606	0.00110418	0.0497715	0.0765448	0.476969	0.00684342	0.0637706
rs2022059	32264467	rs2022059	logistic	1	2	32264467	2.79e-13	0.654874	3.58e-14	3.9e-05	4.35e-07	1.04e-06	0.692272	0.271487
rs2022065	30229439	rs2022065	logistic	1	2	30229439	1.11e-15	0.202082	8.36e-11	1.5e-10	0.00175646	0.176684	6.95e-06	0.809147
rs2022079	30445717	rs2022079	logistic	1	2	30445717	0.696646	0.624549	0.157865	0.288791	0.519054	0.0486838	0.98219	0.712214
rs2022082	30441799	rs2022082	logistic	1	2	30441799	0.814789	0.359354	0.472483	0.107439	0.752284	0.0731779	0.900634	0.557339
rs2022083	30321519	rs2022083	logistic	1	2	30321519	0.662776	0.353955	0.224944	0.0210524	0.627299	0.0146295	0.0514954	0.219185
rs2022084	31225032	rs2022084	logistic	1	2	31225032	0.998186	0.81778	0.240952	0.174556	0.886045	0.0852543	0.123949	0.912727
rs2022531	32417258	rs2022531	logistic	1	2	32417258	1.15e-63	0.0291535	1.41e-35	7.63e-16	2.2e-18	1.12e-08	0.00452975	0.00646018
rs2022533	32415238	rs2022533	logistic	1	2	32415238	0.00174203	0.295745	0.859412	0.684764	0.511415	1.29e-10	7.62e-05	0.409934
rs2022534	32415115	rs2022534	logistic	1	2	32415115	0.00519068	0.265707	0.927262	0.805055	0.668231	1.35e-10	0.00015698	0.509552
rs2022544	32428982	rs2022544	logistic	1	2	32428982	1.33e-95	0.113068	1.94e-69	5.38e-43	6.84e-29	0.00572254	0.00450126	0.00895721
rs2023372	30479997	rs2023372	logistic	1	2	30479997	0.0227622	0.760736	0.000371602	0.752562	0.0230845	0.0455506	0.708622	0.64029
rs2023470	30514995	rs2023470	logistic	1	2	30514995	0.02364	0.817486	0.000308986	0.736117	0.0232562	0.0321318	0.592477	0.634053
rs2023472	30183843	rs2023472	logistic	1	2	30183843	0.019673	0.667821	0.0425415	0.000879697	0.308679	0.0296106	0.121014	0.67708
rs2023473	30183592	rs2023473	logistic	1	2	30183592	0.182174	0.166017	0.18165	0.00230129	0.563924	0.00841481	0.00769258	0.542742
rs2023608	30584164	rs2023608	logistic	1	2	30584164	0.41791	0.399535	0.90609	0.646619	0.327051	0.486782	0.0344575	0.0429016
rs2023609	30584013	rs2023609	logistic	1	2	30584013	0.407614	0.399587	0.932675	0.646702	0.327137	0.486833	0.0344542	0.0429032
rs2027856	32510683	rs2027856	logistic	1	2	32510683	5.12e-15	0.0369278	1.12e-17	3.44e-10	0.000142183	0.00803347	0.0110958	0.589865
rs2027937	31224481	rs2027937	logistic	1	2	31224481	8.87e-11	0.567216	0.000538113	0.00213125	0.0083731	0.289005	1.72e-30	0.187619
rs2040450	30442318	rs2040450	logistic	1	2	30442318	0.0505563	0.833878	0.0198015	0.0848237	0.877442	0.634908	0.388094	0.896868
rs2040486	30302082	rs2040486	logistic	1	2	30302082	6.63e-06	0.708387	0.000478908	0.0015714	0.33165	0.000223573	0.3025	0.129701
rs204879	32151135	rs204879	logistic	1	2	32151135	5.51e-21	0.301495	6.06e-12	0.0012271	3.67e-08	0.000624436	0.834079	0.044826
rs204889	32194070	rs204889	logistic	1	2	32194070	4.36e-20	0.220662	3.66e-12	0.00373357	1.16e-07	0.00209287	0.72312	0.0385704
rs204890	32193576	rs204890	logistic	1	2	32193576	9.55e-20	0.158122	1.25e-11	0.00221318	1.88e-07	0.000905168	0.918376	0.0511989
rs204892	32205869	rs204892	logistic	1	2	32205869	5.43e-24	0.139612	1.43e-14	0.000503969	8.06e-09	0.000326538	0.961015	0.020856
rs204894	32201900	rs204894	logistic	1	2	32201900	1.21e-22	0.178782	5.34e-15	0.000287588	4.09e-07	0.00073315	0.989914	0.0456781
rs204895	32174198	rs204895	logistic	1	2	32174198	7.13e-21	0.230534	3.9e-12	0.00252035	4.72e-08	0.000922494	0.735487	0.0384723
rs204899	32165605	rs204899	logistic	1	2	32165605	0.308011	0.144792	0.504986	0.318514	0.77918	0.124225	0.561574	0.783481
rs204989	32269830	rs204989	logistic	1	2	32269830	5.17e-11	0.943292	1.36e-06	0.000449224	0.00049796	0.147053	0.000704165	0.675887
rs204990	32269408	rs204990	logistic	1	2	32269408	4.87e-11	0.927809	1.14e-06	0.000534973	0.000515768	0.14293	0.000684543	0.66992
rs204991	32269344	rs204991	logistic	1	2	32269344	4.1e-11	0.92013	1.04e-06	0.000513208	0.000482666	0.140605	0.00067501	0.667471
rs204992	32264886	rs204992	logistic	1	2	32264886	1.07e-28	0.945576	4.52e-16	2.48e-09	7.57e-10	0.00063576	9.01e-05	0.455926
rs204993	32263559	rs204993	logistic	1	2	32263559	4.51e-44	0.847385	4.51e-30	2.66e-14	2.2e-16	0.507548	0.00010476	0.202004
rs204994	32262976	rs204994	logistic	1	2	32262976	1.32e-28	0.919126	3.32e-16	2.18e-09	1.45e-09	0.000857195	5.57e-05	0.445142
rs204995	32262263	rs204995	logistic	1	2	32262263	2.15e-28	0.778083	1.07e-16	6.91e-09	9.9e-10	0.000568604	0.000110481	0.363737
rs204996	32257861	rs204996	logistic	1	2	32257861	7.28e-29	0.0361398	8.63e-16	3.95e-05	4.23e-10	0.000444239	0.59902	0.0138538
rs204999	32217957	rs204999	logistic	1	2	32217957	1.18e-43	0.660904	8.54e-26	4.97e-14	3.57e-15	0.00124275	3.83e-05	0.819589
rs205000	32243856	rs205000	logistic	1	2	32243856	0.445576	0.124698	0.901678	0.2494	0.426578	0.423806	0.433692	0.382908
rs2050189	32447625	rs2050189	logistic	1	2	32447625	0.479404	0.214631	0.34146	0.472523	0.0447374	0.567968	0.00503158	0.0608245
rs2050190	32447054	rs2050190	logistic	1	2	32447054	1.72e-68	0.000722655	1.5e-58	2.94e-26	3.45e-25	0.00675653	0.95881	0.053116
rs2057726	30443329	rs2057726	logistic	1	2	30443329	6.86e-31	0.0475138	2.94e-15	9.7e-09	4.73e-09	0.000442903	0.000392332	0.0168464
rs2057727	30405508	rs2057727	logistic	1	2	30405508	0.00153213	0.379613	0.0225779	0.0848346	0.011545	0.248046	0.328651	0.260972
rs2057728	30162736	rs2057728	logistic	1	2	30162736	2.75e-22	0.155664	3.32e-19	2.2e-13	0.000367048	0.13269	0.0178994	0.122954
rs206015	32290737	rs206015	logistic	1	2	32290737	4.11e-34	0.0267004	2.54e-28	4.96e-08	2.71e-11	0.647146	0.886534	0.0144364
rs206016	32289160	rs206016	logistic	1	2	32289160	3.79e-35	0.0289469	4.13e-29	3.38e-08	2.02e-11	0.797876	0.963284	0.0175398
rs206018	32285858	rs206018	logistic	1	2	32285858	0.00445552	0.346509	0.133091	0.0258534	0.391105	0.723321	2.22e-06	0.290914
rs2064474	33181441	rs2064474	logistic	1	2	33181441	0.000285232	0.00193001	8.51e-12	0.00153014	0.010729	0.00740814	0.053832	0.954138
rs2064476	33181300	rs2064476	logistic	1	2	33181300	5.47e-12	0.0759873	1.26e-17	0.000113772	0.852681	2.23e-06	0.0505498	0.522041
rs2064478	33180244	rs2064478	logistic	1	2	33180244	0.000959901	0.0073534	2.45e-10	0.00417198	0.00827086	0.00596467	0.046593	0.839343
rs2066752	33056274	rs2066752	logistic	1	2	33056274	3.96e-08	0.423483	4.78e-05	0.0114044	0.0096704	0.0452368	0.899435	0.0455616
rs2067577	32870462	rs2067577	logistic	1	2	32870462	1.25e-78	0.274366	9e-50	1.01e-21	1.87e-34	0.813517	0.00493457	0.000167811
rs206762	33078428	rs206762	logistic	1	2	33078428	0.200305	0.23459	0.392081	0.766048	0.122055	0.966468	0.0710985	0.237294
rs206767	33070398	rs206767	logistic	1	2	33070398	0.784639	0.194895	0.7676	0.363738	0.677623	0.630727	0.926979	0.381389
rs206768	33069365	rs206768	logistic	1	2	33069365	1.3e-08	0.0884269	0.0102133	0.00857789	9.5e-05	0.00649422	0.261414	0.0102925
rs206775	33062612	rs206775	logistic	1	2	33062612	3.18e-08	0.115512	0.0161198	0.00799004	0.000146307	0.00614579	0.214753	0.0149341
rs206786	33043157	rs206786	logistic	1	2	33043157	1.44e-11	0.0347773	0.000339072	0.0020495	5.05e-06	0.0338585	0.144834	0.0116567
rs2070120	32888891	rs2070120	logistic	1	2	32888891	2.47e-12	0.0692341	5.16e-12	0.0317655	1.75e-05	0.376897	0.218196	0.292659
rs2070121	32889531	rs2070121	logistic	1	2	32889531	5.87e-12	0.10362	1.12e-11	0.0375475	2.08e-05	0.344889	0.169287	0.307059
rs2070600	32259421	rs2070600	logistic	1	2	32259421	2.6e-07	0.897645	8.43e-10	0.0014898	0.000705631	4.16e-06	0.736301	0.609527
rs2071277	32279661	rs2071277	logistic	1	2	32279661	2.55e-29	0.00376225	1.09e-23	8.37e-08	4.23e-10	0.388165	0.39189	0.0641429
rs2071278	32273422	rs2071278	logistic	1	2	32273422	0.277431	0.257779	0.552054	0.110785	0.697332	0.498613	0.000266749	0.288779
rs2071279	32272852	rs2071279	logistic	1	2	32272852	6.11e-65	0.05095	1.85e-44	1.46e-21	2.04e-23	0.00838091	0.00213084	0.526387
rs2071285	32288409	rs2071285	logistic	1	2	32288409	5.79e-15	0.204856	6.97e-17	5.77e-05	1.89e-05	0.000274673	0.772213	0.188326
rs2071286	32287874	rs2071286	logistic	1	2	32287874	4.49e-105	0.00304688	1.19e-70	4.66e-37	1.43e-37	0.00373834	1.47e-06	0.404597
rs2071287	32278411	rs2071287	logistic	1	2	32278411	1.28e-29	0.00344255	1e-23	6.24e-08	3.39e-10	0.372252	0.424753	0.0483057
rs2071292	32263926	rs2071292	logistic	1	2	32263926	0.000282076	0.407103	0.000495717	0.00898938	0.0115742	0.399657	0.0746003	0.0537127
rs2071293	32170665	rs2071293	logistic	1	2	32170665	2.54e-41	0.00229765	2.2e-19	1.93e-14	1.22e-13	4.86e-09	0.000468946	0.651217
rs2071295	32146678	rs2071295	logistic	1	2	32146678	2.36e-46	0.00271685	9.89e-24	7.99e-16	5.16e-15	7.77e-09	0.000877997	0.755609
rs2071349	33151498	rs2071349	logistic	1	2	33151498	5.07e-64	0.695405	6.64e-58	3.24e-32	1.01e-14	0.0030588	0.828166	0.0589907
rs2071354	33152366	rs2071354	logistic	1	2	33152366	3.23e-06	0.216476	0.00010547	0.112856	0.253729	0.00170525	0.201748	0.418441
rs2071362	33141252	rs2071362	logistic	1	2	33141252	7e-59	0.825513	2.86e-51	2.47e-30	1.07e-14	0.00765498	0.952257	0.0467663
rs2071463	32920506	rs2071463	logistic	1	2	32920506	0.242319	0.308255	0.0436477	0.942193	0.455085	0.997639	0.0997199	0.147238
rs2071465	32913448	rs2071465	logistic	1	2	32913448	0.00158135	0.898241	0.00250247	0.0477932	0.106926	0.156677	0.0353	0.381582
rs2071468	32893013	rs2071468	logistic	1	2	32893013	6.38e-20	0.09907	2.17e-19	0.000296239	1.47e-07	0.773605	0.211825	0.222407
rs2071469	32892761	rs2071469	logistic	1	2	32892761	1.09e-33	0.890613	8.58e-24	1.3e-12	1.01e-13	0.518919	0.0790451	0.00282724
rs2071470	32892731	rs2071470	logistic	1	2	32892731	3.31e-13	0.415759	1.38e-07	6.08e-08	1.81e-06	0.607233	0.257802	0.013927
rs2071472	32892598	rs2071472	logistic	1	2	32892598	3.56e-13	0.414214	1.44e-07	4.4e-08	2.26e-06	0.605338	0.258594	0.0139741
rs2071473	32890583	rs2071473	logistic	1	2	32890583	3.27e-26	0.364295	8.02e-15	5.73e-10	1.35e-12	0.123071	0.078987	0.0478598
rs2071474	32890560	rs2071474	logistic	1	2	32890560	3.31e-13	0.418536	1.29e-07	5.8e-08	2.06e-06	0.610559	0.255845	0.0137524
rs2071475	32890365	rs2071475	logistic	1	2	32890365	6.04e-06	0.118741	0.0146181	0.00297225	0.000269477	0.362755	0.148505	0.00785058
rs2071476	32933357	rs2071476	logistic	1	2	32933357	9.18e-24	0.0114315	3.66e-21	5.19e-05	1.2e-07	0.4382	0.706832	0.336153
rs2071477	32933326	rs2071477	logistic	1	2	32933326	3.49e-12	0.0229089	5.14e-11	0.00790718	0.000814681	0.369954	0.318094	0.213592
rs2071479	32889090	rs2071479	logistic	1	2	32889090	0.0255524	0.447588	0.00495782	0.00318753	0.261304	1.03e-06	0.906776	0.39118
rs2071481	32927843	rs2071481	logistic	1	2	32927843	4.23e-11	0.111555	7.13e-12	0.001003	0.014323	0.844011	0.430467	0.586058
rs2071482	32924678	rs2071482	logistic	1	2	32924678	1.46e-24	0.619674	3.94e-21	9.04e-08	6.76e-08	0.110453	0.441788	0.217083
rs2071534	32932296	rs2071534	logistic	1	2	32932296	1.02e-23	0.01395	3.5e-21	5.12e-05	1.17e-07	0.437163	0.707725	0.335608
rs2071538	32926656	rs2071538	logistic	1	2	32926656	1.16e-07	0.924287	0.00128087	0.000855503	0.000339064	0.208491	0.290027	0.073449
rs2071540	32920894	rs2071540	logistic	1	2	32920894	0.000208262	0.295927	0.000255415	0.405729	0.0433957	0.178432	0.253868	0.65282
rs2071541	32920836	rs2071541	logistic	1	2	32920836	9.88e-41	0.00576937	2.8e-40	2.67e-13	4.58e-10	0.833734	0.147395	0.590947
rs2071542	32919623	rs2071542	logistic	1	2	32919623	3.26e-26	0.744831	3.94e-25	3.3e-10	1.54e-07	0.614389	0.261527	0.107365
rs2071543	32919607	rs2071543	logistic	1	2	32919607	1.81e-21	0.0633368	1.46e-17	2.77e-06	7.76e-07	0.516613	0.433315	0.0293901
rs2071544	32914099	rs2071544	logistic	1	2	32914099	0.816029	0.789567	0.654291	0.867231	0.790601	0.257111	0.189728	0.715261
rs2071550	32838918	rs2071550	logistic	1	2	32838918	2.39e-87	0.0059076	3.59e-64	3.97e-22	4.13e-36	0.599629	0.0856882	5.28e-05
rs2071551	32837437	rs2071551	logistic	1	2	32837437	1.47e-33	0.82955	3.2e-19	2.6e-10	1.29e-16	0.165039	0.00395245	0.00839434
rs2071552	32914439	rs2071552	logistic	1	2	32914439	0.814082	0.628158	0.822075	0.635304	0.954832	0.472566	0.0428867	0.951261
rs2071556	33012579	rs2071556	logistic	1	2	33012579	3.89e-11	0.0357261	5.2e-09	0.0102555	0.000265102	0.561369	0.939254	0.0281993
rs2071568	30051260	rs2071568	logistic	1	2	30051260	2.57e-56	0.855224	1.1e-44	6.77e-25	5.72e-10	1.72e-05	0.000478699	0.0213356
rs2071592	31623319	rs2071592	logistic	1	2	31623319	1.67e-14	0.0999727	9.63e-07	3.56e-05	0.00308465	0.0224947	1.38e-09	0.322508
rs2071593	31620778	rs2071593	logistic	1	2	31620778	6.41e-06	0.351936	0.00114076	0.00664545	0.000128857	0.759316	0.0956464	0.926213
rs2071594	31620699	rs2071594	logistic	1	2	31620699	1.47e-16	0.189154	1.32e-09	6.95e-05	0.00206549	0.0229734	4.47e-09	0.182842
rs2071596	31614670	rs2071596	logistic	1	2	31614670	7.92e-13	0.727175	3.01e-08	0.000414711	0.178989	0.0407467	4.29e-23	0.293565
rs2071653	29743907	rs2071653	logistic	1	2	29743907	4.2e-14	0.505947	4.24e-13	0.00014496	0.00232329	0.00408501	0.285393	0.78605
rs2071876	33056404	rs2071876	logistic	1	2	33056404	0.373615	0.0799903	0.743577	0.251576	0.781336	1.72e-06	0.710023	0.263565
rs2072107	30274914	rs2072107	logistic	1	2	30274914	1.13e-06	0.823648	1.33e-05	0.0025131	0.150937	0.000726303	0.382097	0.912643
rs2072109	30178254	rs2072109	logistic	1	2	30178254	2.03e-08	0.61956	4.39e-07	0.000109915	0.0186885	0.339441	0.229029	0.754493
rs2072110	30178157	rs2072110	logistic	1	2	30178157	5.13e-08	0.0290541	2.49e-06	7.7e-09	0.00355476	0.108178	0.0131545	0.920153
rs2072111	30472706	rs2072111	logistic	1	2	30472706	0.0429171	0.113212	0.577587	0.366412	0.293182	0.00577354	0.395352	0.760438
rs2072632	32029454	rs2072632	logistic	1	2	32029454	5.4e-43	0.00381987	1.3e-21	1.7e-14	2.92e-14	3.81e-08	0.00120075	0.789095
rs2072633	32027557	rs2072633	logistic	1	2	32027557	1.05e-08	0.0270636	0.00720929	0.0135	0.000218182	1.24e-06	0.429552	0.246229
rs2072894	29821015	rs2072894	logistic	1	2	29821015	2.97e-09	0.12505	9.12e-09	0.00449694	0.0638787	0.0422904	0.639628	0.872386
rs2073044	32446964	rs2073044	logistic	1	2	32446964	2.66e-22	0.0177273	1.01e-25	1.22e-10	4.49e-12	3.07e-14	0.0115911	0.0583191
rs2073046	32444052	rs2073046	logistic	1	2	32444052	0.00536218	0.267431	0.921021	0.80905	0.674028	1.37e-10	0.000157596	0.510049
rs2073048	32443411	rs2073048	logistic	1	2	32443411	1.31e-95	0.113147	1.97e-69	5.4e-43	6.77e-29	0.00573142	0.00450447	0.00895817
rs2073717	31230105	rs2073717	logistic	1	2	31230105	0.965893	0.451216	0.496009	0.601123	0.793109	0.638568	0.864195	0.470544
rs2073721	31237595	rs2073721	logistic	1	2	31237595	0.894084	0.721719	0.329971	0.166821	0.896332	0.0913844	0.131616	0.860411
rs2073723	31238057	rs2073723	logistic	1	2	31238057	0.894084	0.721719	0.329971	0.166821	0.896332	0.0913844	0.131616	0.860411
rs2073724	31237686	rs2073724	logistic	1	2	31237686	1.03e-06	0.77364	6.3e-11	2.78e-05	0.419734	0.82731	0.147723	0.37904
rs2074471	30264781	rs2074471	logistic	1	2	30264781	0.977408	0.263735	0.30014	0.190146	0.618379	0.135198	0.000804727	0.450743
rs2074472	30264475	rs2074472	logistic	1	2	30264475	1.2e-08	0.234038	6.24e-07	2.63e-08	0.253243	0.0323906	0.0098738	0.702066
rs2074473	30262178	rs2074473	logistic	1	2	30262178	2.5e-05	0.777747	0.00376916	0.00105895	0.291688	0.000313577	0.434345	0.165144
rs2074474	30417487	rs2074474	logistic	1	2	30417487	0.008521	0.443223	0.0850491	0.12879	0.0199947	0.328511	0.319102	0.355122
rs2074475	30245869	rs2074475	logistic	1	2	30245869	0.559397	0.119981	0.446894	0.155907	0.980797	0.116291	0.000274834	0.564922
rs2074476	30245842	rs2074476	logistic	1	2	30245842	0.528106	0.0661157	0.31012	0.254727	0.744871	0.204337	0.000920518	0.379673
rs2074477	30240014	rs2074477	logistic	1	2	30240014	0.00255551	0.314929	0.0327522	0.13481	0.00337077	0.505497	0.51061	0.379685
rs2074478	31213612	rs2074478	logistic	1	2	31213612	0.0109993	0.256976	0.0443588	0.00083915	0.272624	0.120131	3.52e-09	0.697912
rs2074479	30148988	rs2074479	logistic	1	2	30148988	3.26e-06	0.460901	4.08e-07	0.0275354	0.0277389	0.621838	0.209855	0.110431
rs2074480	30148789	rs2074480	logistic	1	2	30148789	3.26e-06	0.460901	4.08e-07	0.0275354	0.0277389	0.621838	0.209855	0.110431
rs2074482	30144450	rs2074482	logistic	1	2	30144450	3.01e-06	0.458876	4.21e-07	0.0278383	0.0245313	0.619833	0.210556	0.110765
rs2074483	30184734	rs2074483	logistic	1	2	30184734	0.000108616	0.155288	0.00345084	0.000152589	0.0405717	0.438369	0.0569193	0.895777
rs2074488	31348410	rs2074488	logistic	1	2	31348410	0.0167924	0.017115	0.159886	0.503981	0.00297783	0.000828652	0.0115639	0.709293
rs2074489	31348107	rs2074489	logistic	1	2	31348107	5.16e-05	0.0266447	6.93e-07	0.0141141	0.0432457	0.0212345	0.00265843	0.789358
rs2074502	30492301	rs2074502	logistic	1	2	30492301	6.85e-19	0.732443	4.52e-13	2.62e-05	1.56e-07	0.20306	4.67e-06	0.940485
rs2074503	30638475	rs2074503	logistic	1	2	30638475	0.182733	0.290093	0.849743	0.66873	0.149912	0.258348	0.0414608	0.0597121
rs2074504	30638224	rs2074504	logistic	1	2	30638224	0.0261923	0.315317	0.36376	0.260816	0.0525826	0.252582	0.053639	0.0592636
rs2074505	30629116	rs2074505	logistic	1	2	30629116	0.612667	0.435173	0.637597	0.697336	0.41941	0.438997	0.0344409	0.0503784
rs2074506	30998462	rs2074506	logistic	1	2	30998462	1.54e-06	0.601617	9.21e-05	0.00225655	0.127464	0.104672	1.48e-05	0.690685
rs2075015	30788587	rs2075015	logistic	1	2	30788587	0.116286	0.767182	0.625451	0.865063	0.00201214	0.214433	0.489872	0.98242
rs2075580	31611954	rs2075580	logistic	1	2	31611954	4.13e-05	0.251196	0.0274798	0.0213708	0.12902	0.816539	2.19e-05	0.10569
rs2075788	31820160	rs2075788	logistic	1	2	31820160	6.61e-28	0.386968	1.41e-17	2.93e-11	2.63e-09	0.116653	6.28e-06	0.065695
rs2075789	31816307	rs2075789	logistic	1	2	31816307	1.12e-30	0.189061	7.51e-20	3.48e-12	1.69e-09	0.0453861	3.39e-10	0.00306192
rs2075799	31886508	rs2075799	logistic	1	2	31886508	4.74e-12	0.0330813	1.77e-09	0.000635901	0.00187521	0.726591	0.0834065	0.787541
rs2075800	31885925	rs2075800	logistic	1	2	31885925	3.4e-18	0.163322	5.77e-08	5.34e-06	7.14e-07	1.35e-06	0.000293016	0.294064
rs2075801	31836246	rs2075801	logistic	1	2	31836246	2.83e-28	0.350021	3.48e-18	2.08e-11	3.87e-09	0.109144	5.54e-06	0.0626852
rs2076177	29801092	rs2076177	logistic	1	2	29801092	3.09e-07	0.681295	2.1e-07	0.00236478	0.150764	0.0703349	0.617784	0.554431
rs2076311	33253347	rs2076311	logistic	1	2	33253347	2.73e-06	0.771535	1.53e-12	1.9e-05	0.331695	0.23367	0.100344	0.859677
rs2076312	33250140	rs2076312	logistic	1	2	33250140	0.0177129	0.0521917	2.16e-06	0.00052425	0.032107	0.513886	0.256564	0.252414
rs2076485	29631931	rs2076485	logistic	1	2	29631931	0.804233	0.813179	0.836171	0.591894	0.435282	0.984244	0.157044	0.25011
rs2076522	32479157	rs2076522	logistic	1	2	32479157	3.09e-65	0.00526996	1.28e-58	1e-20	1.88e-29	4.65e-12	0.50309	0.0725224
rs2076523	32478813	rs2076523	logistic	1	2	32478813	0.596817	0.0268347	0.293438	0.464715	0.00736339	1.19e-11	0.443758	0.706979
rs2076525	32478594	rs2076525	logistic	1	2	32478594	2.36e-65	0.00518532	1.08e-58	9.39e-21	1.68e-29	4.8e-12	0.500784	0.0721015
rs2076529	32471933	rs2076529	logistic	1	2	32471933	5.57e-24	0.000626168	2.28e-27	1.27e-07	8.88e-12	1.35e-10	0.039599	0.129557
rs2076530	32471794	rs2076530	logistic	1	2	32471794	3.75e-23	0.0016206	1.66e-26	5.2e-07	6.02e-12	3.3e-10	0.0470589	0.108428
rs2076537	32425613	rs2076537	logistic	1	2	32425613	5.38e-30	0.37331	5.67e-27	1.11e-11	1.65e-12	0.155812	0.14516	0.105808
rs2076538	32425449	rs2076538	logistic	1	2	32425449	0.00524907	0.26647	0.924498	0.80688	0.670992	1.35e-10	0.000156433	0.509283
rs2076540	32425254	rs2076540	logistic	1	2	32425254	0.00074401	0.261225	0.717954	0.559426	0.51418	1.43e-11	6.37e-05	0.490807
rs2076541	32425193	rs2076541	logistic	1	2	32425193	0.00506063	0.264895	0.93048	0.803021	0.665802	1.32e-10	0.000154837	0.507947
rs2076542	32425105	rs2076542	logistic	1	2	32425105	0.00506063	0.264895	0.93048	0.803021	0.665802	1.32e-10	0.000154837	0.507947
rs2077102	31719819	rs2077102	logistic	1	2	31719819	7.89e-19	0.330926	1.88e-11	3.35e-11	0.0018608	0.000325986	9.85e-06	0.0736691
rs2077573	30536330	rs2077573	logistic	1	2	30536330	0.0160569	0.42213	9.92e-05	0.797041	0.0246004	0.0285229	0.355052	0.98911
rs2082261	33098484	rs2082261	logistic	1	2	33098484	0.747739	0.983142	0.0978244	0.566051	0.0207676	0.576793	0.53154	0.522142
rs209473	33030886	rs209473	logistic	1	2	33030886	0.0185709	0.172186	0.0333118	0.948614	0.384578	0.366248	0.810308	0.0626319
rs209474	33032562	rs209474	logistic	1	2	33032562	2.32e-11	0.0413116	0.000375766	0.00253194	4.07e-06	0.040273	0.233381	0.010409
rs209475	33033563	rs209475	logistic	1	2	33033563	4.96e-15	0.0657915	4.25e-05	6.96e-05	2.47e-07	0.0227656	0.0217098	0.00198304
rs2097431	32698811	rs2097431	logistic	1	2	32698811	1.21e-23	0.130075	7.75e-17	4.5e-10	4.25e-12	0.218913	0.00130171	0.235196
rs2097773	30348905	rs2097773	logistic	1	2	30348905	0.00909836	0.43053	0.104018	0.114608	0.0219662	0.331109	0.285704	0.230824
rs2105902	32503676	rs2105902	logistic	1	2	32503676	0.98965	0.136548	0.0572891	0.367566	0.672947	0.0399315	0.0048082	0.986882
rs2105961	30523615	rs2105961	logistic	1	2	30523615	0.000535456	0.373917	0.000138558	0.421419	0.0484045	0.555435	0.11998	0.462862
rs2105963	30452269	rs2105963	logistic	1	2	30452269	0.040421	0.873777	0.0107845	0.0828036	0.913058	0.680951	0.408956	0.876017
rs2106067	31156242	rs2106067	logistic	1	2	31156242	1.37e-14	0.742174	9.59e-13	5.37e-09	0.0124496	0.450116	0.000235792	0.254203
rs2106070	30294842	rs2106070	logistic	1	2	30294842	4.88e-06	0.719585	0.000352404	0.00118906	0.33176	0.000282678	0.294944	0.126403
rs2106072	30261342	rs2106072	logistic	1	2	30261342	0.417834	0.163329	0.429821	0.00332107	0.827667	0.0102112	0.00586383	0.605671
rs2106074	31241488	rs2106074	logistic	1	2	31241488	0.0079138	0.558781	2.82e-06	0.215826	0.823962	0.186988	0.571596	0.678354
rs2107202	30213722	rs2107202	logistic	1	2	30213722	1.56e-36	0.0880318	2.51e-22	5.73e-11	7.21e-10	0.00135494	3.05e-05	0.447782
rs2107203	29777809	rs2107203	logistic	1	2	29777809	0.0518597	0.027013	0.215253	0.00334557	0.287101	0.493153	0.00273367	0.921514
rs2108691	30056344	rs2108691	logistic	1	2	30056344	8.13e-14	0.806311	1.09e-09	1.03e-05	3.15e-05	0.824567	0.19238	0.059789
rs2114436	32343362	rs2114436	logistic	1	2	32343362	0.0153692	0.615101	0.12181	0.00464418	0.892801	0.326574	0.0409196	0.751705
rs2116264	33092766	rs2116264	logistic	1	2	33092766	9.74e-18	0.550205	6.76e-12	3.2e-10	9.18e-09	0.957635	0.711576	0.593382
rs2127676	32957819	rs2127676	logistic	1	2	32957819	2.21e-10	0.0474447	5.18e-10	0.0130027	0.000648178	0.923159	0.325355	0.575656
rs2127679	32926213	rs2127679	logistic	1	2	32926213	1.98e-25	0.443201	1.9e-25	1.83e-08	6.73e-07	0.472222	0.314934	0.0332075
rs2127680	32926009	rs2127680	logistic	1	2	32926009	4.01e-25	0.465734	4.73e-25	1.09e-08	1e-06	0.495594	0.328215	0.0351445
rs2142234	31747108	rs2142234	logistic	1	2	31747108	0.149303	0.508004	0.40127	0.133713	0.0132162	0.545564	0.34389	0.0231429
rs2143461	32443325	rs2143461	logistic	1	2	32443325	0.00715175	0.772634	0.192352	0.051766	0.680431	0.00148607	0.00382458	0.948032
rs2143462	32443182	rs2143462	logistic	1	2	32443182	0.00195534	0.968453	0.180291	0.0215668	0.381811	0.000952952	0.00344309	0.850481
rs2143465	32417330	rs2143465	logistic	1	2	32417330	0.00519068	0.265707	0.927262	0.805055	0.668231	1.35e-10	0.00015698	0.509552
rs2143466	32417301	rs2143466	logistic	1	2	32417301	0.00485025	0.30346	0.961222	0.971067	0.484306	1.56e-10	0.00058992	0.556623
rs2143468	32416981	rs2143468	logistic	1	2	32416981	0.0136782	0.312474	0.790686	0.970584	0.812964	3.57e-10	0.000219289	0.495657
rs2156875	31425326	rs2156875	logistic	1	2	31425326	0.0290944	0.481286	0.0074731	0.461936	0.147915	0.000183817	1.23e-10	0.890683
rs2157079	32870081	rs2157079	logistic	1	2	32870081	6.75e-79	0.239406	6.58e-50	8.91e-22	2.28e-34	0.80667	0.00482212	0.000163757
rs2157327	32827469	rs2157327	logistic	1	2	32827469	1.7e-37	0.861666	3.34e-21	3.15e-11	8.13e-18	0.0875926	0.00139919	0.00557772
rs2157338	32547301	rs2157338	logistic	1	2	32547301	1.25e-61	0.0693662	1.28e-67	2.54e-24	7.78e-17	0.00783364	0.520664	0.228263
rs2157605	30562055	rs2157605	logistic	1	2	30562055	1.26e-23	0.819869	6.05e-17	2.76e-07	5.01e-09	0.327666	2.19e-07	0.684845
rs2157678	30236928	rs2157678	logistic	1	2	30236928	0.222357	0.168343	0.21249	0.00302063	0.675627	0.0123529	0.00768903	0.544972
rs2158285	30439006	rs2158285	logistic	1	2	30439006	0.02536	0.654434	0.00670242	0.0853208	0.850503	0.741345	0.412631	0.871843
rs2158286	30438973	rs2158286	logistic	1	2	30438973	0.0475587	0.904058	0.0140555	0.0814488	0.89254	0.569731	0.381555	0.902738
rs2158287	30314705	rs2158287	logistic	1	2	30314705	5.55e-20	0.0511661	3.94e-10	0.000767276	1.23e-07	0.0157964	0.0234267	0.193553
rs2170185	32957617	rs2170185	logistic	1	2	32957617	2.13e-10	0.053436	3.29e-10	0.0195386	0.00069833	0.989513	0.3626	0.545849
rs2179919	33167240	rs2179919	logistic	1	2	33167240	1.48e-07	0.00962218	2.55e-13	6.42e-05	0.171221	0.000401276	0.0279248	0.583164
rs2179920	33166852	rs2179920	logistic	1	2	33166852	0.00180292	0.00762756	8.59e-10	0.00320434	0.00433662	0.00869429	0.0612005	0.966658
rs2187668	32713862	rs2187668	logistic	1	2	32713862	0.00381816	0.240424	0.479333	0.00556444	0.0796789	0.21034	0.00128227	0.323329
rs2187685	32872293	rs2187685	logistic	1	2	32872293	1.42e-53	0.602788	1.22e-32	1.26e-12	4.49e-26	0.136783	0.00390378	0.000270766
rs2187688	32979979	rs2187688	logistic	1	2	32979979	5.12e-13	0.0659139	1.14e-11	0.00863391	0.000687131	0.0703205	0.966221	0.720467
rs2187689	32960625	rs2187689	logistic	1	2	32960625	0.662101	0.88298	0.703672	0.348773	0.954051	0.134239	0.476628	0.486091
rs2187818	32503546	rs2187818	logistic	1	2	32503546	0.405542	0.0167654	0.00701128	0.0284159	0.262796	9.32e-15	0.829237	0.512455
rs2187820	32493851	rs2187820	logistic	1	2	32493851	0.000497061	0.16285	3.77e-06	0.147927	0.026327	0.00403815	0.0287057	0.571695
rs2187823	32547486	rs2187823	logistic	1	2	32547486	1.05e-61	0.0688868	1.11e-67	2.41e-24	7.36e-17	0.00788453	0.521981	0.227543
rs2187974	30533316	rs2187974	logistic	1	2	30533316	0.000359304	0.153235	0.000262044	0.562552	0.0372453	0.449068	0.253187	0.714072
rs2187978	30470940	rs2187978	logistic	1	2	30470940	0.0456687	0.938716	0.0121962	0.0778793	0.917006	0.61892	0.398717	0.885497
rs2188099	30317897	rs2188099	logistic	1	2	30317897	0.709937	0.341413	0.241033	0.0222648	0.597145	0.0135124	0.0525506	0.214489
rs2188100	30289862	rs2188100	logistic	1	2	30289862	0.256701	0.274786	0.0554744	0.009101	0.938435	0.0150778	0.0428029	0.124024
rs2199870	32881150	rs2199870	logistic	1	2	32881150	5.1e-79	0.268442	5.89e-50	5.12e-22	2.09e-34	0.802916	0.00476366	0.000161867
rs2199874	32877904	rs2199874	logistic	1	2	32877904	7.48e-29	0.773691	1.31e-18	5.48e-13	6.9e-13	0.313553	0.0476788	0.0139754
rs2206618	32432522	rs2206618	logistic	1	2	32432522	1.72e-60	0.40112	7.36e-47	6.67e-24	2.91e-20	0.170303	0.197309	0.0234005
rs2213565	32821166	rs2213565	logistic	1	2	32821166	3.03e-36	0.81806	7.06e-26	1.76e-12	1.07e-17	0.367623	0.661644	0.0190341
rs2213567	32819633	rs2213567	logistic	1	2	32819633	2.78e-37	0.793352	2.29e-21	2.05e-11	3.8e-17	0.137604	0.000960416	0.00441852
rs2213571	32827915	rs2213571	logistic	1	2	32827915	6.37e-38	0.803248	3.17e-21	3.14e-11	4.27e-18	0.0877189	0.00096556	0.00557032
rs2213572	32827782	rs2213572	logistic	1	2	32827782	1.54e-37	0.806448	3.56e-21	3.24e-11	8.58e-18	0.0881313	0.00140914	0.0056066
rs2213573	32824000	rs2213573	logistic	1	2	32824000	1.37e-35	0.620394	2.26e-25	2.2e-12	6.28e-18	0.314909	0.618431	0.0168133
rs2213580	32496552	rs2213580	logistic	1	2	32496552	0.000458953	0.16285	3.77e-06	0.147927	0.026327	0.00557984	0.0287057	0.571695
rs2213585	32521128	rs2213585	logistic	1	2	32521128	1.13e-14	0.316528	1.11e-26	2.84e-09	0.00353748	4.75e-08	0.0463122	0.489911
rs2213586	32521072	rs2213586	logistic	1	2	32521072	9.86e-15	0.316528	1.11e-26	2.84e-09	0.00353748	7.37e-08	0.0463122	0.489911
rs2227127	32819760	rs2227127	logistic	1	2	32819760	9.36e-68	0.0123875	2.04e-46	8.07e-16	5.58e-25	0.000644872	0.181639	0.000322771
rs2227139	32521437	rs2227139	logistic	1	2	32521437	9.81e-15	0.319204	1.27e-26	2.99e-09	0.00325573	7.21e-08	0.0459437	0.487986
rs2227955	31886056	rs2227955	logistic	1	2	31886056	0.000477733	0.147504	0.000757221	0.000372502	0.300833	0.392452	0.0638291	0.409774
rs2227956	31886251	rs2227956	logistic	1	2	31886251	2.64e-35	0.0439263	4.01e-18	1.15e-10	4.71e-11	3.76e-05	0.000671995	0.626766
rs2228396	32905786	rs2228396	logistic	1	2	32905786	0.0225257	0.456902	0.065873	0.152304	0.736503	3.08e-06	0.406729	0.20094
rs2228397	32908201	rs2228397	logistic	1	2	32908201	0.129019	0.851123	0.00799087	0.542665	0.526044	0.208846	0.227035	0.588258
rs2228628	32196832	rs2228628	logistic	1	2	32196832	6.7e-68	0.00547485	1.75e-39	4.12e-23	6.13e-22	3.79e-07	9.51e-06	0.323612
rs2229092	31648736	rs2229092	logistic	1	2	31648736	1.46e-08	0.0575799	2.09e-07	0.254608	1.63e-06	0.981715	0.77109	0.136976
rs2229094	31648535	rs2229094	logistic	1	2	31648535	0.549538	0.183892	0.682103	0.234572	0.526852	0.768451	0.000623441	0.613078
rs2229792	33239479	rs2229792	logistic	1	2	33239479	0.687225	0.0785647	0.335388	0.689859	0.253014	0.697076	0.656914	0.335396
rs2230365	31633427	rs2230365	logistic	1	2	31633427	0.00542672	0.664867	0.156655	0.943069	4.3e-06	0.271589	0.0675766	0.0445539
rs2232238	30050836	rs2232238	logistic	1	2	30050836	4e-13	0.999101	2.09e-10	1.25e-05	0.000137397	0.23264	0.720912	0.332732
rs2232239	30050845	rs2232239	logistic	1	2	30050845	0.0170274	0.991768	0.011934	0.365257	0.477941	0.188519	0.400545	0.356387
rs2233945	31215340	rs2233945	logistic	1	2	31215340	0.963526	0.194472	0.676804	0.360799	0.935686	0.163112	0.0428197	0.278008
rs2233950	31214044	rs2233950	logistic	1	2	31214044	0.000690156	0.442875	0.0230743	0.123131	0.102226	0.108767	0.0179736	0.85718
rs2233952	31213870	rs2233952	logistic	1	2	31213870	0.331428	0.592606	0.111688	0.0803025	0.58828	0.118179	9.52e-14	0.871723
rs2233954	31213651	rs2233954	logistic	1	2	31213651	0.0727193	0.105858	0.197279	0.0111804	0.59343	0.708435	0.712923	0.396888
rs2233956	31189184	rs2233956	logistic	1	2	31189184	1.54e-06	0.00560039	4.52e-08	2.25e-07	0.28119	0.5709	2.1e-05	0.0551101
rs2233965	31188878	rs2233965	logistic	1	2	31188878	8.45e-07	0.321794	0.00531591	0.000988455	0.177781	0.0459557	1.73e-13	0.806749
rs2233966	31188838	rs2233966	logistic	1	2	31188838	3.42e-14	0.0691285	1.47e-10	8.35e-05	0.00442037	0.00644098	0.0894093	0.785723
rs2233967	31188807	rs2233967	logistic	1	2	31188807	5.69e-07	0.317531	0.00440012	0.00056455	0.186649	0.0451977	1.68e-13	0.81019
rs2233974	31187995	rs2233974	logistic	1	2	31187995	0.174725	0.343824	0.169042	0.0179434	0.63157	0.0335763	6.84e-05	0.38557
rs2233976	31187973	rs2233976	logistic	1	2	31187973	6.74e-19	0.569273	9.12e-23	1.55e-11	0.00194752	0.359957	0.210406	0.964126
rs2233982	31187419	rs2233982	logistic	1	2	31187419	0.801679	0.315592	0.16577	0.156674	0.485735	0.219791	0.0639577	0.677828
rs2233984	31187243	rs2233984	logistic	1	2	31187243	2.4e-19	0.338256	1.23e-09	5.76e-05	9.6e-06	0.124047	7.01e-30	0.796604
rs2235383	29801478	rs2235383	logistic	1	2	29801478	2.95e-07	0.685433	2.22e-07	0.00242182	0.139538	0.0710825	0.615056	0.556439
rs2235498	33238408	rs2235498	logistic	1	2	33238408	2.78e-27	0.695914	1.91e-20	4.49e-13	3.4e-07	0.000494592	0.296066	0.870436
rs2239514	30685771	rs2239514	logistic	1	2	30685771	0.162765	0.821884	0.461799	0.978275	0.0452303	0.301142	0.83274	0.47541
rs2239515	30685945	rs2239515	logistic	1	2	30685945	0.16439	0.819251	0.545404	0.978289	0.0330884	0.301888	0.833163	0.473572
rs2239516	30686027	rs2239516	logistic	1	2	30686027	0.186689	0.819204	0.546748	0.977472	0.0455473	0.303151	0.83211	0.473326
rs2239520	31196901	rs2239520	logistic	1	2	31196901	0.0179217	0.0676625	0.672496	0.750988	0.219448	0.0142889	0.0354864	0.686717
rs2239524	31233548	rs2239524	logistic	1	2	31233548	0.929894	0.502322	0.609107	0.610875	0.867715	0.675589	0.852836	0.514429
rs2239525	31617351	rs2239525	logistic	1	2	31617351	1.37e-05	0.180034	0.0165442	0.0203827	0.106663	0.737388	1.67e-05	0.0940803
rs2239526	31617411	rs2239526	logistic	1	2	31617411	1.45e-05	0.181367	0.016934	0.0206626	0.108457	0.740373	1.68e-05	0.0944347
rs2239528	31618084	rs2239528	logistic	1	2	31618084	1.32e-05	0.181367	0.0152746	0.0206626	0.108457	0.740373	1.68e-05	0.0944347
rs2239529	30186309	rs2239529	logistic	1	2	30186309	0.0643114	0.172202	0.0263617	0.000153409	0.313217	0.00157893	0.842106	0.884012
rs2239530	30260094	rs2239530	logistic	1	2	30260094	2.03e-23	0.229325	2.06e-17	6.3e-14	0.000182324	0.0102837	2.21e-05	0.28159
rs2239531	30276808	rs2239531	logistic	1	2	30276808	0.00150344	0.319955	0.02651	0.174795	0.00141446	0.496205	0.482048	0.349283
rs2239689	32138262	rs2239689	logistic	1	2	32138262	1.23e-46	0.00300003	6.61e-24	4.61e-16	3.46e-15	9.16e-09	0.000939902	0.766471
rs2239701	32913027	rs2239701	logistic	1	2	32913027	0.200391	0.570491	0.528616	0.380599	0.276509	0.00892186	0.0250093	0.999654
rs2239704	31648120	rs2239704	logistic	1	2	31648120	5.05e-15	0.00501048	2.21e-08	0.0021543	0.000256958	0.0139325	0.00699525	0.302434
rs2239705	31621381	rs2239705	logistic	1	2	31621381	0.00240261	0.0941928	0.00869468	0.901588	0.0443541	0.0107643	0.123529	0.557051
rs2239707	31633298	rs2239707	logistic	1	2	31633298	4.83e-06	0.17001	0.00302364	0.000994842	0.566801	0.810891	1.15e-05	0.000890701
rs2239709	31615426	rs2239709	logistic	1	2	31615426	4.57e-06	0.338627	0.000789799	0.00619407	0.000111481	0.714001	0.104605	0.938308
rs2239802	32519824	rs2239802	logistic	1	2	32519824	6.18e-10	0.690737	1.44e-16	1.24e-07	0.0389631	0.000630202	0.869929	0.556543
rs2239803	32519811	rs2239803	logistic	1	2	32519811	1.69e-13	0.512831	3.8e-22	3.51e-09	0.00276964	5.08e-09	0.442758	0.79721
rs2239804	32519501	rs2239804	logistic	1	2	32519501	1.02e-11	0.528645	6.31e-20	5.16e-08	0.00646291	2.62e-08	0.674545	0.990095
rs2239805	32519354	rs2239805	logistic	1	2	32519354	0.00629734	0.206519	1.21e-05	0.0997332	0.206006	0.00120232	0.00698574	0.882411
rs2239806	32519285	rs2239806	logistic	1	2	32519285	0.00177831	0.0909734	3.74e-06	0.0711212	0.140833	0.00158733	0.00800955	0.820039
rs2240058	30418479	rs2240058	logistic	1	2	30418479	0.14648	0.478859	0.286681	0.258034	0.360771	0.467502	0.434675	0.74464
rs2240059	31228593	rs2240059	logistic	1	2	31228593	0.930406	0.795801	0.25034	0.196561	0.74039	0.104187	0.122632	0.985355
rs2240062	31222741	rs2240062	logistic	1	2	31222741	0.0488833	0.4992	0.644473	0.0981322	0.494338	0.347214	0.00431769	0.587976
rs2240064	31222552	rs2240064	logistic	1	2	31222552	0.453952	0.556152	0.0983613	0.772816	0.902988	0.547947	0.494711	0.508661
rs2240066	31222314	rs2240066	logistic	1	2	31222314	2.2e-10	0.673605	0.00297583	0.136786	0.000793796	0.201338	3.05e-37	0.31949
rs2240068	30184609	rs2240068	logistic	1	2	30184609	2.47e-19	0.638605	2.93e-12	9.62e-12	2.91e-05	0.0897675	0.000171943	0.236974
rs2240069	30183620	rs2240069	logistic	1	2	30183620	7.87e-13	0.187276	1.44e-08	7.88e-06	0.00394851	0.229795	0.0106159	0.339788
rs2240070	30179089	rs2240070	logistic	1	2	30179089	1.09e-06	0.075002	1.91e-05	1.75e-05	0.0854573	0.645073	0.043394	0.170652
rs2240071	30178911	rs2240071	logistic	1	2	30178911	9.46e-07	0.0779679	1.45e-05	3.07e-08	0.0249685	0.259171	0.0496001	0.952665
rs2240619	30083432	rs2240619	logistic	1	2	30083432	5.15e-10	0.0290637	7.69e-10	8.87e-08	0.0842018	0.304054	0.0290659	0.235991
rs2240804	31028869	rs2240804	logistic	1	2	31028869	1.57e-08	0.529579	1.6e-05	0.000408491	0.0258867	0.0559181	4.37e-06	0.878
rs2242653	31783744	rs2242653	logistic	1	2	31783744	1.27e-16	0.208974	2.33e-10	2.59e-09	0.000863736	0.00191941	0.000231952	0.103528
rs2242655	31735428	rs2242655	logistic	1	2	31735428	8.67e-19	0.284891	1.14e-11	2.96e-11	0.00203183	0.000477849	9.45e-06	0.0724009
rs2242656	31722081	rs2242656	logistic	1	2	31722081	1.92e-26	0.0339765	1.95e-11	1.33e-09	1.28e-07	0.000581005	0.000142884	0.0105769
rs2242657	31710468	rs2242657	logistic	1	2	31710468	3.08e-18	0.259742	2.83e-11	3.2e-11	0.00304044	0.000394334	1.16e-05	0.0779763
rs2242659	31709492	rs2242659	logistic	1	2	31709492	0.00148322	0.837134	0.0016088	0.0669764	0.712192	0.0479811	0.68011	0.0880319
rs2242660	31705732	rs2242660	logistic	1	2	31705732	0.00233219	0.708399	0.00237266	0.118696	0.694122	0.0360459	0.783221	0.179414
rs2242664	31947310	rs2242664	logistic	1	2	31947310	0.00636506	0.916738	0.141615	0.0377173	0.10234	0.101632	0.050809	0.135562
rs2242665	31947288	rs2242665	logistic	1	2	31947288	0.00590611	0.915346	0.140653	0.0375181	0.0942193	0.101329	0.0506902	0.135843
rs2242668	31881800	rs2242668	logistic	1	2	31881800	2.41e-11	0.0427321	4.9e-09	0.00314327	0.000942901	0.798466	0.0910569	0.611608
rs2243621	31539799	rs2243621	logistic	1	2	31539799	6.07e-10	0.479142	2.97e-10	2.99e-08	0.0472266	0.0035407	0.0245389	0.472349
rs2243868	31369255	rs2243868	logistic	1	2	31369255	9.82e-10	0.315187	7.11e-07	2.66e-05	0.0149026	0.22041	2.37e-10	0.177928
rs2244546	31543812	rs2244546	logistic	1	2	31543812	0.0180012	0.448778	0.174084	0.166584	0.209409	1.68e-05	0.00801837	0.766555
rs2244578	31544588	rs2244578	logistic	1	2	31544588	0.850226	0.775371	0.795939	0.232005	0.0603396	0.0561764	2.75e-17	0.955627
rs2244579	31544618	rs2244579	logistic	1	2	31544618	0.000166353	0.266317	0.0407793	0.454984	0.0423409	0.0336019	0.00813315	0.115114
rs2244839	31546347	rs2244839	logistic	1	2	31546347	0.000162768	0.270536	0.0429927	0.463389	0.0330927	0.0343732	0.00833066	0.15856
rs2245420	30190667	rs2245420	logistic	1	2	30190667	0.0418316	0.140681	0.0192406	6.16e-05	0.331659	0.00303755	0.733784	0.983793
rs2245507	30540287	rs2245507	logistic	1	2	30540287	0.00257845	0.272346	0.0533239	0.0844607	0.110395	0.0401793	0.152128	0.309651
rs2245514	30540434	rs2245514	logistic	1	2	30540434	3.96e-28	0.171811	5.89e-17	1.12e-07	2.45e-08	0.000390657	0.000890333	0.321883
rs2245822	31338779	rs2245822	logistic	1	2	31338779	1.45e-05	0.0879751	8.64e-07	0.000413111	0.272903	0.767915	2.23e-07	0.0301002
rs2245961	30051983	rs2245961	logistic	1	2	30051983	1.66e-45	0.0318784	2.42e-34	5.66e-14	1.04e-11	0.0101117	0.173808	0.133825
rs2246198	30053581	rs2246198	logistic	1	2	30053581	1.42e-17	0.76156	8.07e-15	0.000152294	1.04e-05	0.488245	0.0354606	0.0343634
rs2246199	30053599	rs2246199	logistic	1	2	30053599	3.57e-18	0.659367	4.18e-14	0.000114989	8.91e-07	0.917898	0.0559849	0.0634054
rs2246618	31586965	rs2246618	logistic	1	2	31586965	2.49e-07	0.0239031	4.81e-06	0.678187	0.00132923	0.000138798	2.06e-05	0.868774
rs2246638	30057476	rs2246638	logistic	1	2	30057476	4.3e-15	0.834661	1.58e-11	1.18e-05	6.16e-05	0.335009	0.102804	0.0292022
rs2246642	30057497	rs2246642	logistic	1	2	30057497	8.62e-14	0.803715	1.11e-09	1.04e-05	3.21e-05	0.826747	0.192871	0.0598927
rs2246871	31589125	rs2246871	logistic	1	2	31589125	5.78e-57	0.0125956	1.23e-33	1.73e-15	3.65e-16	0.000151616	2.83e-06	0.246656
rs2246954	31373241	rs2246954	logistic	1	2	31373241	5.54e-08	0.106648	2.76e-06	0.00042477	0.0728517	0.130753	1.96e-10	0.200692
rs2247056	31373469	rs2247056	logistic	1	2	31373469	0.0656685	0.252488	0.385076	0.00411007	0.488331	0.108022	4.55e-07	0.85024
rs2247178	31024697	rs2247178	logistic	1	2	31024697	0.00389999	0.712604	0.0892652	0.00685311	0.149647	0.601553	0.512691	0.410834
rs2248289	30180700	rs2248289	logistic	1	2	30180700	2.44e-07	0.0249587	2.02e-06	4.44e-08	0.0128691	0.121655	0.0154721	0.811083
rs2248372	31554445	rs2248372	logistic	1	2	31554445	0.717971	0.465876	0.0498469	0.803267	0.213161	0.0589077	1.45e-19	0.17457
rs2248462	31554775	rs2248462	logistic	1	2	31554775	0.0118418	0.638179	0.000116167	0.0587719	0.00754175	0.023065	1.15e-28	0.0844837
rs2248613	31556411	rs2248613	logistic	1	2	31556411	2.86e-12	0.0984396	3.62e-08	0.00441576	1e-05	8.35e-07	1.32e-06	0.957466
rs2248617	31556512	rs2248617	logistic	1	2	31556512	3.23e-12	0.0988164	3.76e-08	0.00452154	1.07e-05	8.83e-07	1.3e-06	0.958517
rs2248880	31341489	rs2248880	logistic	1	2	31341489	1.58e-05	0.0879751	8.64e-07	0.000413111	0.290255	0.767915	2.23e-07	0.0301002
rs2249099	30187286	rs2249099	logistic	1	2	30187286	0.0406576	0.144024	0.0204365	5.83e-05	0.32092	0.00315887	0.727402	0.989685
rs2249168	31066233	rs2249168	logistic	1	2	31066233	0.0864852	0.519491	0.25204	0.845343	0.0244123	0.0313582	0.000477897	0.833302
rs2249231	31151211	rs2249231	logistic	1	2	31151211	1.93e-15	0.760609	2.1e-13	3.53e-09	0.00451802	0.546926	0.000283601	0.263192
rs2249464	30996140	rs2249464	logistic	1	2	30996140	3.2e-07	0.851253	0.000274137	0.00152161	0.00767943	0.579493	2.43e-06	0.836986
rs2249742	31348700	rs2249742	logistic	1	2	31348700	0.141314	0.882791	0.142064	0.137423	0.524367	0.00617477	1.64e-10	0.427953
rs2250264	30929166	rs2250264	logistic	1	2	30929166	8.8e-10	0.879602	5.28e-07	2.41e-05	0.2765	0.12337	5.24e-09	0.462022
rs2251396	31472686	rs2251396	logistic	1	2	31472686	0.174385	0.417809	0.997472	0.33006	0.769345	1.43e-07	6e-05	0.653429
rs2251765	30438320	rs2251765	logistic	1	2	30438320	0.0522062	0.901905	0.0177862	0.0807686	0.88764	0.571313	0.380442	0.903787
rs2251824	31619836	rs2251824	logistic	1	2	31619836	0.0110941	0.348042	0.186396	0.529548	0.00475748	0.0174082	0.0637016	0.195517
rs2251830	31124957	rs2251830	logistic	1	2	31124957	0.011386	0.114042	0.00583193	0.0327124	0.228085	0.00714312	4.59e-07	0.874674
rs2252711	29734300	rs2252711	logistic	1	2	29734300	1.86e-31	0.631742	3.21e-21	3.44e-16	9.42e-09	0.0308369	0.00116803	0.0122351
rs2252745	30687294	rs2252745	logistic	1	2	30687294	0.362122	0.147679	0.87637	0.901102	0.243958	0.341485	0.023872	0.0730396
rs2252760	31000356	rs2252760	logistic	1	2	31000356	9.69e-07	0.66105	8.63e-05	0.00218997	0.107096	0.102777	8.99e-06	0.690269
rs2252856	31001230	rs2252856	logistic	1	2	31001230	1.54e-06	0.601617	9.21e-05	0.00225655	0.127464	0.104672	1.48e-05	0.690685
rs2252926	31074283	rs2252926	logistic	1	2	31074283	0.0796643	0.527452	0.225108	0.832308	0.0259584	0.0243282	0.000460255	0.827213
rs2253044	31569904	rs2253044	logistic	1	2	31569904	2.19e-31	0.03549	1.82e-21	3.77e-07	4.23e-09	5.3e-05	0.189172	0.276437
rs2253163	30317041	rs2253163	logistic	1	2	30317041	1.96e-08	0.294575	1.58e-06	1.48e-07	0.180095	0.0261126	0.00712422	0.820047
rs2253417	31078438	rs2253417	logistic	1	2	31078438	0.0849021	0.517004	0.249243	0.849255	0.0239779	0.0311519	0.000480613	0.833371
rs2253588	31007356	rs2253588	logistic	1	2	31007356	5.52e-11	0.0934385	1.75e-06	0.0309973	0.00220135	0.0416464	0.00118441	0.0165813
rs2253705	31008073	rs2253705	logistic	1	2	31008073	1.91e-09	0.312871	0.000253209	0.0452384	0.000555569	0.0328911	0.000472756	0.0194014
rs2253907	31444849	rs2253907	logistic	1	2	31444849	0.00362903	0.0694783	0.215341	0.0850584	0.0103461	2.17e-06	2.99e-13	0.390899
rs2253908	31444870	rs2253908	logistic	1	2	31444870	1e-07	0.29982	4.43e-05	0.0018808	0.000966539	0.00186207	3.05e-06	0.220132
rs2254287	33251926	rs2254287	logistic	1	2	33251926	0.0218752	0.46567	1.75e-05	0.0018492	0.0240165	0.813387	0.855979	0.520958
rs2254386	31533012	rs2254386	logistic	1	2	31533012	1.11e-05	0.513703	0.030472	0.0249285	0.202496	0.571399	5.34e-13	0.198256
rs2254847	31041827	rs2254847	logistic	1	2	31041827	0.275821	0.497946	0.715638	0.076465	0.839556	0.618882	0.88315	0.64229
rs2255221	31539670	rs2255221	logistic	1	2	31539670	5.53e-28	0.0211308	6.01e-17	3.82e-05	3.02e-09	0.00122424	0.238662	0.116289
rs2255625	31048684	rs2255625	logistic	1	2	31048684	0.0595993	0.466362	0.196526	0.885471	0.0207215	0.0252106	0.000437167	0.822372
rs2255719	31049264	rs2255719	logistic	1	2	31049264	0.0595993	0.466362	0.196526	0.885471	0.0207215	0.0252106	0.000437167	0.822372
rs2255798	31629281	rs2255798	logistic	1	2	31629281	0.0138673	0.903514	0.357084	0.926509	0.000274949	0.00138743	0.160415	0.115571
rs2256028	31487177	rs2256028	logistic	1	2	31487177	3.95e-11	0.744951	2.73e-09	0.00204855	0.0293599	0.0907324	0.000836987	0.141955
rs2256266	29740297	rs2256266	logistic	1	2	29740297	2e-32	0.647598	1.94e-21	1.56e-16	2.04e-09	0.0288532	0.00109436	0.011836
rs2256539	30045719	rs2256539	logistic	1	2	30045719	2.47e-45	0.0119867	1.76e-34	2.29e-13	2.47e-10	0.000282576	0.0898705	0.0838476
rs2256543	30045812	rs2256543	logistic	1	2	30045812	5e-10	0.258345	1.89e-07	5.83e-07	0.0260845	0.0389203	0.00983731	0.697393
rs2256583	31366825	rs2256583	logistic	1	2	31366825	0.0138157	0.786925	0.0493032	0.803859	0.219165	0.485481	0.0909678	0.167825
rs2256594	32294850	rs2256594	logistic	1	2	32294850	2.83e-20	0.173912	1.39e-15	1.66e-05	6.91e-08	0.787553	0.506216	0.0680559
rs2256902	30048351	rs2256902	logistic	1	2	30048351	2.98e-12	0.590682	4.99e-08	2.29e-05	0.000401489	0.25851	0.499101	0.0501833
rs2256919	30048729	rs2256919	logistic	1	2	30048729	4.92e-46	0.0228109	1.75e-35	2.02e-13	8.5e-11	0.000176696	0.191846	0.0485824
rs2256922	30048793	rs2256922	logistic	1	2	30048793	0.630216	0.01702	0.674768	0.0191009	0.392278	0.712025	0.0386653	0.870186
rs2256974	31663371	rs2256974	logistic	1	2	31663371	2.59e-10	0.937805	2.23e-06	0.000739269	0.405428	0.0743063	1.14e-20	0.3333
rs2257126	33239712	rs2257126	logistic	1	2	33239712	1.15e-06	0.52509	0.00011297	0.053153	0.000608321	0.0397069	0.796486	0.965714
rs2257914	30228542	rs2257914	logistic	1	2	30228542	1.2e-19	0.713249	7.42e-12	8.92e-06	9.03e-07	0.0255848	0.000343248	0.983344
rs2259435	31604894	rs2259435	logistic	1	2	31604894	0.0149296	0.34991	0.134197	0.520297	0.0125611	0.0323139	0.0454851	0.211065
rs2259571	31691806	rs2259571	logistic	1	2	31691806	4.22e-11	0.0495106	0.000555615	0.0158043	3.99e-07	0.0116359	0.00554268	0.81134
rs2260000	31701455	rs2260000	logistic	1	2	31701455	1.26e-11	0.031976	0.000196624	0.0145262	6.01e-07	0.0113794	0.00539017	0.769173
rs2260050	31699907	rs2260050	logistic	1	2	31699907	5.6e-11	0.0464416	0.000509894	0.014286	7.81e-07	0.0108057	0.00725804	0.824895
rs2261033	31711570	rs2261033	logistic	1	2	31711570	1.07e-50	0.21016	4.27e-24	9.16e-18	2.49e-15	1.21e-09	7.55e-10	0.851444
rs2267633	29678820	rs2267633	logistic	1	2	29678820	3.28e-13	0.576166	4.46e-10	5.93e-05	0.000651688	0.0850876	0.385231	0.913474
rs2267635	29700410	rs2267635	logistic	1	2	29700410	3.49e-07	0.669389	6.96e-05	0.00531915	0.013183	0.046334	0.0348318	0.490705
rs2267637	30686314	rs2267637	logistic	1	2	30686314	0.438482	0.981719	0.82146	0.616295	0.551926	0.954612	0.601803	0.428526
rs2267639	30688616	rs2267639	logistic	1	2	30688616	0.0247023	0.430409	0.0788654	0.0871601	0.125937	0.69846	0.170123	0.856253
rs2267640	30688872	rs2267640	logistic	1	2	30688872	0.196358	0.764317	0.588905	0.971204	0.0415472	0.306555	0.825972	0.470681
rs2267644	32300538	rs2267644	logistic	1	2	32300538	0.163319	0.859979	0.163394	0.033913	0.108461	3.18e-05	0.353079	0.582576
rs2267647	33083489	rs2267647	logistic	1	2	33083489	0.252127	0.773629	0.695129	0.0671947	0.0324311	0.00857197	0.479709	0.891429
rs2269423	32253685	rs2269423	logistic	1	2	32253685	3.81e-11	0.0881548	5.93e-07	0.000110393	0.00011155	0.166507	0.712222	0.301797
rs2269424	32240211	rs2269424	logistic	1	2	32240211	2e-131	0.00370042	1.39e-88	1.2e-45	2.86e-47	0.00125351	7.3e-06	0.0176956
rs2269425	32231617	rs2269425	logistic	1	2	32231617	0.578174	0.141633	0.808608	0.68583	0.51896	0.308594	4.14e-07	0.868423
rs2269426	32184477	rs2269426	logistic	1	2	32184477	3.05e-16	0.115182	7.71e-08	9.18e-08	5.74e-05	0.00192299	0.012318	0.0948957
rs2269475	31691910	rs2269475	logistic	1	2	31691910	3.98e-18	0.202926	1.91e-11	1.17e-10	0.00341783	0.000176095	1.11e-05	0.0614497
rs2269702	30783114	rs2269702	logistic	1	2	30783114	0.104851	0.786251	0.630731	0.853786	0.0015978	0.221602	0.501361	0.985164
rs2269703	30766364	rs2269703	logistic	1	2	30766364	0.865713	0.914327	0.950478	0.143231	0.154773	0.190279	0.187814	0.682982
rs2269705	30764826	rs2269705	logistic	1	2	30764826	0.235497	0.14935	0.652467	0.3314	0.234689	0.978431	0.452232	0.708327
rs2269706	30760851	rs2269706	logistic	1	2	30760851	0.237889	0.760989	0.617958	0.0491408	0.392362	0.730986	0.427215	0.163044
rs2269709	30648869	rs2269709	logistic	1	2	30648869	0.361412	0.207039	0.933037	0.68446	0.373216	0.459196	0.0429538	0.0393107
rs2269710	30647931	rs2269710	logistic	1	2	30647931	0.656267	0.234672	0.59385	0.805879	0.525642	0.525394	0.0214115	0.0301367
rs2269713	31249106	rs2269713	logistic	1	2	31249106	0.0503734	0.0489078	0.233621	0.0186713	0.394405	0.112183	0.764892	0.278736
rs2270172	30700393	rs2270172	logistic	1	2	30700393	0.308479	0.573252	0.837617	0.871588	0.0221401	0.462019	0.636719	0.280364
rs2270190	31188565	rs2270190	logistic	1	2	31188565	0.000138476	0.99463	0.000692339	0.450864	0.00507881	0.41946	0.0935589	0.12864
rs2272592	31806331	rs2272592	logistic	1	2	31806331	1.59e-34	0.0852959	9.94e-17	1.3e-10	1.26e-11	2.02e-05	0.000625891	0.580437
rs2272593	31709323	rs2272593	logistic	1	2	31709323	2.4e-27	0.0429283	9.46e-14	5.59e-06	3.91e-09	1.28e-06	0.0154778	0.123354
rs2272874	29804224	rs2272874	logistic	1	2	29804224	2.82e-07	0.683472	2.16e-07	0.00239622	0.138154	0.070691	0.616508	0.555411
rs2273017	32445608	rs2273017	logistic	1	2	32445608	2.44e-30	0.0929584	1.85e-18	2.38e-08	1.2e-07	6.91e-06	0.00686933	0.111415
rs2275853	30085047	rs2275853	logistic	1	2	30085047	0.18089	0.749474	0.11455	0.624026	0.924003	0.390007	0.454352	0.713758
rs2280774	32036670	rs2280774	logistic	1	2	32036670	8.41e-47	0.00160031	1.48e-23	9.64e-16	1.29e-15	4.26e-08	0.000850055	0.710849
rs2280800	31754377	rs2280800	logistic	1	2	31754377	5.85e-19	0.384393	1.49e-11	3.52e-11	0.00192945	0.000333769	1.01e-05	0.0741862
rs2280801	31700043	rs2280801	logistic	1	2	31700043	1.88e-11	0.433586	9.4e-08	0.000190805	0.0155785	0.000540464	0.0714355	0.467894
rs2281389	33167774	rs2281389	logistic	1	2	33167774	0.66992	0.0110505	7.01e-06	0.127762	3.5e-09	0.0489374	0.958458	0.539462
rs2281390	33167647	rs2281390	logistic	1	2	33167647	0.566811	0.576018	0.777157	0.0160838	0.60472	5.07e-06	0.753446	0.0619977
rs2284164	30267833	rs2284164	logistic	1	2	30267833	2.49e-06	0.748759	0.00034981	0.000959092	0.256211	0.000113068	0.268075	0.107797
rs2284165	30268034	rs2284165	logistic	1	2	30268034	0.0262021	0.5156	0.212976	0.225321	0.199356	0.37146	0.383677	0.340439
rs2284168	30280212	rs2284168	logistic	1	2	30280212	4.74e-12	0.572667	3.16e-07	0.0169351	8.18e-06	0.668158	0.00232149	0.317192
rs2284169	30280364	rs2284169	logistic	1	2	30280364	1.88e-08	0.726779	4.39e-06	0.000691809	0.0757757	0.000221017	0.241914	0.950334
rs2284178	31540104	rs2284178	logistic	1	2	31540104	0.640032	0.809286	0.326379	0.90476	0.36485	0.00490323	3.23e-13	0.611417
rs2284189	32715374	rs2284189	logistic	1	2	32715374	0.00383737	0.240494	0.479095	0.00556026	0.0803737	0.210271	0.00128162	0.323279
rs2284190	32927495	rs2284190	logistic	1	2	32927495	5.76e-22	0.0364232	1.16e-17	1.33e-06	7.55e-07	0.490445	0.375804	0.0430008
rs2284191	33084632	rs2284191	logistic	1	2	33084632	0.171159	0.0947361	0.00931657	0.786749	0.679744	0.0736142	0.188837	0.560642
rs2285321	30745977	rs2285321	logistic	1	2	30745977	0.120422	0.781822	0.633587	0.862483	0.00230474	0.219787	0.496537	0.956795
rs2285794	30389557	rs2285794	logistic	1	2	30389557	0.664383	0.782869	0.188276	0.317307	0.170257	0.803745	0.648008	0.440261
rs2285795	30228891	rs2285795	logistic	1	2	30228891	7.32e-24	0.60341	7.07e-17	4.61e-14	0.000117171	0.0159281	2.61e-05	0.337032
rs2285799	30365672	rs2285799	logistic	1	2	30365672	0.401273	0.944978	0.412356	0.223741	0.143327	0.882594	0.578359	0.289493
rs2285800	30365476	rs2285800	logistic	1	2	30365476	8.16e-19	0.354499	5.16e-13	1.67e-09	9.88e-05	0.0150911	3.25e-06	0.650511
rs2285801	30317472	rs2285801	logistic	1	2	30317472	7.47e-07	0.650679	0.000273377	0.00090504	0.102935	0.000126173	0.259824	0.264753
rs2285802	30317078	rs2285802	logistic	1	2	30317078	5.79e-07	0.895005	0.000330211	0.00853007	0.14818	4.91e-05	0.0211647	0.314553
rs2285805	30150840	rs2285805	logistic	1	2	30150840	4.84e-05	0.292061	5.12e-06	0.0320248	0.0173785	0.0846509	0.459954	0.201026
rs2286404	30081599	rs2286404	logistic	1	2	30081599	4.86e-07	0.053399	1.24e-05	0.0160655	0.0889402	0.341391	0.881172	0.615863
rs2286405	30081371	rs2286405	logistic	1	2	30081371	4.51e-06	0.453355	4.64e-07	0.0286571	0.0339606	0.614775	0.211759	0.111266
rs2293861	31819103	rs2293861	logistic	1	2	31819103	3.52e-28	0.511574	1.35e-17	2.86e-11	2.55e-09	0.11614	6.23e-06	0.0654923
rs2294472	33207188	rs2294472	logistic	1	2	33207188	2.43e-12	0.263572	2.81e-13	1.09e-06	0.107858	5.14e-06	0.200483	0.444843
rs2294477	33206966	rs2294477	logistic	1	2	33206966	8.22e-10	0.743653	0.00156266	0.00635825	5.84e-08	0.0006324	0.29463	0.661736
rs2294478	33206944	rs2294478	logistic	1	2	33206944	6.96e-08	0.135672	9.06e-16	2.37e-05	0.345151	0.00300316	0.980354	0.857065
rs2294479	33206367	rs2294479	logistic	1	2	33206367	9.71e-17	0.461811	1.68e-08	8.67e-07	4.47e-07	0.00609509	0.758518	0.0580223
rs2294878	32475773	rs2294878	logistic	1	2	32475773	0.000792326	0.00691782	0.135501	0.00287595	0.74286	3.71e-13	6.05e-05	0.89068
rs2294880	32475700	rs2294880	logistic	1	2	32475700	8.44e-66	0.00537158	1.36e-58	6.61e-21	6.48e-30	4.38e-12	0.465757	0.0679161
rs2294881	32475582	rs2294881	logistic	1	2	32475582	2.44e-109	0.636093	1.88e-85	2.68e-45	5.83e-34	0.203291	8.98e-09	0.0366794
rs2294882	32475493	rs2294882	logistic	1	2	32475493	4.27e-109	0.63103	2.67e-85	3.2e-45	7.14e-34	0.205905	9.36e-09	0.0371412
rs2294883	32475429	rs2294883	logistic	1	2	32475429	4.27e-109	0.63103	2.67e-85	3.2e-45	7.14e-34	0.205905	9.36e-09	0.0371412
rs2294884	32475237	rs2294884	logistic	1	2	32475237	7.42e-118	0.82653	1.07e-90	1.41e-48	1.75e-37	0.158127	2.87e-09	0.0214596
rs2295663	31777274	rs2295663	logistic	1	2	31777274	2.38e-11	0.420175	8.78e-08	0.000226864	0.0169353	0.000597972	0.0752183	0.453642
rs2295665	31740665	rs2295665	logistic	1	2	31740665	7.36e-19	0.328196	1.49e-11	3.52e-11	0.00192945	0.000333769	1.01e-05	0.0741862
rs2299851	31826581	rs2299851	logistic	1	2	31826581	1.21e-30	0.183183	3.29e-20	2.42e-12	3.7e-09	0.0542615	3.02e-10	0.00300363
rs2301225	33143838	rs2301225	logistic	1	2	33143838	0.556036	0.792778	0.851269	0.298898	0.972679	9.87e-05	0.206259	0.156827
rs2301226	33142574	rs2301226	logistic	1	2	33142574	5.98e-56	0.869353	6.39e-49	7.8e-28	1.51e-14	0.00934909	0.928893	0.0696406
rs2301271	32833171	rs2301271	logistic	1	2	32833171	3.58e-34	0.914822	1.51e-19	1.07e-10	1.51e-16	0.147831	0.00249227	0.00810616
rs2301751	30147463	rs2301751	logistic	1	2	30147463	0.0216168	0.941575	0.0190017	0.419225	0.526503	0.246864	0.332372	0.377002
rs2301753	30147219	rs2301753	logistic	1	2	30147219	3.3e-06	0.459053	5.39e-07	0.0278435	0.0243231	0.619943	0.210494	0.110682
rs2302347	30695592	rs2302347	logistic	1	2	30695592	0.223263	0.76653	0.604809	0.942205	0.052392	0.316908	0.820009	0.475221
rs23544	33011615	rs23544	logistic	1	2	33011615	1.01e-27	0.0609832	9.19e-16	4.98e-10	9.22e-10	0.221474	0.00671013	0.00221471
rs2394159	29810658	rs2394159	logistic	1	2	29810658	3.34e-23	0.57395	3.87e-16	8.09e-14	1.74e-05	0.0389656	0.00693079	0.354087
rs2394160	29811241	rs2394160	logistic	1	2	29811241	1.07e-19	0.683949	3.28e-13	3.27e-12	8.4e-05	0.027918	0.015737	0.515312
rs2394164	29829376	rs2394164	logistic	1	2	29829376	8.57e-23	0.72216	2.01e-13	1.76e-12	4.08e-06	0.0146043	0.000902896	0.00766262
rs2394173	29881137	rs2394173	logistic	1	2	29881137	3.61e-57	0.926342	4.68e-41	3.46e-23	1.11e-12	3.29e-05	1.55e-05	0.0109868
rs2394177	29895348	rs2394177	logistic	1	2	29895348	0.0355441	0.330601	0.0656211	0.262407	0.0172915	0.0915752	0.879604	0.0532953
rs2394180	29913178	rs2394180	logistic	1	2	29913178	0.339074	0.38114	0.111343	0.700979	0.194278	0.0523971	0.658012	0.0155878
rs2394186	29924400	rs2394186	logistic	1	2	29924400	0.00688924	0.882424	0.042278	0.025745	0.0244318	0.694028	0.628818	0.322131
rs2394250	30051635	rs2394250	logistic	1	2	30051635	1.89e-32	0.707508	4.71e-26	2.69e-13	2.58e-06	0.00267568	2.38e-05	0.0211002
rs2394251	30051667	rs2394251	logistic	1	2	30051667	1.26e-21	0.0257122	7.18e-16	5.72e-08	9.11e-05	0.00373529	0.854867	0.66074
rs2394255	30057800	rs2394255	logistic	1	2	30057800	2.35e-10	0.0248807	5.12e-10	6.67e-08	0.0686567	0.272038	0.0256344	0.220832
rs2394392	30758297	rs2394392	logistic	1	2	30758297	0.0532166	0.997874	0.0346401	0.63818	0.0824173	0.173022	0.295706	0.775693
rs2394401	30832409	rs2394401	logistic	1	2	30832409	0.697328	0.917793	0.736827	0.473729	0.229332	0.0200642	0.58689	0.585076
rs2394403	30875848	rs2394403	logistic	1	2	30875848	0.243822	0.403831	0.476334	0.315934	0.387989	0.154523	0.478634	0.503692
rs2394412	30890214	rs2394412	logistic	1	2	30890214	1.47e-08	0.18299	7.87e-08	0.00210179	0.000132979	0.654793	0.708592	0.459876
rs2394413	30890282	rs2394413	logistic	1	2	30890282	1.47e-08	0.18299	7.87e-08	0.00210179	0.000132979	0.654793	0.708592	0.459876
rs2394414	30890302	rs2394414	logistic	1	2	30890302	4.01e-17	0.470218	9.31e-14	0.000784505	7.12e-09	0.0090449	0.472675	0.731109
rs2394423	31140021	rs2394423	logistic	1	2	31140021	8.3e-26	0.648855	7.8e-22	1.72e-13	0.00118182	0.0219563	2.3e-08	0.576288
rs2394427	31127541	rs2394427	logistic	1	2	31127541	2.27e-31	0.948597	6.38e-24	3.46e-12	6.02e-07	0.156425	4.86e-15	0.573121
rs2394450	30925480	rs2394450	logistic	1	2	30925480	1.97e-05	0.645026	0.00463829	0.230406	0.0834059	0.00479443	0.0214315	0.130695
rs2394734	30154225	rs2394734	logistic	1	2	30154225	1.4e-06	0.170846	3.15e-05	0.000349185	0.00377957	0.809101	0.550683	0.13152
rs2394737	30250978	rs2394737	logistic	1	2	30250978	6.04e-06	0.800826	0.000634473	0.0011233	0.306726	0.000206359	0.290874	0.116438
rs2394778	30318980	rs2394778	logistic	1	2	30318980	3.65e-07	0.806587	0.0003859	0.00494085	0.159565	3.28e-05	0.0206868	0.340498
rs2394818	30458691	rs2394818	logistic	1	2	30458691	0.565053	0.200112	0.225113	0.812019	0.341722	0.00136464	0.141527	0.635519
rs2394819	30458810	rs2394819	logistic	1	2	30458810	0.546986	0.198973	0.227263	0.857662	0.339554	0.00133668	0.142131	0.63424
rs2394820	30458934	rs2394820	logistic	1	2	30458934	0.546994	0.198975	0.22726	0.857658	0.339557	0.00133669	0.14213	0.634242
rs2394882	31240628	rs2394882	logistic	1	2	31240628	0.0079138	0.558781	2.82e-06	0.215826	0.823962	0.186988	0.571596	0.678354
rs2394894	31314899	rs2394894	logistic	1	2	31314899	3.04e-07	0.0503006	5.91e-11	3.3e-05	0.573393	0.869256	7.51e-06	0.0518306
rs2394895	31314958	rs2394895	logistic	1	2	31314958	2.95e-07	0.0505767	5.79e-11	3.28e-05	0.570725	0.870765	7.49e-06	0.0519943
rs2394946	31329132	rs2394946	logistic	1	2	31329132	1.23e-05	0.0369316	0.00667959	0.0341465	0.178808	0.831455	2.79e-07	0.0732591
rs2394950	31338680	rs2394950	logistic	1	2	31338680	0.000187749	0.43702	0.0098052	0.0472182	0.00972265	0.05329	0.328107	0.50839
rs2394963	31359441	rs2394963	logistic	1	2	31359441	0.977778	0.0266417	0.0590201	0.296702	0.521367	0.229678	0.000165963	0.474018
rs2394966	31371890	rs2394966	logistic	1	2	31371890	4.05e-11	0.832866	4.95e-09	0.0153405	0.00435264	0.000658466	0.00115904	0.0408961
rs2394967	31377108	rs2394967	logistic	1	2	31377108	1.23e-27	0.0759419	8.17e-11	0.000839256	9.74e-07	0.650698	6.94e-75	0.109065
rs2394985	31431535	rs2394985	logistic	1	2	31431535	0.230165	0.193181	0.799473	0.880359	0.238933	0.00910765	0.215394	0.633492
rs2395004	31520492	rs2395004	logistic	1	2	31520492	9.2e-08	0.735033	4.55e-08	0.0949177	0.00417936	0.00597535	7.65e-10	0.608166
rs2395029	31539759	rs2395029	logistic	1	2	31539759	1.86e-12	0.401885	5.51e-09	2.26e-05	0.000762481	0.00125185	0.19908	0.0438982
rs2395043	31569945	rs2395043	logistic	1	2	31569945	0.00117204	0.0259915	0.626746	0.530482	0.150051	0.0217085	2.77e-05	0.469827
rs2395110	32323854	rs2395110	logistic	1	2	32323854	0.00958464	0.226303	0.654848	0.737436	0.3656	4.96e-05	0.000725827	0.554285
rs2395141	32390046	rs2395141	logistic	1	2	32390046	3.83e-32	0.0782273	4.85e-22	2.11e-07	2.03e-08	0.000152657	0.0236255	0.0640846
rs2395148	32429532	rs2395148	logistic	1	2	32429532	4.03e-138	0.071593	1.11e-122	3.69e-69	3.75e-46	0.0384736	0.000122586	0.00466986
rs2395149	32433540	rs2395149	logistic	1	2	32433540	0.124672	0.185169	0.713177	0.0252247	0.630673	0.556511	0.00703279	0.371089
rs2395150	32434023	rs2395150	logistic	1	2	32434023	0.897395	0.254799	0.107667	0.0936798	0.779674	0.000529238	0.167531	0.677907
rs2395153	32453573	rs2395153	logistic	1	2	32453573	2.1e-32	0.00105508	1.5e-36	4.87e-11	1.26e-15	1e-12	0.0232793	0.206506
rs2395158	32482573	rs2395158	logistic	1	2	32482573	0.583596	0.147135	0.198962	0.0863375	0.874693	0.0134709	0.0170637	0.886242
rs2395161	32495730	rs2395161	logistic	1	2	32495730	0.000416402	0.16481	3.27e-06	0.130578	0.0241435	0.00399295	0.0285367	0.573592
rs2395162	32495758	rs2395162	logistic	1	2	32495758	0.000496722	0.162831	3.77e-06	0.147905	0.0263193	0.00403856	0.0287074	0.571673
rs2395163	32495787	rs2395163	logistic	1	2	32495787	4.15e-51	0.0723466	3.04e-50	2.05e-22	5.7e-23	6.09e-21	0.123468	0.200521
rs2395164	32495838	rs2395164	logistic	1	2	32495838	0.000497061	0.16285	3.77e-06	0.147927	0.026327	0.00403815	0.0287057	0.571695
rs2395165	32496122	rs2395165	logistic	1	2	32496122	1.33e-79	0.00817264	3.78e-44	4.06e-17	5.85e-27	3.87e-08	0.0125841	0.00200843
rs2395166	32496253	rs2395166	logistic	1	2	32496253	6.83e-59	6.46e-05	1.25e-36	5.75e-13	7.52e-19	5.44e-08	0.925752	0.0466313
rs2395171	32502515	rs2395171	logistic	1	2	32502515	0.000733778	0.100619	4.51e-06	0.0930511	0.0500344	0.00481119	0.0125157	0.85618
rs2395172	32507820	rs2395172	logistic	1	2	32507820	9.91e-07	0.8092	7.47e-07	0.00386219	0.0075811	0.119191	0.267187	0.691515
rs2395173	32512837	rs2395173	logistic	1	2	32512837	3.33e-09	0.0134314	0.0260472	0.476192	0.000126297	7.62e-11	0.363133	0.318297
rs2395177	32513054	rs2395177	logistic	1	2	32513054	1.07e-06	0.806969	7.88e-07	0.00391366	0.00783213	0.118581	0.268374	0.693267
rs2395178	32513340	rs2395178	logistic	1	2	32513340	3.27e-09	0.0136004	0.0266961	0.480013	0.000112627	7.83e-11	0.364926	0.319764
rs2395180	32515288	rs2395180	logistic	1	2	32515288	2.61e-07	0.816395	3.24e-07	0.00278805	0.00592471	0.124601	0.272354	0.759764
rs2395181	32515382	rs2395181	logistic	1	2	32515382	3.01e-07	0.899414	3.33e-07	0.00246725	0.0069491	0.134786	0.253941	0.740749
rs2395182	32521295	rs2395182	logistic	1	2	32521295	6.86e-10	0.824195	1.59e-16	2.61e-07	0.0398827	0.000624699	0.872106	0.555217
rs2395185	32541145	rs2395185	logistic	1	2	32541145	7.25e-141	6.48e-05	5.17e-119	2.34e-44	8.24e-46	2.46e-06	0.0184891	0.100361
rs2395246	32799753	rs2395246	logistic	1	2	32799753	4.08e-15	0.00145098	1.46e-10	0.00293427	5.95e-06	0.0229632	0.00855787	0.281851
rs2395252	32819300	rs2395252	logistic	1	2	32819300	1.03e-34	0.913473	5.07e-20	1.35e-10	1.93e-16	0.102451	0.00170387	0.00788675
rs2395253	32823138	rs2395253	logistic	1	2	32823138	0.161417	0.00275629	0.706354	0.0640351	0.10324	0.318769	0.000430807	0.653561
rs2395256	32836566	rs2395256	logistic	1	2	32836566	4.19e-37	0.918413	6.25e-21	2.21e-11	6.1e-18	0.141182	0.00141654	0.00563159
rs2395258	32836620	rs2395258	logistic	1	2	32836620	3.83e-37	0.916799	5.98e-21	2.17e-11	5.87e-18	0.140679	0.00140991	0.00561289
rs2395269	32925752	rs2395269	logistic	1	2	32925752	1.65e-30	0.0691637	2.72e-31	3.14e-09	2.05e-06	0.590547	0.224318	0.113192
rs2395296	33019792	rs2395296	logistic	1	2	33019792	0.00106755	0.0308779	0.000355453	0.198881	0.494075	0.874033	0.885265	0.0924165
rs2395300	33076254	rs2395300	logistic	1	2	33076254	0.236985	0.324011	0.417958	0.128618	0.439332	0.381244	0.168815	0.558624
[truncated: 5,428 more rows]
